# Supplementary material for: An improved organ explant culture method reveals stem cell lineage dynamics in the adult Drosophila intestine
Source: eLife. 2022 Aug 25;11:e76010. doi: 10.7554/eLife.76010 (PMC9578704; doi:10.7554/eLife.76010)
Supplement: Figure 2—source data 1. [file elife-76010-fig2-data1.xlsx]

## Sheet: Fig. 2A
		Raw NucGreen intensity				NucGreen intensity normalized to Day 0
	Sample	0 Days	1 Day	2 Days	3 Days	1 Day	2 Days	3 Days
	Schneider's Medium - Rep 1	2.8529e+06	4.52061e+06	9.88598e+06	1.33076e+07	1.58457	3.46524	4.6646
	Schneider's Medium - Rep 2	2.09194e+06	5.94142e+06	8.79249e+06	9.23921e+06	2.84015	4.20303	4.41657
	Schneider's Medium - Rep 3	3.20517e+06	4.87399e+06	8.78537e+06	1.24685e+07	1.52066	2.741	3.89013
	Schneider's Medium - Rep 4	3.04733e+06	7.39259e+06	1.01063e+07	1.1859e+07	2.42593	3.31646	3.89161
	Schneider's Medium - Rep 5	4.0922e+06	9.46023e+06	1.34142e+07	1.71302e+07	2.31177	3.278	4.18607
	Schneider's Medium - Rep 6	1.78345e+06	6.58464e+06	7.03555e+06	6.03437e+06	3.69209	3.94492	3.38355
	Schneider's Medium - Rep 7	1.81778e+06	3.17004e+06	4.92443e+06	6.82392e+06	1.74391	2.70903	3.75398
	Schneider's Medium - Rep 8	2.62415e+06	6.27018e+06	7.52637e+06	8.30524e+06	2.38942	2.86812	3.16493
	Schneider's Medium - Rep 9	1.64595e+06	3.844e+06	5.73574e+06	6.08291e+06	2.33543	3.48475	3.69568
	Schneider's Medium - Rep 10	2.88047e+06	5.19481e+06	7.09561e+06	8.09287e+06	1.80346	2.46335	2.80957
	Modified Schneider's Medium (MSM) - Rep 1	3.16088e+06	3.87265e+06	9.51493e+06	1.16613e+07	1.22518	3.01022	3.68926
	Modified Schneider's Medium (MSM) - Rep 2	2.61884e+06	3.81013e+06	8.93247e+06	1.14009e+07	1.45489	3.41084	4.35341
	Modified Schneider's Medium (MSM) - Rep 3	3.47158e+06	6.09766e+06	1.11987e+07	1.4448e+07	1.75645	3.22582	4.16179
	Modified Schneider's Medium (MSM) - Rep 4	3.3797e+06	3.5219e+06	9.02476e+06	1.18164e+07	1.04208	2.67028	3.49628
	Modified Schneider's Medium (MSM) - Rep 5	2.49263e+06	4.04901e+06	7.65849e+06	1.00735e+07	1.62439	3.07246	4.04131
	Modified Schneider's Medium (MSM) - Rep 6	3.17377e+06	3.60193e+06	7.30654e+06	8.72394e+06	1.13491	2.30216	2.74876
	Modified Schneider's Medium (MSM) - Rep 7	3.15773e+06	3.31927e+06	4.04227e+06	7.2351e+06	1.05116	1.28012	2.29123
	Modified Schneider's Medium (MSM) - Rep 8	2.53509e+06	2.72851e+06	4.0485e+06	5.82041e+06	1.0763	1.59698	2.29594
	Modified Schneider's Medium (MSM) - Rep 9	1.99932e+06	1.99506e+06	2.1554e+06	4.81991e+06	0.997865	1.07806	2.41077
	Modified Schneider's Medium (MSM) - Rep 10	1.63247e+06	2.60769e+06	3.6181e+06	4.7604e+06	1.59739	2.21633	2.91606
	Modified Schneider's Medium (MSM) - Rep 11	2.14764e+06	2.45575e+06	2.88545e+06	3.63482e+06	1.14346	1.34354	1.69247
	Modified Schneider's Medium (MSM) - Rep 12	2.89623e+06	2.69629e+06	3.21677e+06	4.32538e+06	0.930965	1.11067	1.49345
	Modified Schneider's Medium (MSM) - Rep 13	2.20033e+06	2.76985e+06	4.0002e+06	4.35219e+06	1.25884	1.818	1.97798
	Modified Schneider's Medium (MSM) - Rep 14	1.85521e+06	2.20107e+06	3.21288e+06	3.942e+06	1.18643	1.73181	2.12482
	MSM + FCS - Rep 1	2.61086e+06	2.95446e+06	2.73185e+06	1.94051e+06	1.1316	1.04634	0.743246
	MSM + FCS - Rep 2	1.51478e+06	2.29998e+06	5.33541e+06	8.02941e+06	1.51836	3.52224	5.30073
	MSM + FCS - Rep 3	2.07326e+06	4.10715e+06	8.1004e+06	9.92062e+06	1.98101	3.90708	4.78503
	MSM + FCS - Rep 4	1.69597e+06	3.08149e+06	4.68989e+06	9.34149e+06	1.81695	2.76531	5.50805
	MSM + FCS - Rep 5	2.04044e+06	2.61704e+06	4.42158e+06	9.37154e+06	1.28259	2.16698	4.59291
	MSM + FCS - Rep 6	2.50293e+06	2.81787e+06	4.68275e+06	7.8873e+06	1.12583	1.87091	3.15123
	MSM + FCS - Rep 7	4.80999e+06	1.37369e+07	1.31046e+07	1.4169e+07	2.8559	2.72445	2.94574
	MSM + FCS - Rep 8	2.39952e+06	2.57147e+06	2.81161e+06	5.72244e+06	1.07166	1.17174	2.38483
	MSM + FCS - Rep 9	2.11247e+06	2.8565e+06	3.93488e+06	6.01113e+06	1.35221	1.86269	2.84554
	MSM + FCS - Rep 10	2.07922e+06	2.64954e+06	7.41776e+06	1.00015e+07	1.27429	3.56756	4.81019
	MSM + Fat bodies and ovaries - Rep 1	1.87741e+06	1.78905e+06	2.04609e+06	4.04645e+06	0.952935	1.08985	2.15534
	MSM + Fat bodies and ovaries - Rep 2	1.52741e+06	2.61737e+06	2.75853e+06	3.54098e+06	1.7136	1.80601	2.31829
	MSM + Fat bodies and ovaries - Rep 3	2.52651e+06	3.02563e+06	2.72031e+06	2.85941e+06	1.19755	1.07671	1.13176
	MSM + Fat bodies and ovaries - Rep 4	2.09219e+06	2.43305e+06	2.88082e+06	3087150	1.16292	1.37694	1.47556
	MSM + Fat bodies and ovaries - Rep 5	1573472	2.07954e+06	2.40356e+06	2.91375e+06	1.32163	1.52755	1.8518
	MSM + Fat bodies and ovaries - Rep 6	2.18162e+06	2.23596e+06	2.3218e+06	3.34441e+06	1.02491	1.06425	1.53299
	MSM + Fat bodies and ovaries - Rep 7	1.08695e+06	1.38609e+06	1.63751e+06	1.62355e+06	1.27521	1.50652	1.49368
	MSM + Fat bodies and ovaries - Rep 8	2.12581e+06	2.35787e+06	2.35047e+06	1.90315e+06	1.10916	1.10568	0.895258
	MSM Fly extract - Rep 1	2.12377e+06	2.63039e+06	2.90754e+06	2.61968e+06	1.23855	1.36905	1.23351
	MSM Fly extract - Rep 2	1.72648e+06	2.10865e+06	2.19404e+06	2.20761e+06	1.22136	1.27082	1.27868
	MSM Fly extract - Rep 3	2.72525e+06	3.49886e+06	3.65796e+06	3.38785e+06	1.28387	1.34225	1.24313
	MSM Fly extract - Rep 4	2.01838e+06	2.22597e+06	2.62e+06	2.60266e+06	1.10285	1.29807	1.28948
	MSM Fly extract - Rep 5	2.69652e+06	2.97297e+06	3.33743e+06	3.16585e+06	1.10252	1.23768	1.17405
	Complete Medium - Rep 1	1.88405e+06	1.56764e+06	1.55126e+06	1.77985e+06	0.832059	0.823362	0.944689
	Complete Medium - Rep 2	2.67294e+06	2.53272e+06	2.54952e+06	2.19815e+06	0.947541	0.953828	0.822371
	Complete Medium - Rep 3	3.24422e+06	2.71196e+06	2.70914e+06	2.67654e+06	0.835936	0.835065	0.825017
	Complete Medium - Rep 4	2.93677e+06	2.46484e+06	2.22853e+06	2.19544e+06	0.839302	0.758838	0.747569
	Complete Medium - Rep 5	2.07067e+06	2.1672e+06	2.10569e+06	2.2499e+06	1.04662	1.01691	1.08655

## Sheet: Fig. 2D
	esgTS > GFP intensity
	in vivo	ex vivo
	3648.51	4056.86
	3246.03	3407.45
	3150.58	3519.54
	4567.85	2110.18
	3037.67	3189.15
	2844.82	3473.89
	1269.05
	2377.05
	3830.43

## Sheet: Fig. 2E
	MexTS > GFP intensity
	in vivo	ex vivo
	1799.67	2292.1
	2019.06	2609.61
	2544.74	2978.76
	1450.28	1514.28
	1771.27	1315.08
	1719.96	1871.39
	1698.73	1639.69
	2770.71	1822.65
	1756.83	2232.49
	1595.36
	1802.56
	1926.76
