# Supplementary material for: An improved organ explant culture method reveals stem cell lineage dynamics in the adult Drosophila intestine
Source: eLife. 2022 Aug 25;11:e76010. doi: 10.7554/eLife.76010 (PMC9578704; doi:10.7554/eLife.76010)
Supplement: Figure 3—figure supplement 1—source data 1. [file elife-76010-fig3-figsupp1-data1.xlsx]

## Sheet: Fig. 3 - figure supplement 1B
	Ctrl Diet	SDS 0.2%	+ 24h Recovery	+ 48h Recovery
	0	2	1	4
	6	0	1	5
	1	0	0	2
	0	0	1	8
	0	0	0	23
	0	18	0	0
	0	4	0	33
	1	0	0	4
	1	1	5	3
	0	1	0	4
	0	0	0	6
	0	0	0	61
	0	2	0	15
	0	0	0	4
	0	0	3	38
	0	3	1	3
	0	0	2	6
	2	0		32
	4	0		4
	0	0		31
	0	0		9
		0

## Sheet: Fig. 3 - figure supplement 1C
	Ctrl Diet	SDS 0.2%	+ 24h Recovery	+ 48h Recovery
	15.21	8.8725	11.83	5.915
	20.28	21.5475	6.3375	25.7725
	31.6875	8.45	11.83	42.25
	19.0125	14.365	15.6325	31.265
	11.4075	8.45	33.8	11.4075
	30.42	9.7175	17.3225	15.6325
	11.4075	8.8725	10.5625	21.125
	28.73	17.745	43.94	40.1375
	29.1525	26.6175	25.35	11.4075
	9.295	36.7575	7.1825	17.3225
	9.295	17.3225	10.985	25.7725
	5.915	9.295	23.2375	25.7725
	16.055	8.45	15.6325	9.295
	8.8725	8.0275	17.3225	19.435
	8.8725	21.97	24.505	9.7175
	7.605	13.9425	10.5625	38.025
	9.295	30.42	18.59	32.11
	7.605	5.07	8.8725	10.14
	29.9975	11.4075	8.8725	8.0275
	13.52	8.0275	3.8025	11.83
	7.605	7.1825	5.4925	17.3225
	16.4775	8.0275	19.0125	21.125
	16.9	8.8725	8.8725	10.985
	8.45	32.955	26.195	13.0975
	10.14	18.59	48.5875	5.4925
	4.6475	12.2525	17.3225	25.7725
	30.8425	25.7725	8.45	8.8725
	9.7175	10.14	13.0975	13.0975
	5.07	16.055	39.715	25.7725
	28.3075	10.14	10.5625	10.14
	9.7175	10.14	20.28	19.8575
	7.605	11.4075	8.0275	11.83
	8.8725	8.0275	7.1825	11.4075
	7.605	6.76	29.9975	29.575
	26.195	8.8725	10.985	18.59
	5.915	5.4925	15.21	15.21
	16.055	5.915	34.645	20.28
	7.605	10.5625	8.8725	9.7175
	6.3375	16.9	20.7025	3.8025
	15.6325	9.7175	10.5625	35.9125
	3.8025	13.52	28.73	13.52
	8.0275	33.3775	9.295	12.675
	9.295	10.14	35.49	8.0275
	31.265	6.3375	16.4775	15.6325
	9.7175	16.9	10.985	11.83
	29.1525	9.7175	10.5625	21.5475
	8.8725	8.8725	14.7875	16.4775
	27.4625	13.0975	17.745	21.5475
	8.45	9.295	10.985	17.745
	27.04	11.83	9.7175	11.4075
	7.605	20.7025	33.3775	46.8975
	32.5325	10.5625	15.21	31.6875
	13.52	12.675	21.5475	16.055
	8.0275	20.28	10.5625	16.4775
	9.7175	12.2525	21.5475	9.295
	32.11	17.745	16.9	21.97
	18.59	33.8	38.87	32.11
	13.9425	9.7175	18.1675	8.8725
	21.97	9.295	43.94	18.59
	3.8025	37.18	9.295	32.955
	8.0275	10.5625	17.3225	7.605
	10.5625	32.955	35.0675	47.7425
	7.1825	36.7575	5.4925	8.0275
	19.435	18.1675	8.0275	38.025
	20.28	16.055	11.83	37.18
	19.0125	9.295	3.8025	25.35
	12.2525	10.14	13.9425	13.9425
	8.45	17.745	8.45	45.63
	24.9275	19.0125	31.265	10.985
	16.4775	19.0125	16.9	17.745
	20.28	38.87	21.125	10.985
	20.28	15.21	17.3225	41.8275
	8.8725	17.3225	32.11	6.76
	16.9	32.11	8.0275	3.8025
	8.8725	11.4075	7.1825	23.66
	5.07	32.11	35.49	23.66
	19.8575	4.6475	40.9825	13.0975
	13.9425	21.125	25.35	37.6025
	10.14	10.14	9.295	44.785
	8.0275	9.295	8.0275	11.4075
	14.7875	10.5625	15.6325	13.9425
	32.5325	8.0275	31.265	9.7175
	18.59	8.45	8.0275	46.475
	21.125	10.14	30.8425	41.405
	24.0825	20.7025	27.04	10.14
	31.265	8.8725	9.295	7.1825
	25.35	19.0125	8.45	15.6325
	10.14	13.9425	8.8725	11.83
	20.7025	7.1825	28.3075	22.815
	8.8725	40.9825	17.3225	40.9825
	11.4075	19.435	7.1825	21.125
	18.1675	13.52	17.745	10.14
	11.4075	10.14	10.14	16.4775
	9.295	13.9425	10.14	19.435
	33.3775	16.9	26.195	10.5625
	14.7875	13.9425	49.4325	38.4475
	22.815	40.1375	6.76	10.985
	30.42	19.8575	9.295	38.025
	17.745	9.7175	20.7025	50.7
	8.45	19.0125	10.5625	24.0825
	32.11	8.8725	46.8975	9.7175
	27.4625	27.885	54.5025	5.4925
	13.52	7.1825	40.1375	27.04
	12.675	14.365	9.7175	43.5175
	9.7175	19.8575	33.3775	23.2375
	10.985	9.7175	7.605	11.83
	33.3775	8.8725	29.1525	27.04
	23.66	34.2225	30.8425	9.7175
	9.7175	8.8725	9.7175	11.4075
	10.5625	33.3775	16.055	27.4625
	7.1825	24.505	16.055	21.5475
	14.365	10.14	9.295	34.645
	30.8425	27.885	24.505	35.0675
	9.295	14.7875	23.66	18.59
	9.295	18.1675	31.265	14.7875
	8.8725	10.14	8.45	10.14
	17.745	9.7175	8.0275	12.675
	5.915	6.3375	19.0125	27.4625
	10.5625	16.4775	13.9425	11.4075
	11.4075	6.76	7.605	9.7175
	9.295	8.0275	29.9975	10.14
	16.9	14.365	8.45	18.1675
	13.52	8.45	8.8725	47.32
	8.0275	5.07	7.1825	10.985
	11.4075	17.745	6.76	12.675
	18.59	30.8425	8.8725	19.435
	29.1525	20.28	15.6325	19.0125
	9.295	16.055	31.265	46.475
	9.7175	21.125	9.7175	18.1675
	8.45	31.265	18.1675	12.2525
	10.985	54.925	14.7875	14.365
	16.9	7.1825	33.8	13.52
	16.9	9.7175	19.8575	36.335
	9.7175	5.4925	31.6875	11.83
	12.675	42.6725	16.9	16.055
	27.885	20.28	8.8725	11.4075
	10.14	22.3925	46.8975	46.475
	27.04	9.295	32.5325	9.7175
	17.745	38.025	19.8575	12.2525
	8.0275	25.7725	18.1675	10.5625
	8.8725	6.76	16.4775	47.7425
	4.6475	10.14	10.985	24.9275
	10.5625	23.2375	22.815	12.675
	10.14	11.4075	15.21	13.9425
	16.9	23.2375	21.97	20.28
	16.055	13.9425	31.265	20.7025
	5.07	9.7175	6.76	19.8575
	29.1525	23.2375	9.295	26.195
	31.265	13.52	7.605	15.6325
	8.0275	28.3075	48.5875	13.0975
	10.5625	13.9425	7.605	13.9425
	9.7175	30.42	24.505	8.8725
	16.055	20.7025	13.0975	29.9975
	15.21	51.1225	27.885	22.815
	8.8725	33.3775	13.0975	18.1675
	11.83	45.63	18.59	23.66
	10.5625	28.3075	11.4075	13.9425
	9.295	12.675	8.45	10.5625
	26.6175	34.645	27.885	39.2925
	12.2525	10.5625	7.605	10.14
	10.14	10.5625	9.7175	32.11
	28.73	12.2525	8.45	20.7025
	10.14	19.8575	11.4075	47.7425
	28.3075	22.815	7.605	7.605
	9.7175	8.45	18.1675	21.5475
	21.5475	35.9125	18.1675	19.0125
	22.815	31.265	9.295	9.7175
	8.45	6.76	38.025	21.125
	13.9425	12.675	24.9275	6.3375
	8.8725	12.2525	7.1825	9.7175
	18.1675	38.87	52.8125	18.1675
	25.7725	30.8425	9.295	19.0125
	9.295	35.49	16.9	25.35
	10.14	22.3925	40.56	13.9425
	8.8725	10.5625	25.35	27.885
	25.7725	10.5625	10.14	13.52
	10.5625	5.915	37.18	14.365
	10.5625	18.1675	11.4075	46.0525
	11.83	13.0975	8.8725	11.83
	9.7175	14.365	13.0975	12.2525
	8.8725	19.0125	10.5625	12.675
	8.45	47.7425	15.6325	39.2925
	20.28	10.5625	13.0975	18.59
	8.8725	16.4775	33.3775	24.505
	18.59	16.4775	40.1375	23.66
	9.295	8.8725	22.3925	10.14
	20.28	50.7	30.8425	21.5475
	8.8725	12.2525	16.4775	8.8725
	9.7175	27.885	25.35	33.3775
	9.295	16.9	32.955	7.605
	26.195	43.5175	27.04	44.785
	21.5475	9.295	10.14	16.9
	29.575	32.955	17.3225	12.2525
	6.76	38.87	13.9425	19.0125
	13.9425	10.985	7.605	13.52
	10.14	9.7175	8.8725	12.2525
	9.7175	17.745	32.11	14.7875
	10.14	10.985	4.6475	11.83
	7.1825	11.4075	16.4775	14.7875
	9.295	36.335	9.295	24.9275
	10.14	24.0825	8.8725	24.0825
	8.8725	48.5875	9.295	19.435
	9.295	15.6325	8.0275	21.97
	18.1675	26.6175	9.295	32.11
	7.605	9.7175	26.195	38.4475
	17.3225	28.3075	11.83	18.59
	10.5625	23.2375	7.1825	19.435
	10.14	48.165	18.1675	10.14
	22.815	18.59	6.76	20.7025
	9.7175	26.195	9.7175	12.2525
	9.295	19.8575	31.265	33.8
	8.45	38.025	8.45	11.83
	9.295	10.14	7.605	11.83
	9.295	25.7725	7.605	39.2925
	16.4775	6.3375	37.18	22.815
	9.295	21.5475	28.3075	16.4775
	10.5625	13.9425	21.125	15.21
	9.295	37.18	20.7025	8.8725
	10.14	11.83	17.3225	40.1375
	8.0275	10.985	8.0275	31.265
	3.8025	19.0125	25.7725	19.8575
	7.605	29.575	16.055	8.45
	11.4075	38.025	30.42	22.815
	8.45	11.83	29.1525	6.76
	9.295	18.59	53.6575	38.025
	16.4775	5.07	35.0675	20.28
	6.76	9.295	8.0275	12.675
	8.0275	12.675	8.45	13.0975
	11.83	10.5625	5.915	8.8725
	6.3375	10.5625	7.605	16.9
	17.745	19.435	31.6875	13.52
	10.985	10.985	17.745	14.7875
	8.0275	18.59	56.615	15.6325
	10.985	6.76	17.745	18.1675
	12.675	10.985	14.365	20.7025
	8.0275	6.3375	16.9	45.2075
	6.76	9.7175	12.2525	10.5625
	15.21	20.28	5.915	33.3775
	9.7175	52.39	15.6325	50.2775
	17.745	13.52	33.3775	21.97
	9.295	10.985	15.21	38.4475
	12.675	12.2525	28.3075	20.7025
	24.0825	8.0275	24.505	40.1375
	6.3375	14.365	11.4075	11.83
	21.97	15.21	18.1675	20.7025
	12.2525	17.3225	17.745	9.7175
	16.4775	21.97	9.295	14.7875
	8.8725	14.365	8.45	16.4775
	9.7175	18.1675	32.955	16.9
	16.9	51.545	13.52	17.3225
	18.1675	42.6725	21.125	6.76
	11.4075	8.8725	16.4775	30.42
	8.45	23.2375	15.6325	21.125
	21.125	7.1825	7.605	6.76
	12.2525	10.985	9.295	6.3375
	6.76	21.97	13.9425	7.1825
	16.055	27.04	49.4325	28.73
	12.2525	19.435	16.4775	7.1825
	5.4925	11.83	28.3075	23.2375
	13.52	13.9425	28.73	7.1825
	30.42	10.985	16.055	5.915
	29.9975	23.2375	10.985	21.97
	5.4925	19.0125	13.52	8.8725
	13.52	10.5625	19.435	17.745
	12.2525	5.915	11.83	17.3225
	7.1825	45.63	30.42	37.18
	10.985	16.055	16.055	17.745
	13.9425	44.3625	17.745	42.6725
	24.9275	17.3225	19.0125	17.3225
	13.52	37.18	18.1675	14.365
	13.9425	9.295	11.4075	38.025
	7.605	18.59	16.4775	10.5625
	11.83	14.7875	15.21	19.435
	6.76	41.405	28.3075	8.0275
	13.52	17.3225	16.4775	7.605
	13.0975	15.21	11.4075	46.475
	12.675	9.295	7.1825	8.0275
	12.675	21.97	13.0975	15.6325
	24.0825	19.0125	33.3775	19.8575
	6.3375	13.52	10.5625	24.9275
	24.9275	11.83	17.3225	19.435
	9.295	30.42	17.3225	16.9
	5.4925	7.1825	12.675	22.815
	3.8025	10.985	29.9975	15.6325
	22.3925	24.505	15.6325	8.45
	23.2375	12.675	53.235	19.435
	8.0275	30.8425	22.815	6.76
	11.4075	8.8725	7.605	10.5625
	9.295	13.0975	31.265	29.9975
	13.9425	17.3225	6.3375	33.8
	5.07	16.9	34.645	20.28
	8.8725	11.4075	17.745	6.3375
	5.4925	24.505	18.1675	15.6325
	5.915	32.11	17.745	7.605
	6.76	10.985	34.2225	15.6325
	25.7725	15.6325	17.745	31.6875
	6.3375	16.4775	31.265	50.2775
	10.5625	10.5625	15.21	15.21
	32.955	28.3075	5.915	30.8425
	7.1825	42.25	15.6325	35.49
	5.4925	5.915	13.52	11.83
	6.76	44.3625	17.3225	8.8725
	13.0975	21.125	35.49	50.2775
	14.365	7.605	16.9	8.45
	18.59	40.9825	19.0125	43.94
	13.9425	11.4075	19.8575	19.0125
	6.3375	17.745	34.2225	6.76
	11.4075	33.8	8.8725	11.4075
	5.915	8.0275	8.0275	12.675
	30.8425	22.815	28.3075	6.3375
	12.2525	4.6475	8.45	7.1825
	17.3225	10.985	14.365	13.52
	14.365	21.125	8.0275	17.3225
	8.45	15.6325	15.6325	31.6875
	6.76	22.815	15.6325	15.6325
	6.76	52.8125	13.9425	36.7575
	33.8	10.5625	9.7175	5.4925
	19.435	21.5475	45.63	11.4075
	12.2525	10.5625	10.5625	18.1675
	13.9425	33.3775	9.295	46.0525
	8.8725	11.4075	13.0975	33.3775
	14.365	27.885	22.815	32.5325
	19.8575	23.2375	42.25	13.0975
	8.0275	13.9425	39.2925	12.2525
	23.66	7.605	29.9975	36.335
	17.3225	45.2075	13.0975	19.8575
	8.45	8.8725	16.9	11.83
	7.1825	21.97	16.4775	6.3375
	10.985	10.985	16.055	50.2775
	10.5625	21.5475	27.4625	15.21
	11.83	8.8725	17.745	50.2775
	7.1825	16.4775	26.6175	12.675
	11.83	17.3225	25.35	21.5475
	16.055	7.1825	25.7725	29.9975
	9.295	14.365	3.8025	12.2525
	16.055	14.365	17.3225	16.4775
	7.1825	9.7175	27.04	14.365
	9.295	6.3375	18.1675	16.4775
	11.4075	10.14	55.3475	24.0825
	14.365	6.3375	31.265	26.6175
	14.7875	13.9425	27.4625	16.055
	14.7875	9.7175	36.7575	17.745
	7.605	10.985	13.52	46.475
	3.8025	10.5625	27.04	29.9975
	11.83	14.7875	35.49	41.8275
	11.83	13.0975	23.2375	9.295
	10.14	7.605	17.745	11.83
	27.885	10.14	13.0975	10.14
	15.21	8.8725	17.3225	8.8725
	16.4775	24.9275	7.605	32.955
	10.5625	26.195	8.8725	18.1675
	19.0125	13.52	22.3925	17.3225
	5.915	11.83	10.985	10.985
	12.675	14.7875	25.7725	10.14
	22.815	8.45	6.3375	15.21
	25.7725	40.56	10.5625	10.985
	9.7175	24.9275	21.125	13.9425
	3.8025	29.1525	29.9975	16.4775
	19.8575	24.505	10.985	7.605
	11.4075	6.76	33.8	10.985
	15.21	18.1675	38.025	31.6875
	17.3225	25.35	13.52	9.7175
	14.7875	12.2525	8.8725	8.8725
	22.815	7.1825	27.4625	7.605
	10.5625	6.76	19.8575	8.8725
	11.4075	10.14	17.745	19.0125
	30.8425	9.7175	21.5475	9.7175
	22.815	8.0275	8.8725	10.5625
	5.915	53.6575	24.9275	10.5625
	19.0125	11.4075	30.42	9.295
	19.435	18.1675	8.45	11.4075
	7.1825	18.59	26.6175	16.9
	13.0975	22.815	10.985	10.14
	15.21	22.815	16.9	11.4075
	11.4075	7.605	26.195	12.675
	30.42	13.52	32.5325	18.59
	27.04	12.675	10.985	11.83
	29.1525	49.4325	9.7175	10.985
	10.14	33.8	16.9	10.14
	11.4075	16.9	8.45	10.985
	16.4775	19.435	32.11	10.14
	10.5625	25.7725	18.59	4.6475
	22.3925	46.475	20.7025	10.5625
	8.8725	25.35	31.265	15.21
	18.1675	15.6325	21.5475	9.7175
	14.365	10.5625	23.66	10.14
	9.7175	29.575	8.8725	18.59
	5.915	40.56	19.0125	19.0125
	27.04	15.6325	17.745	9.7175
	17.3225	25.7725	6.76	9.295
	6.76	46.0525	22.3925	7.605
	26.6175	24.0825	30.8425	8.45
	27.4625	9.295	17.745	18.59
	13.52	26.6175	19.435	22.815
	10.5625	7.1825	27.4625	11.4075
	18.59	14.365	18.1675	22.3925
	14.365	44.785	7.1825	16.4775
	13.9425	46.0525	21.97	10.5625
	11.4075	19.0125	31.265	9.7175
	29.1525	6.76	42.6725	19.8575
	16.9	29.9975	10.985	10.5625
	8.0275	5.915	38.025	12.675
	13.9425	25.7725	9.7175	3.8025
	16.055	11.4075	8.8725	39.715
	9.7175	15.6325	6.76	35.9125
	11.4075	35.9125	9.7175	5.07
	9.7175	12.2525	13.9425	19.0125
	9.7175	13.52	14.365	19.0125
	6.3375	8.8725	9.7175	17.3225
	16.055	13.9425	19.8575	8.0275
	26.6175	40.1375	27.04	18.59
	23.66	22.3925	14.7875	10.14
	16.055	18.59	30.42	19.0125
	14.7875	12.675	13.52	20.28
	19.435	12.675	16.4775	18.1675
	13.52	11.83	50.7	7.1825
	8.8725	15.21	8.8725	18.1675
	11.4075	13.9425	28.3075	13.52
	10.985	12.2525	22.815	9.295
	9.7175	12.2525	8.0275	11.4075
	20.28	40.56	16.055	17.3225
	20.28	29.9975	12.675	8.8725
	26.6175	24.9275	13.0975	12.675
	19.0125	6.76	6.3375	9.7175
	19.8575	13.0975	9.7175	19.0125
	22.3925	12.2525	16.4775	46.475
	30.42	11.4075	17.745	27.4625
	27.04	9.295	15.6325	10.14
	11.4075	32.5325	16.055	15.6325
	7.1825	15.21	11.4075	28.73
	15.21	43.94	7.1825	35.49
	19.435	18.59	22.3925	14.7875
	17.745	34.2225	15.6325	6.76
	12.675	50.7	8.8725	15.21
	15.21	16.4775	32.5325	19.8575
	9.295	11.83	11.4075	49.01
	20.28	52.8125	29.9975	10.985
	26.195	10.985	9.7175	15.21
	7.1825	11.4075	38.87	3.8025
	12.2525	40.56	19.0125	21.5475
	15.6325	15.21	30.42	8.0275
	24.9275	25.35	10.14	12.675
	7.1825	30.8425	34.645	20.28
	29.1525	24.9275	14.365	21.5475
	8.0275	29.575	8.45	34.2225
	7.605	7.605	17.745	10.5625
	13.52	19.0125	12.2525	31.265
	7.1825	14.365	10.985	14.365
	28.3075	37.18	18.59	15.6325
	8.45	21.97	10.14	7.605
	8.0275	14.7875	22.3925	20.28
	14.7875	10.14	47.7425	6.3375
	3.8025	36.7575	8.0275	10.14
	28.3075	6.76	9.295	11.4075
	15.21	9.7175	33.8	34.645
	32.5325	7.605	33.3775	26.195
	14.7875	14.365	8.45	35.9125
	12.675	19.8575	11.4075	29.1525
	22.3925	32.955	10.985	36.7575
	25.35	8.45	43.94	19.0125
	13.9425	22.815	6.3375	14.365
	20.28	41.8275	7.1825	7.1825
	8.8725	8.8725	9.7175	33.3775
	11.4075	7.1825	10.5625	9.7175
	29.9975	23.66	19.0125	12.2525
	10.5625	15.21	22.815	14.7875
	13.0975	7.1825	15.21	21.5475
	11.83	27.885	11.83	31.6875
	16.9	29.1525	19.435	36.7575
	24.9275	12.2525	12.2525	36.7575
	23.2375	27.4625	27.4625	11.4075
	24.505	27.4625	8.0275	8.8725
	7.605	13.9425	16.9	8.8725
	7.1825	20.28	14.7875	4.225
	16.9	33.3775	16.9	33.8
	11.83	9.295	28.73	39.2925
	8.0275	17.745	8.45	35.49
	30.8425	10.985	19.435	33.8
	15.6325	8.8725	13.9425	34.645
	28.3075	6.76	10.14	35.49
	15.21	25.7725	10.14	35.49
	23.2375	51.9675	7.605	27.885
	33.8	27.4625	3.8025	19.8575
	14.365	26.6175	33.8	32.11
	25.35	23.2375	13.0975	19.435
	9.295	27.885	17.745	26.6175
	10.985	13.9425	15.6325	28.73
	22.3925	20.28	19.435	26.6175
	14.365	16.055	8.0275	7.605
	16.055	10.14	14.7875	33.3775
	12.2525	16.9	28.73	34.2225
	16.055	4.6475	21.5475	8.8725
	10.5625	15.21	12.675	6.76
	14.365	24.505	6.76	29.9975
	14.365	10.985	10.14	29.575
	13.9425	10.5625	9.7175	18.1675
	14.365	8.0275	11.4075	21.125
	23.2375	14.365	19.0125	11.4075
	19.435	12.675	20.28	23.66
	6.3375	30.8425	24.0825	5.915
	14.7875	12.675	40.9825	16.055
	14.365	20.28	21.5475	14.7875
	19.435	23.2375	13.9425	3.8025
	12.2525	4.225	52.8125	19.0125
	27.4625	8.8725	6.76	41.8275
	25.35	9.295	9.7175	32.5325
	6.76	14.7875	38.87	15.21
	12.2525	48.5875	9.295	29.9975
	18.59	21.125	20.28	15.21
	22.3925	21.5475	16.4775	49.01
	12.2525	32.11	11.4075	25.35
	8.45	11.4075	8.8725	20.28
	18.1675	17.745	14.365	38.4475
	16.4775	6.76	34.2225	21.97
	13.9425	19.0125	16.4775	32.955
	16.055	47.32	17.3225	11.83
	12.2525	24.0825	29.575	24.9275
	8.45	38.87	18.1675	20.7025
	9.295	12.2525	21.125	10.985
	14.7875	10.5625	10.14	10.985
	9.295	32.5325	31.6875	12.675
	7.605	12.675	5.4925	44.3625
	3.8025	27.4625	31.265	31.265
	15.6325	11.4075	10.985	32.955
	16.055	13.52	22.3925	44.3625
	24.505	9.7175	36.7575	9.7175
	11.4075	31.265	18.1675	22.3925
	10.5625	16.4775	16.4775	4.225
	10.5625	45.63	16.4775	50.2775
	12.2525	37.6025	9.295	11.83
	17.745	42.6725	26.195	21.5475
	5.915	11.83	21.97	21.97
	15.21	10.985	16.9	10.985
	13.0975	9.295	19.435	31.6875
	19.435	7.605	17.3225	21.125
	8.8725	6.76	10.14	27.4625
	10.5625	12.675	16.4775	17.3225
	9.7175	29.9975	15.21	5.07
	10.5625	16.9	18.59	10.14
	13.9425	8.45	21.125	22.815
	4.6475	22.815	39.2925	11.4075
	12.2525	6.76	19.435	32.11
	10.985	43.94	7.605	11.4075
	8.0275	19.435	12.2525	46.475
	9.295	15.21	16.055	22.3925
	10.985	38.4475	17.745	30.42
	8.8725	16.055	18.59	12.2525
	16.4775	20.28	13.9425	21.97
	21.125	43.94	17.3225	16.9
	8.45	43.095	28.3075	20.28
	12.675	40.9825	18.1675	20.28
	9.295	12.2525	21.5475	19.8575
	6.76	7.605	35.9125	8.45
	16.4775	24.0825	19.0125	12.675
	11.4075	12.675	12.2525	35.0675
	9.295	17.745	20.28	9.7175
	7.605	9.7175	7.605	24.0825
	8.0275	6.3375	19.435	22.815
	14.365	10.5625	20.28	15.21
	15.6325	15.21	9.295	7.1825
	7.1825	9.295	17.3225	4.6475
	18.59	30.42	8.45	9.295
	10.14	43.94	16.055	8.45
	8.8725	10.14	25.35	38.4475
	14.365	54.5025	21.125	42.6725
	7.1825	10.5625	35.49	38.025
	18.1675	48.165	19.8575	15.21
	10.14	13.9425	29.575	7.605
	15.6325	31.265	17.3225	31.265
	10.14	30.8425	29.1525	9.295
	16.9	19.8575	8.8725	9.295
	7.1825	23.66	31.6875	40.56
	8.45	25.7725	18.59	6.76
	7.605	10.5625	18.59	9.7175
	8.8725	23.66	10.985	21.5475
	8.45	17.3225	8.8725	8.8725
	7.605	33.8	45.63	49.855
	5.07	8.45	16.055	10.5625
	7.605	17.745	23.2375	20.28
	8.45	12.2525	15.21	33.8
	7.605	10.985	19.0125	35.9125
	29.1525	26.6175	19.8575	13.0975
	15.21	13.52	9.7175	29.1525
	33.8	23.66	14.7875	11.83
	8.8725	28.73	23.2375	16.9
	14.7875	10.14	19.0125	14.7875
	19.0125	36.7575	18.1675	41.405
	8.0275	14.7875	7.1825	18.59
	8.0275	8.0275	13.52	9.7175
	20.7025	8.8725	9.295	47.7425
	11.4075	22.3925	19.435	9.7175
	9.7175	6.3375	44.3625	8.45
	19.8575	5.4925	38.025	16.055
	17.3225	13.9425	9.7175	14.365
	14.365	22.3925	38.4475	18.59
	17.745	17.3225	16.9	44.3625
	8.0275	16.055	45.2075	15.6325
	8.0275	22.3925	9.295	16.055
	12.2525	7.605	27.885	49.855
	7.605	3.8025	13.0975	19.0125
	18.1675	11.83	14.7875	39.715
	8.0275	19.8575	46.8975	10.985
	16.9	16.055	6.3375	20.28
	9.7175	22.815	32.5325	28.73
	12.675	17.3225	10.985	11.83
	8.0275	31.6875	9.295	18.1675
	8.45	18.59	12.675	19.8575
	21.5475	8.45	10.5625	16.055
	16.4775	12.675	55.77	29.1525
	9.295	19.8575	30.8425	21.97
	13.0975	11.83	13.0975	10.5625
	8.8725	20.7025	19.0125	41.405
	16.9	38.4475	7.605	16.9
	8.45	9.7175	10.5625	17.745
	7.605	22.815	6.3375	4.6475
	9.295	19.8575	8.8725	15.6325
	24.9275	10.985	23.2375	11.83
	7.1825	21.125	8.8725	13.52
	16.4775	13.9425	18.59	11.83
	24.9275	25.7725	52.8125	11.83
	23.66	27.885	8.8725	32.11
	7.605	39.715	14.7875	45.63
	7.605	22.3925	55.3475	8.45
	7.605	21.125	40.1375	18.1675
	17.3225	20.7025	34.2225	18.59
	11.83	49.855	21.5475	16.055
	6.3375	19.0125	16.4775	8.0275
	7.605	46.475	9.7175	17.3225
	15.6325	12.675	8.8725	21.125
	16.055	10.985	38.87	9.295
	7.605	21.125	37.6025	29.9975
	9.7175	28.73	35.0675	9.7175
	6.76	16.4775	27.4625	8.45
	9.295	9.7175	17.745	14.365
	8.45	4.225	28.3075	10.985
	10.14	12.2525	18.59	16.055
	14.365	7.605	5.07	10.5625
	17.3225	15.21	11.83	14.365
	6.76	8.45	18.1675	10.5625
	10.14	30.8425	32.955	27.04
	8.45	8.45	11.83	7.1825
	8.45	23.2375	14.365	13.0975
	11.4075	6.76	32.5325	26.6175
	8.0275	49.4325	56.1925	15.6325
	14.7875	46.475	8.45	20.7025
	15.21	26.6175	21.97	12.2525
	8.0275	9.295	10.14	24.0825
	15.21	52.8125	35.9125	15.21
	9.7175	9.7175	27.885	24.0825
	13.9425	6.3375	19.8575	21.5475
	18.1675	28.73	9.295	30.42
	18.1675	4.6475	37.6025	14.365
	4.225	10.5625	19.8575	19.435
	10.14	13.52	40.56	40.9825
	13.0975	9.7175	9.295	13.9425
	5.07	19.435	43.095	33.8
	8.8725	3.8025	37.6025	14.365
	7.1825	22.3925	51.545	14.365
	5.07	10.5625	50.7	13.0975
	18.59	18.59	33.8	12.675
	8.45	7.605	5.915	15.21
	8.0275	43.5175	29.1525	13.52
	7.605	27.885	28.73	12.2525
	8.0275	19.8575	31.265	14.365
	13.9425	16.055	10.14	11.83
	12.2525	49.01	43.94	24.9275
	7.605	45.2075	10.985	14.7875
	24.9275	18.1675	39.2925	27.04
	24.505	42.25	13.9425	20.7025
	3.8025	4.6475	28.73	13.52
	24.9275	11.83	16.055	15.6325
	20.28	4.225	7.1825	9.295
	5.915	5.07	35.0675	13.9425
	7.605	47.32	19.8575	10.985
	16.9	16.055	38.87	36.7575
	24.9275	29.1525	17.3225	39.2925
	18.1675	6.76	13.0975	6.3375
	21.125	26.6175	55.3475	13.9425
	11.4075	40.56	51.545	6.76
	21.97	7.605	11.83	6.76
	14.7875	52.8125	13.52	20.7025
	13.9425	22.3925	5.915	23.2375
	12.675	27.4625	39.2925	7.1825
	19.8575	26.195	35.9125	21.5475
	16.055	9.295	16.4775	22.815
	6.76	24.505	37.18	15.6325
	10.14	16.4775	32.5325	17.3225
	9.295	15.21	10.14	37.18
	21.5475	36.7575	49.01	12.2525
	11.83	40.56	49.855	23.66
	11.83	42.6725	9.295	21.5475
	10.14	13.52	15.21	39.715
	14.365	12.2525	21.125	24.9275
	20.28	7.605	9.7175	7.605
	13.0975	23.66	9.295	13.9425
	12.675	13.0975	46.0525	8.8725
	12.2525	54.08	18.59	13.9425
	17.745	27.04	10.5625	36.7575
	8.0275	19.0125	18.59	33.3775
	19.435	11.83	19.0125	27.885
	19.435	27.885	12.675	10.5625
	17.745	45.2075	52.8125	38.4475
	10.5625	8.0275	44.785	11.4075
	16.4775	29.575	35.0675	41.8275
	16.9	19.435	53.235	7.1825
	19.0125	27.04	27.4625	7.1825
	11.83	13.0975	26.6175	5.915
	20.7025	14.7875	18.59	12.2525
	16.055	8.0275	9.7175	27.4625
	14.7875	23.66	24.0825	40.9825
	10.5625	10.5625	45.2075	24.0825
	29.1525	11.83	34.645	31.6875
	8.0275	7.1825	7.1825	13.9425
	11.83	7.605	13.0975	13.9425
	16.055	38.87	19.8575	26.195
	17.3225	15.6325	48.5875	26.195
	13.52	34.2225	30.42	24.0825
	13.52	32.11	11.83	14.7875
	10.5625	19.8575	8.45	15.6325
	8.8725	11.4075	17.3225	26.6175
	8.0275	17.745	12.2525	11.83
	6.76	9.7175	5.4925	12.2525
	22.3925	50.7	34.645	5.07
	11.4075	14.365	19.435	23.66
	11.83	9.7175	25.7725	47.32
	9.295	16.055	19.8575	13.0975
	7.1825	11.83	35.0675	39.715
	24.505	20.28	25.7725	14.365
	12.2525	24.505	8.8725	29.1525
	11.4075	12.2525	15.21	24.0825
	10.14	22.815	11.4075	20.7025
	8.45	10.14	38.4475	9.295
	8.45	9.295	32.5325	46.475
	10.14	23.2375	13.52	47.32
	10.14	9.7175	42.25	39.715
	10.985	4.225	19.0125	8.8725
	11.83	5.07	41.405	5.915
	9.7175	10.14	54.08	11.4075
	11.4075	9.295	54.925	20.28
	11.83	16.055	25.35	11.83
	13.0975	24.9275	7.605	8.45
	7.605	43.94	13.9425	23.2375
	8.0275	18.1675	5.4925	12.2525
	28.3075	13.0975	17.745	24.9275
	5.07	8.0275	7.1825	8.8725
	12.675	13.0975	38.025	13.0975
	32.5325	22.3925	43.94	22.3925
	10.985	10.985	10.5625	9.7175
	9.7175	15.21	34.2225	12.675
	11.4075	47.32	47.7425	12.2525
	8.0275	10.985	45.2075	9.7175
	10.985	19.435	47.7425	13.52
	10.985	42.6725	8.8725	27.04
	7.605	16.9	8.0275	23.2375
	8.0275	10.985	9.7175	17.3225
	20.28	5.07	15.6325	23.2375
	16.055	12.675	50.2775	35.49
	29.1525	5.915	9.7175	7.1825
	11.4075	10.14	14.7875	6.76
	11.4075	8.45	19.435	31.265
	7.605	6.3375	31.265	18.1675
	10.14	12.675	11.4075	12.2525
	10.985	43.94	38.87	38.025
	16.4775	15.21	16.4775	11.83
	8.0275	9.295	9.7175	13.52
	9.7175	4.6475	29.9975	15.21
	17.3225	11.4075	28.73	21.5475
	7.605	8.8725	7.1825	9.295
	7.605	39.2925	19.8575	12.2525
	15.6325	27.885	19.8575	38.87
	5.4925	7.1825	16.055	28.3075
	15.6325	8.0275	55.3475	32.11
	13.9425	8.0275	17.3225	16.4775
	16.055	35.9125	11.4075	35.9125
	28.73	34.645	16.4775	8.0275
	9.7175	8.45	48.5875	12.675
	19.8575	26.195	16.4775	12.675
	33.8	24.0825	18.1675	13.52
	9.7175	5.07	8.0275	6.3375
	14.7875	33.3775	32.11	5.915
	10.14	7.1825	32.955	12.2525
	8.45	6.3375	17.745	32.11
	5.915	14.365	10.985	5.915
	25.35	45.2075	16.9	10.5625
	16.055	13.9425	27.04	11.83
	13.52	9.7175	12.675	33.3775
	10.14	47.7425	15.6325	16.055
	18.1675	15.6325	11.83	12.675
	21.97	14.7875	50.7	23.66
	21.5475	26.195	10.985	24.0825
	6.76	10.985	18.1675	49.4325
	6.3375	27.4625	34.645	9.295
	19.435	12.2525	40.56	7.1825
	9.7175	27.885	51.1225	15.21
	10.985	25.7725	10.14	5.07
	27.04	29.575	10.14	23.2375
	6.76	29.9975	13.9425	7.1825
	9.295	49.01	46.8975	7.1825
	9.7175	25.7725	12.2525	8.0275
	8.0275	50.7	16.9	24.9275
	12.675	31.265	17.745	8.45
	5.915	29.9975	5.4925	50.7
	6.3375	28.73	30.8425	10.14
	3.8025	29.575	5.915	12.2525
	8.45	27.885	5.4925	23.66
	16.055	30.8425	45.2075	16.055
	22.3925	32.11	21.5475	13.52
	14.7875	5.915	13.52	24.9275
	12.675	25.35	7.605	34.645
	7.1825	18.59	50.2775	45.2075
	21.5475	16.4775	24.505	8.8725
	4.6475	20.28	6.76	24.505
	9.295	14.7875	26.195	11.83
	18.1675	8.0275	11.4075	10.5625
	16.4775	7.1825	9.7175	29.9975
	15.21	7.605	5.915	49.4325
	18.1675	7.605	31.6875	44.785
	13.52	9.295	41.8275	8.0275
	18.59	20.28	8.45	13.0975
	11.83	26.195	18.1675	27.04
	23.66	4.225	8.8725	21.97
	10.985	8.45	27.4625	51.1225
	8.0275	8.45	14.365	7.605
	25.7725	5.07	4.6475	46.8975
	5.4925	28.3075	22.815	9.295
	10.985	7.605	7.605	11.83
	10.14	9.295	7.605	27.4625
	19.435	6.3375	25.35	9.295
	16.9	12.675	8.0275	14.7875
	11.83	8.45	14.7875	20.7025
	16.4775	16.9	22.815	37.6025
	23.66	9.7175	5.4925	21.125
	33.3775	9.7175	43.095	3.8025
	6.76	21.97	50.2775	18.1675
	10.5625	16.4775	29.9975	40.9825
	8.8725	21.125	16.055	35.49
	24.505	14.365	12.2525	45.2075
	9.295	10.985	17.3225	5.4925
	19.8575	10.985	33.8	43.94
	17.3225	30.8425	27.04	42.25
	24.0825	19.8575	50.7	42.25
	8.45	7.605	18.1675	15.6325
	8.8725	14.7875	35.9125	20.28
	9.295	17.3225	33.3775	16.9
	19.8575	28.3075	16.055	31.265
	19.8575	6.76	21.97	8.8725
	21.5475	5.915	46.8975	20.28
	8.8725	36.335	13.0975	39.2925
	8.45	18.1675	44.3625	49.4325
	10.985	7.1825	26.6175	21.5475
	20.7025	10.14	5.915	10.14
	16.9	54.5025	21.125	7.1825
	13.52	29.9975	5.4925	13.9425
	10.985	8.0275	29.9975	21.97
	21.5475	9.295	17.745	27.885
	10.985	30.8425	27.885	17.3225
	26.195	17.3225	36.335	8.45
	9.295	43.095	28.3075	8.8725
	17.3225	25.7725	14.7875	29.575
	10.985	19.0125	14.365	14.365
	8.0275	15.21	36.7575	46.0525
	10.5625	8.0275	10.14	17.3225
	10.985	31.265	40.9825	8.45
	7.605	50.7	27.885	15.21
	19.8575	29.1525	7.605	20.28
	22.815	19.8575	36.335	16.9
	15.21	3.8025	52.39	13.9425
	19.435	16.4775	9.295	10.985
	11.4075	30.42	16.055	5.915
	9.295	11.83	40.56	8.45
	21.125	8.0275	31.6875	5.915
	9.7175	21.125	51.545	27.04
	15.6325	7.1825	26.195	39.715
	8.8725	6.3375	22.815	9.295
	11.83	39.715	44.785	14.365
	17.745	19.8575	47.7425	13.9425
	9.295	31.265	45.2075	26.195
	18.1675	32.11	51.9675	8.45
	16.9	24.9275	27.4625	11.4075
	10.5625	13.0975	23.66	8.45
	8.8725	31.6875	48.165	40.56
	10.5625	36.335	25.35	21.125
	16.4775	6.3375	11.83	9.295
	15.6325	10.5625	28.3075	42.6725
	22.3925	9.7175	15.6325	22.3925
	16.4775	22.815	15.6325	6.76
	5.4925	16.4775	9.295	19.8575
	15.21	35.0675	48.5875	12.2525
	17.745	4.225	17.745	18.1675
	14.7875	10.14	16.4775	8.0275
	9.7175	7.605	46.475	32.5325
	10.14	8.8725	24.0825	13.0975
	10.14	17.3225	16.9	32.11
	14.7875	7.605	8.0275	24.505
	15.21	18.59	12.675	31.6875
	4.225	15.6325	13.9425	18.59
	8.8725	12.2525	25.35	14.7875
	8.45	6.3375	17.3225	14.365
	6.76	7.1825	17.3225	12.675
	10.14	14.365	27.4625	17.745
	19.8575	33.3775	17.745	17.3225
	5.07	16.9	34.2225	3.8025
	11.83	3.8025	17.745	30.42
	18.59	16.055	13.0975	32.11
	29.575	13.0975	15.21	20.7025
	10.14	16.4775	16.055	13.0975
	9.7175	35.49	27.885	10.985
	31.6875	9.295	45.2075	21.97
	4.6475	16.055	10.5625	10.985
	16.055	52.39	8.0275	14.7875
	13.0975	9.295	16.9	27.4625
	3.8025	10.5625	13.52	16.4775
	16.9	7.605	29.575	21.97
	12.2525	5.4925	15.21	12.675
	9.295	19.0125	8.0275	7.1825
	17.745	12.2525	11.4075	13.9425
	19.0125	11.83	8.8725	13.9425
	8.45	32.5325	8.45	8.45
	32.11	10.14	10.5625	10.14
	8.8725	8.0275	8.45	13.9425
	16.4775	31.6875	21.97	32.11
	10.14	7.1825	47.32	4.6475
	11.83	28.73	43.5175	10.14
	10.14	49.01	15.21	7.605
	17.3225	6.76	18.1675	19.435
	21.125	13.9425	8.45	32.5325
	8.45	22.3925	29.575	9.7175
	6.3375	10.985	11.83	43.94
	17.3225	3.8025	21.97	24.505
	15.6325	36.335	54.08	21.97
	9.295	4.6475	28.3075	19.435
	15.6325	15.6325	21.5475	8.45
	8.8725	14.7875	22.3925	16.4775
	8.0275	8.0275	11.4075	32.955
	19.0125	16.9	29.575	10.985
	6.76	23.66	29.1525	33.3775
	17.3225	21.5475	23.2375	28.3075
	14.365	10.14	31.6875	22.815
	15.6325	7.1825	44.3625	21.97
	33.3775	13.9425	34.645	24.505
	6.3375	11.83	8.0275	9.295
	10.14	35.9125	24.0825	36.7575
	7.1825	16.9	17.745	13.0975
	10.5625	21.5475	30.8425	14.7875
	9.295	20.7025	25.35	33.8
	20.28	18.59	17.745	14.7875
	16.4775	19.8575	16.4775	12.2525
	8.8725	26.195	27.04	20.28
	10.985	11.4075	12.2525	50.7
	16.055	3.8025	50.2775	13.0975
	7.1825	8.45	16.9	31.265
	19.0125	16.055	18.1675	8.0275
	12.675	12.675	12.2525	10.14
	8.8725	7.605	12.2525	32.5325
	10.14	16.055	13.0975	50.2775
	10.14	41.8275	13.0975	25.35
	8.45	9.295	20.7025	41.8275
	5.07	22.815	15.6325	26.6175
	7.605	8.8725	24.505	9.295
	18.59	8.8725	13.52	16.4775
	8.8725	8.0275	13.52	32.955
	18.1675	25.7725	12.675	12.675
	27.4625	24.505	29.1525	40.56
	9.7175	11.83	27.885	13.52
	8.45	7.1825	15.21	22.3925
	11.83	16.055	19.0125	43.095
	8.45	15.6325	29.9975	18.59
	11.83	22.3925	19.0125	11.83
	10.5625	3.8025	30.8425	26.6175
	20.28	26.195	24.9275	21.5475
	32.11	15.21	9.7175	3.8025
	8.8725	31.265	25.7725	10.985
	22.3925	12.2525	29.9975	12.675
	6.3375	7.1825	25.35	24.9275
	10.14	5.915	10.985	17.3225
	15.6325	20.7025	28.73	8.45
	9.7175	30.42	26.195	37.6025
	20.28	11.83	24.0825	28.3075
	10.5625	47.7425	12.675	14.365
	19.0125	19.435	5.915	12.2525
	9.295	12.2525	25.7725	11.83
	19.0125	18.1675	16.9	34.2225
	11.4075	28.73	10.5625	9.295
	12.2525	8.45	20.7025	13.9425
	12.675	7.605	14.7875	20.7025
	18.1675	3.8025	14.7875	33.8
	8.8725	10.985	13.9425	38.025
	17.3225	30.8425	15.6325	10.985
	13.0975	12.2525	27.885	9.295
	10.985	37.18	7.1825	10.985
	13.52	31.265	54.08	6.3375
	9.7175	4.225	14.7875	42.25
	22.3925	17.3225	35.49	20.7025
	11.83	5.915	24.505	12.675
	12.675	21.97	24.0825	48.5875
	13.9425	15.21	7.605	18.59
	16.9	5.07	29.575	21.97
	18.59	8.45	9.295	24.0825
	26.195	20.7025	31.265	11.4075
	16.4775	37.6025	21.125	22.815
	10.985	5.915	9.295	13.0975
	11.4075	34.645	16.9	21.5475
	13.0975	44.3625	15.6325	25.7725
	21.97	29.1525	14.365	9.7175
	23.66	8.0275	25.7725	13.9425
	9.7175	8.8725	26.6175	4.6475
	19.8575	24.505	24.9275	29.575
	10.14	30.8425	35.0675	40.1375
	13.0975	8.8725	29.575	37.6025
	10.985	14.7875	10.5625	17.745
	10.14	15.6325	6.76	11.4075
	10.14	5.915	46.8975	35.9125
	30.42	31.6875	28.73	21.97
	16.055	35.49	15.6325	29.9975
	7.1825	13.0975	27.885	8.8725
	10.14	20.28	16.055	21.5475
	20.7025	5.07	16.9	4.225
	10.5625	39.715	31.6875	7.1825
	25.35	34.645	17.745	31.6875
	28.73	34.645	22.815	21.5475
	10.14	20.28	19.8575	12.675
	11.4075	23.66	14.7875	11.83
	10.985	25.35	8.8725	15.21
	15.21	27.4625	29.9975	11.83
	22.815	13.52	9.7175	14.365
	11.83	45.63	8.8725	7.605
	21.5475	13.0975	14.7875	12.675
	19.0125	17.3225	16.4775	40.56
	8.45	27.04	14.365	19.0125
	15.21	15.6325	28.73	13.52
	12.2525	8.0275	51.1225	15.6325
	11.4075	11.4075	7.1825	17.745
	16.4775	17.745	27.885	18.1675
	11.4075	14.7875	26.195	12.2525
	32.955	25.7725	18.59	34.2225
	25.7725	46.0525	15.21	24.9275
	17.745	10.14	21.125	34.645
	9.7175	32.5325	29.9975	34.645
	10.14	15.21	13.52	12.2525
	26.6175	5.07	27.885	12.2525
	13.9425	13.9425	20.28	21.125
	26.195	17.3225	15.6325	41.8275
	10.14	13.0975	12.675	10.5625
	17.3225	17.745	22.815	12.675
	18.59	29.575	10.985	18.1675
	9.7175	26.6175	31.265	12.675
	20.7025	35.0675	8.45	14.7875
	6.76	16.055	10.985	12.675
	10.14	37.18	45.63	9.7175
	13.0975	29.9975	6.76	12.675
	18.59	37.18	54.925	11.4075
	22.815	14.365	8.8725	19.8575
	8.8725	12.2525	17.745	10.985
	20.28	49.4325	13.52	15.21
	25.35	29.1525	15.6325	11.83
	16.9	54.08	17.3225	29.9975
	8.8725	9.7175	19.0125	11.83
	9.7175	8.8725	17.745	38.025
	16.9	29.9975	46.475	24.9275
	7.605	13.9425	6.3375	31.265
	21.5475	13.52	27.885	12.2525
	17.745	21.125	14.7875	11.4075
	10.14	10.5625	13.9425	42.6725
	31.6875	29.9975	23.2375	6.76
	10.5625	53.6575	15.21	10.985
	13.9425	38.4475	29.575	23.2375
	7.605	6.76	27.4625	18.1675
	28.3075	27.04	29.1525	17.745
	23.2375	35.9125	15.6325	5.915
	12.675	10.5625	10.14	34.645
	17.745	23.66	30.42	11.83
	17.745	24.9275	10.14	19.8575
	20.28	29.575	10.985	15.6325
	9.7175	47.32	28.3075	50.2775
	14.7875	17.745	8.45	19.8575
	21.97	18.59	29.9975	22.3925
	19.435	29.9975	8.45	13.52
	20.7025	27.04	16.4775	37.6025
	6.76	18.1675	16.055	4.225
	19.8575	17.3225	33.3775	9.295
	19.8575	29.575	31.265	35.0675
	16.055	34.2225	8.8725	24.0825
	12.675	12.675	14.365	25.35
	21.97	37.6025	39.2925	13.0975
	12.2525	38.87	14.7875	34.2225
	14.365	40.1375	35.9125	27.4625
	12.675	38.4475	5.915	14.365
	13.9425	17.745	5.915	18.1675
	21.97	12.2525	18.1675	45.63
	13.9425	17.745	7.605	12.2525
	10.14	13.52	9.295	31.6875
	14.365	15.21	23.2375	10.985
	10.5625	32.955	27.885	12.2525
	7.1825	15.21	10.5625	47.32
	16.4775	29.1525	27.04	24.505
	12.675	18.59	17.3225	15.21
	7.605	30.42	36.335	14.7875
	11.4075	17.3225	6.3375	22.815
	9.7175	10.14	12.2525	13.52
	10.5625	31.6875	14.7875	33.8
	11.83	14.365	11.4075	12.675
	10.5625	13.9425	9.7175	13.0975
	10.14	16.9	15.21	35.9125
	8.45	18.1675	19.435	20.7025
	11.83	18.1675	28.3075	44.785
	20.28	53.235	18.59	12.675
	11.83	30.42	24.0825	35.49
	7.605	44.785	45.63	10.985
	8.0275	29.1525	35.0675	38.025
	10.985	29.575	31.6875	13.0975
	32.11	45.2075	18.1675	39.2925
	13.52	16.055	19.0125	17.3225
	13.52	10.985	9.295	41.405
	16.9	10.14	18.1675	19.8575
	11.4075	11.83	20.28	12.2525
	14.7875	9.295	11.4075	26.195
	12.2525	16.4775	49.01	12.2525
	21.97	35.49	32.11	22.815
	12.675	8.45	29.1525	12.2525
	22.3925	8.8725	34.2225	39.2925
	8.45	8.45	21.5475	12.2525
	27.04	11.4075	19.0125	12.675
	24.505	12.2525	31.265	12.2525
	10.5625	26.6175	8.8725	6.3375
	9.295	31.265	37.18	21.125
	11.83	19.435	13.0975	6.3375
	8.0275	31.265	40.56	14.365
	20.28	11.4075	49.01	20.28
	19.0125	37.6025	13.52	11.4075
	10.5625	9.7175	8.45	47.7425
	22.815	20.28	9.295	26.195
	27.885	44.785	16.9	24.0825
	23.66	7.1825	7.605	18.1675
	8.0275	12.675	23.66	13.52
	19.8575	34.2225	10.5625	14.7875
	9.7175	42.6725	32.955	24.0825
	17.3225	51.9675	29.1525	36.7575
	24.505	37.6025	37.6025	22.3925
	12.2525	9.7175	21.5475	19.435
	13.9425	22.815	13.0975	9.295
	10.14	11.83	18.59	20.28
	12.675	10.985	18.59	8.0275
	9.295	3.8025	9.295	11.83
	19.435	32.5325	16.4775	11.83
	21.97	31.265	8.45	11.83
	19.435	14.7875	31.265	33.8
	18.1675	13.52	43.94	32.5325
	8.8725	40.56	52.39	13.9425
	11.83	46.8975	14.365	46.0525
	9.7175	39.2925	18.59	43.94
	30.42	23.2375	31.6875	32.955
	19.0125	16.055	19.8575	13.9425
	14.7875	51.545	18.59	21.125
	33.3775	44.3625	19.8575	13.9425
	12.2525	52.39	34.645	10.985
	17.745	8.8725	13.52	23.2375
	16.4775	35.49	16.4775	10.14
	14.7875	20.28	34.645	24.0825
	17.745	22.3925	10.5625	16.4775
	17.745	15.6325	11.4075	15.6325
	12.675	24.505	46.475	10.985
	33.8	9.7175	27.4625	16.055
	28.3075	13.52	18.1675	10.5625
	15.6325	29.575	10.5625	10.985
	10.985	18.1675	25.7725	32.11
	10.14	13.0975	19.0125	14.7875
	13.9425	21.125	16.9	35.0675
	12.2525	43.5175	10.5625	12.2525
	12.675	28.73	38.025	3.8025
	11.83	22.3925	32.5325	40.9825
	18.1675	9.295	14.7875	12.675
	8.8725	29.575	8.45	12.2525
	8.45	18.1675	40.1375	9.295
	15.21	13.9425	16.9	37.6025
	16.055	32.11	25.35	23.66
	11.4075	29.9975	16.9	13.9425
	7.1825	36.335	28.3075	21.97
	8.0275	32.11	25.35	16.4775
	10.14	8.45	8.45	31.6875
	8.45	12.2525	12.2525	10.985
	21.97	8.8725	27.885	24.0825
	9.295	47.32	19.435	18.1675
	9.295	9.295	11.83	21.97
	7.605	51.9675	11.4075	33.3775
	16.4775	29.9975	27.885	7.1825
	8.45	30.8425	27.885	14.7875
	13.52	4.225	19.0125	5.4925
	10.5625	12.675	16.055	11.83
	8.8725	27.04	9.295	25.7725
	7.1825	33.3775	11.83	12.675
	25.35	27.4625	45.63	19.0125
	8.8725	11.4075	13.9425	30.8425
	12.2525	10.14	10.5625	14.7875
	11.4075	7.605	19.435	32.5325
	32.11	46.8975	21.125	47.7425
	10.14	47.32	28.73	47.7425
	5.915	22.3925	12.2525	47.7425
	16.9	27.04	48.165	9.7175
	8.8725	45.2075	16.9	51.1225
	11.4075	23.2375	12.2525	32.11
	9.295	28.3075	15.21	15.6325
	8.45	37.6025	26.6175	12.2525
	10.5625	41.405	20.28	13.9425
	10.14	48.5875	32.5325	11.4075
	7.605	12.675	45.2075	26.195
	7.1825	17.3225	18.59	10.14
	10.5625	13.9425	10.5625	19.8575
	9.295	5.07	9.7175	16.055
	10.5625	23.66	18.59	26.6175
	8.0275	18.1675	10.14	11.4075
	9.7175	20.7025	24.0825	8.8725
	15.6325	29.1525	17.745	4.6475
	9.7175	10.985	4.6475	11.4075
	15.6325	25.7725	18.59	7.1825
	10.5625	29.1525	8.0275	12.2525
	10.985	13.52	22.3925	11.4075
	10.14	13.0975	15.6325	26.195
	22.815	51.1225	35.49	47.7425
	30.42	10.985	21.97	9.7175
	10.5625	29.575	18.1675	21.125
	6.76	50.7	16.055	18.1675
	9.7175	35.49	21.125	12.2525
	19.8575	18.59	43.095	38.87
	16.4775	19.0125	13.0975	41.405
	9.7175	20.7025	25.7725	19.0125
	9.295	14.7875	50.2775	13.9425
	16.055	12.675	13.0975	12.2525
	12.675	19.0125	21.125	11.4075
	9.7175	20.28	23.2375	35.9125
	8.45	6.3375	30.8425	10.5625
	10.5625	8.8725	12.675	7.605
	19.0125	35.49	12.2525	33.8
	9.295	10.985	19.435	22.815
	9.295	14.7875	12.2525	17.745
	14.365	30.8425	11.4075	6.76
	7.1825	45.2075	10.14	10.985
	21.125	5.915	8.8725	12.675
	9.295	7.605	19.8575	9.7175
	11.83	38.025	6.3375	13.9425
	9.295	34.645	10.5625	11.4075
	12.2525	11.4075	46.8975	18.59
	9.295	26.6175	19.0125	10.5625
	19.8575	24.0825	14.7875	10.14
	9.7175	32.11	18.1675	17.3225
	9.7175	22.815	22.3925	10.14
	15.6325	40.1375	34.645	11.83
	9.295	33.8	8.8725	36.7575
	9.295	30.42	20.7025	10.985
	8.45	9.7175	13.0975	10.14
	12.2525	36.7575	8.0275	6.76
	27.04	8.45	12.675	8.8725
	15.6325	17.3225	29.9975	8.45
	10.5625	13.0975	10.14	10.5625
	8.45	9.295	9.7175	11.4075
	16.9	30.42	22.3925	11.4075
	8.8725	10.14	23.2375	7.1825
	9.295	8.0275	20.28	48.165
	8.45	10.5625	9.7175	13.0975
	8.45	9.7175	3.8025	12.675
	11.4075	6.3375	15.6325	10.5625
	18.59	46.0525	16.4775	22.815
	7.605	8.45	34.2225	9.295
	11.83	44.785	54.925	21.5475
	11.83	19.8575	16.9	13.52
	8.45	6.3375	12.2525	11.83
	10.985	11.4075	30.8425	11.83
	11.83	38.87	51.545	48.165
	10.14	10.14	52.8125	10.985
	14.365	24.0825	12.2525	8.8725
	14.365	16.9	16.4775	18.59
	13.9425	15.6325	21.125	10.5625
	26.6175	23.66	31.265	8.45
	10.5625	26.195	24.505	19.0125
	8.45	6.76	21.97	14.365
	16.055	12.2525	16.055	23.66
	21.97	35.0675	40.9825	8.0275
	12.675	30.42	8.0275	30.42
	10.14	34.645	17.745	9.295
	8.8725	50.7	15.21	13.9425
	27.4625	27.4625	17.745	21.5475
	11.4075	22.815	8.45	24.505
	10.14	20.7025	35.49	18.59
	12.675	20.7025	22.815	8.45
	10.5625	22.3925	17.745	16.055
	9.295	30.8425	29.9975	8.8725
	6.76	37.18	10.14	12.2525
	9.7175	15.6325	7.605	7.1825
	13.0975	52.8125	21.5475	19.435
	27.04	13.9425	12.2525	9.7175
	13.9425	39.2925	40.56	11.83
	10.14	5.915	21.125	9.7175
	17.3225	26.6175	21.125	21.97
	12.675	18.1675	37.18	24.505
	11.83	33.3775	7.605	34.645
	10.5625	24.505	38.87	11.4075
	19.8575	9.295	19.0125	10.14
	26.6175	27.885	34.2225	13.0975
	21.125	29.575	54.925	27.04
	9.7175	51.9675	13.9425	15.21
	14.365	10.14	19.0125	9.7175
	8.0275	24.9275	20.28	8.45
	5.915	14.7875	24.505	21.125
	9.295	35.49	5.915	43.94
	15.6325	16.9	11.83	11.4075
	14.365	28.3075	16.055	16.9
	31.6875	23.2375	21.97	10.14
	16.055	33.3775	15.6325	27.885
	16.4775	15.6325	29.9975	8.8725
	8.8725	19.435	18.59	15.6325
	12.2525	32.11	11.83	13.0975
	6.3375	12.2525	27.885	13.52
	10.14	32.5325	10.5625	16.4775
	15.6325	29.575	14.365	5.915
	9.7175	32.5325	9.295	10.985
	9.295	7.1825	29.575	20.28
	7.605	51.1225	14.7875	26.6175
	13.9425	9.295	9.295	12.2525
	11.83	17.745	34.2225	21.125
	11.4075	40.9825	18.1675	8.8725
	10.5625	37.18	11.4075	14.7875
	10.5625	4.225	13.9425	12.675
	14.7875	36.7575	17.745	22.815
	9.295	44.785	24.9275	11.83
	14.365	12.675	26.6175	22.3925
	9.7175	8.45	19.435	9.7175
	7.1825	5.915	21.5475	7.1825
	12.675	5.915	7.605	10.14
	8.0275	25.35	5.4925	9.7175
	10.985	34.2225	33.3775	23.66
	10.985	20.28	13.9425	14.7875
	20.28	30.42	21.97	22.815
	33.3775	16.9	43.5175	9.7175
	21.97	46.0525	8.0275	33.8
	19.435	10.5625	8.45	12.675
	8.45	27.04	11.83	12.675
	13.52	21.5475	22.3925	17.3225
	9.7175	7.605	27.4625	9.7175
	10.14	22.3925	10.985	20.7025
	14.7875	11.83	27.4625	21.125
	24.0825	11.4075	8.8725	15.6325
	9.295	17.745	21.97	9.7175
	8.8725	30.8425	27.885	24.0825
	10.14	21.125	18.59	21.97
	19.435	7.1825	15.6325	10.5625
	7.1825	9.295	7.605	8.0275
	9.295	34.2225	7.605	13.9425
	12.675	12.2525	8.8725	43.94
	3.8025	14.365	20.7025	37.18
	15.21	51.545	18.1675	9.7175
	7.1825	18.1675	49.855	25.7725
	9.7175	9.295	17.3225	25.7725
	8.8725	29.9975	38.4475	5.915
	7.1825	11.4075	18.1675	34.645
	17.745	21.97	10.14	20.7025
	13.0975	7.605	18.1675	17.745
	16.9	13.52	9.7175	24.9275
	27.4625	35.0675	43.94	26.195
	17.3225	20.28	13.0975	33.8
	18.59	12.675	16.9	8.0275
	21.97	40.56	17.745	9.295
	20.7025	21.5475	20.28	43.94
	17.3225	24.0825	34.645	46.0525
	6.76	30.8425	40.1375	26.6175
	22.3925	15.6325	20.7025	9.7175
	17.745	21.5475	10.14	15.21
	20.28	7.1825	20.28	19.435
	29.575	18.1675	24.0825	13.52
	13.9425	24.505	4.6475	9.7175
	6.76	14.365	7.605	13.52
	19.8575	27.885	19.8575	21.5475
	7.1825	41.405	16.9	10.14
	8.45	15.6325	19.435	9.7175
	13.0975	51.9675	4.6475	7.1825
	12.675	35.0675	7.605	15.6325
	22.815	31.265	40.56	15.21
	10.14	33.3775	10.985	8.45
	15.6325	41.8275	17.745	7.1825
	17.3225	8.0275	27.04	18.1675
	27.885	3.8025	6.3375	27.885
	5.915	23.2375	14.365	31.265
	20.28	13.9425	14.365	36.7575
	20.7025	12.675	14.365	21.5475
	8.0275	44.785	27.04	22.3925
	19.0125	13.9425	50.2775	23.66
	16.9	44.3625	35.9125	32.11
	16.9	8.45	25.35	21.5475
	21.125	7.605	36.7575	37.6025
	9.295	52.8125	13.9425	29.9975
	23.2375	32.5325	15.6325	11.83
	10.985	13.52	23.2375	13.0975
	14.7875	14.365	28.73	16.055
	13.9425	16.9	31.6875	13.9425
	13.0975	36.335	21.97	39.715
		32.11	27.885	40.1375
		32.5325	38.025	8.0275
		5.07	7.1825	10.14
		28.73	35.49	28.73
		30.8425	32.11	14.7875
		33.3775	4.225	5.915
		16.055	5.915	36.335
		5.915	23.2375	17.3225
		28.73	8.0275	19.8575
		24.0825	5.07	33.3775
		15.21	31.265	50.7
		9.295	4.6475	16.055
		30.8425	34.2225	37.6025
		29.9975	5.4925	20.7025
		5.915	3.8025	8.0275
		6.3375	32.11	12.2525
		8.8725	26.6175	16.055
		16.4775	42.6725	6.76
		5.4925	11.4075	16.9
		18.1675	30.42	12.2525
		13.9425	18.1675	12.675
		11.4075	10.5625	41.405
		31.6875	38.4475	23.66
		22.815	17.745	30.8425
		15.21	9.7175	13.9425
		20.7025	39.2925	8.0275
		15.6325	36.335	45.2075
		6.76	16.9	8.45
		8.0275	17.745	3.8025
		40.56	35.0675	17.745
		14.365	15.6325	37.18
		14.365	36.7575	19.0125
		7.605	3.8025	12.2525
		8.8725	30.8425	36.335
		14.365	37.18	44.785
		16.055	32.5325	35.49
		4.6475	8.8725	18.1675
		18.1675	29.1525	41.8275
		5.915	36.7575	26.195
		21.125	27.4625	18.1675
		23.2375	31.265	9.7175
		5.915	13.0975	5.915
		15.21	33.3775	12.2525
		6.3375	15.6325	10.985
		47.7425	42.6725	24.9275
		11.4075	11.83	27.04
		32.11	33.3775	28.3075
		36.335	28.3075	27.4625
		52.39	16.4775	37.18
		10.985	30.8425	49.4325
		9.7175	5.07	18.59
		28.73	35.0675	18.59
		11.83	36.335	32.11
		7.605	9.7175	5.07
		7.1825	34.645	9.7175
		10.985	10.5625	9.295
		32.955	35.49	17.745
		22.815	28.73	11.83
		32.955	28.73	46.475
		38.4475	21.125	9.7175
		11.4075	12.2525	8.0275
		15.21	15.21	9.7175
		10.14	11.83	16.9
		29.1525	41.8275	12.2525
		10.5625	35.0675	9.7175
		27.04	21.97	11.83
		43.095	4.6475	13.52
		51.545	10.985	22.815
		29.1525	29.575	16.055
		10.14	38.4475	30.42
		31.265	33.8	11.83
		19.8575	21.125	38.4475
		40.9825	17.745	13.0975
		11.4075	55.77	16.055
		34.2225	21.125	33.3775
		44.3625	10.5625	29.1525
		17.745	19.435	9.295
		42.6725	19.0125	13.52
		27.04	8.45	20.7025
		42.25	32.11	9.295
		25.7725	16.4775	10.985
		10.14	45.63	8.8725
		30.8425	17.745	13.0975
		12.675	40.9825	48.165
		24.505	9.7175	19.8575
		12.2525	5.4925	11.4075
		19.0125	18.59	21.125
		13.9425	6.76	30.42
		27.885	30.42	20.28
		36.7575	32.955	20.7025
		40.9825	21.125	6.3375
		19.435	12.675	35.9125
		19.435	17.3225	13.0975
		8.0275	16.055	7.1825
		10.5625	20.7025	34.645
		13.52	19.0125	8.0275
		9.7175	30.42	36.335
		24.9275	9.295	11.4075
		10.985	16.055	23.2375
		3.38	30.42	26.195
		32.5325	26.195	10.5625
		17.3225	11.4075	11.4075
		20.7025	7.605	21.125
		10.985	32.11	11.4075
		29.1525	10.985	23.66
		32.5325	32.955	22.815
		8.8725	52.8125	6.3375
		39.2925	30.8425	15.6325
		21.97	27.4625	10.5625
		47.32	23.66	35.9125
		10.14	34.645	9.295
		20.28	22.3925	21.125
		13.52	27.04	38.025
		11.4075	10.14	14.7875
		16.4775	15.21	21.97
		21.5475	10.14	48.165
		6.76	11.4075	23.2375
		11.83	31.6875	22.3925
		44.3625	25.7725	22.3925
		28.3075	8.0275	27.04
		7.605	35.0675	4.6475
		18.1675	10.985	20.28
		7.605	22.3925	40.9825
		9.7175	21.97	5.915
		28.73	39.715	20.7025
		21.125	11.4075	11.4075
		8.0275	11.4075	14.7875
		37.6025	12.675	13.9425
		47.7425	13.0975	40.1375
		24.0825	14.365	14.365
		12.2525	35.0675	11.4075
		29.1525	10.985	33.3775
		12.2525	34.2225	9.295
		52.39	21.5475	16.9
		22.3925	33.3775	20.7025
		9.295	5.4925	42.25
		9.295	20.28	32.5325
		31.6875	12.2525	5.07
		47.7425	40.1375	16.9
		9.7175	10.985	16.4775
		27.4625	21.97	37.18
		26.195	19.435	10.14
		19.435	18.1675	8.0275
		33.8	10.985	35.9125
		6.76	11.83	29.1525
		19.435	21.125	8.45
		11.4075	31.265	15.21
		8.8725	19.435	11.4075
		13.9425	17.3225	18.59
		10.14	18.1675	29.1525
		9.7175	11.4075	14.365
		13.52	21.5475	39.715
		16.4775	39.715	40.56
		15.21	22.815	18.1675
		18.1675	38.4475	40.1375
		17.3225	16.9	10.985
		44.3625	10.14	40.9825
		22.815	5.07	37.18
		9.295	30.42	27.04
		52.8125	10.14	34.2225
		13.9425	17.745	13.52
		30.8425	13.0975	13.52
		12.675	3.8025	6.3375
		8.8725	15.21	35.0675
		7.605	33.3775	32.5325
		38.87	28.3075	23.66
		8.0275	35.49	26.6175
		32.955	37.6025	10.5625
		12.2525	9.295	19.435
		43.095	35.49	27.04
		25.35	10.14	32.11
		41.8275	15.21	17.3225
		8.0275	34.645	13.0975
		28.73	9.7175	35.0675
		25.7725	24.9275	6.76
		16.4775	18.1675	24.505
		27.4625	13.0975	9.7175
		9.7175	7.605	35.0675
		13.9425	16.9	48.165
		31.6875	29.1525	3.8025
		35.9125	22.815	9.7175
		15.6325	10.5625	46.8975
		15.6325	29.1525	7.1825
		17.745	19.435	24.0825
		14.365	33.3775	41.8275
		10.5625	27.885	30.42
		14.7875	46.475	37.18
		45.63	29.9975	18.59
		51.1225	10.14	11.83
		31.265	46.0525	12.2525
		12.675	27.4625	10.14
		34.645	53.235	40.56
		21.125	24.9275	22.815
		51.9675	19.8575	28.3075
		20.28	35.49	49.01
		13.9425	10.14	5.4925
		16.4775	19.8575	14.7875
		33.8	46.8975	8.0275
		21.5475	30.8425	13.52
		24.505	18.59	20.7025
		49.4325	8.0275	30.8425
		11.4075	18.1675	16.9
		22.3925	24.505	7.1825
		10.985	12.675	10.14
		15.6325	35.49	21.97
		24.0825	42.6725	16.4775
		36.7575	24.505	11.83
		21.97	23.2375	17.745
		3.8025	17.3225	9.7175
		24.9275	22.815	8.45
		9.7175	9.7175	7.605
		14.365	11.83	26.6175
		13.9425	10.14	5.915
		40.9825	8.0275	5.07
		19.0125	9.7175	29.9975
		9.295	12.675	41.405
		44.3625	19.8575	32.11
		26.6175	17.745	7.605
		19.435	23.66	10.985
		24.505	16.9	29.9975
		27.4625	7.605	12.675
		38.87	13.9425	15.21
		10.14	15.21	15.6325
		5.07	27.04	26.195
		33.8	19.0125	8.8725
		13.0975	6.3375	8.45
		27.04	16.4775	8.8725
		48.5875	3.8025	11.4075
		14.7875	9.295	10.14
		31.6875	8.8725	21.97
		32.955	43.94	24.505
		16.9	40.9825	40.56
		10.14	47.7425	22.815
		5.07	18.59	15.6325
		10.985	7.605	25.7725
		11.83	9.7175	26.6175
		8.0275	21.125	35.49
		10.985	13.0975	24.505
		37.6025	48.5875	13.9425
		14.7875	8.45	13.0975
		6.3375	15.6325	13.9425
		15.21	6.3375	10.985
		15.21	33.8	40.1375
		18.1675	35.49	10.5625
		12.2525	38.4475	10.985
		33.3775	13.0975	13.52
		7.605	19.8575	32.11
		22.815	20.28	10.5625
		34.2225	17.745	15.21
		50.2775	16.9	16.4775
		10.14	10.5625	14.365
		17.745	13.52	12.675
		8.45	8.45	9.295
		4.225	7.1825	16.055
		14.365	6.3375	11.83
		19.0125	16.9	7.605
		36.7575	27.885	12.675
		26.6175	8.45	16.9
		10.14	8.0275	7.1825
		9.295	8.8725	20.28
		7.605	35.49	24.505
		37.18	6.3375	12.2525
		45.2075	4.225	19.0125
		33.8	8.8725	4.6475
		6.76	14.365	8.45
		8.8725	29.575	11.83
		50.7	7.1825	16.9
		27.4625	8.8725	15.6325
		25.35	8.0275	18.1675
		17.3225	16.055	9.295
		19.0125	24.0825	14.365
		43.5175	33.8	12.675
		10.985	37.6025	6.3375
		24.0825	11.4075	12.675
		8.45	31.6875	16.9
		10.985	16.9	33.8
		18.1675	37.6025	15.6325
		18.59	31.265	8.8725
		43.94	37.18	8.45
		32.955	34.2225	10.14
		21.97	10.14	17.3225
		13.52	7.605	10.985
		31.265	44.3625	19.0125
		6.76	7.605	7.1825
		29.1525	30.8425	8.0275
		38.025	31.6875	16.055
		13.9425	14.365	9.295
		27.885	38.4475	29.575
		19.8575	25.35	7.605
		19.0125	6.76	18.59
		30.8425	19.8575	13.0975
		45.63	39.2925	16.055
		32.5325	36.7575	6.3375
		8.0275	32.5325	18.1675
		10.5625	17.3225	7.1825
		37.6025	21.125	43.095
		19.435	32.5325	15.21
		26.6175	7.1825	13.0975
		16.055	9.295	9.295
		21.97	20.28	16.055
		41.405	18.59	47.7425
		16.055	15.21	5.915
		28.73	33.3775	14.7875
		35.49	34.645	5.4925
		7.605	13.52	8.8725
		13.0975	10.5625	3.8025
		16.9	20.28	23.66
		8.45	13.9425	9.295
		17.3225	5.915	27.4625
		28.73	35.0675	13.9425
		21.125	29.9975	21.5475
		8.8725	35.9125	17.3225
		10.14	22.3925	21.125
		18.1675	21.125	20.28
		9.295	24.505	35.0675
		10.5625	26.195	21.5475
		44.3625	19.8575	8.45
		17.3225	18.1675	48.5875
		10.5625	4.6475	24.505
		19.8575	20.28	29.575
		10.985	19.0125	19.8575
		10.14	46.475	44.785
		7.605	8.45	8.8725
		38.4475	36.335	32.11
		8.8725	56.1925	46.475
		38.025	13.52	16.4775
		29.9975	54.925	20.28
		19.8575	6.76	10.985
		19.435	37.18	16.4775
		32.5325	49.4325	19.8575
		10.985	32.11	12.675
		10.5625	36.7575	9.295
		19.435	43.94	20.28
		24.9275	24.0825	8.8725
		25.35	6.3375	8.0275
		9.7175	51.1225	17.745
		19.8575	12.675	10.14
		16.9	15.21	8.0275
		10.985	49.855	45.63
		8.8725	26.195	8.0275
		18.1675	32.11	38.4475
		24.505	17.745	8.0275
		29.9975	19.0125	10.14
		9.7175	24.0825	14.365
		10.14	40.9825	18.1675
		9.295	17.745	10.5625
		11.83	36.7575	20.7025
		37.6025	24.0825	21.125
		9.7175	21.125	16.9
		17.745	4.6475	5.4925
		17.745	27.4625	13.52
		11.83	19.435	23.2375
		16.9	22.815	20.7025
		12.2525	16.055	16.055
		13.52	15.21	9.295
		8.0275	40.1375	40.9825
		9.295	19.0125	10.5625
		19.435	4.225	12.2525
		7.605	10.5625	27.885
		13.52	19.8575	23.2375
		30.8425	29.1525	17.3225
		22.815	50.2775	11.83
		36.7575	27.885	17.745
		26.6175	32.955	31.265
		49.4325	17.3225	10.14
		21.125	21.5475	31.265
		29.9975	16.9	24.0825
		9.7175	9.295	19.435
		21.125	47.32	44.3625
		17.3225	5.915	6.76
		31.265	29.1525	10.5625
		18.1675	32.11	28.73
		20.28	13.0975	19.435
		16.9	13.52	33.8
		10.14	19.435	10.14
		30.42	44.3625	18.1675
		10.985	5.4925	12.2525
		20.28	7.605	46.8975
		8.8725	30.42	9.295
		36.7575	54.08	25.35
		6.76	10.5625	9.295
		29.575	46.475	20.28
		9.7175	8.0275	32.955
		35.49	5.07	9.295
		9.295	18.1675	30.8425
		13.0975	27.04	11.4075
		37.18	16.055	16.055
		9.295	52.8125	35.0675
		5.4925	16.4775	8.45
		13.0975	18.59	16.9
		9.7175	24.505	9.295
		9.295	16.9	25.35
		15.21	18.1675	7.605
		10.985	30.8425	11.4075
		50.7	24.0825	7.605
		46.475	23.66	16.9
		12.675	24.505	31.6875
		27.885	31.265	12.675
		19.8575	15.6325	11.83
		4.6475	13.52	17.745
		14.7875	19.8575	24.0825
		31.265	35.9125	19.8575
		9.7175	10.5625	19.8575
		15.21	11.4075	9.295
		8.45	10.14	16.4775
		5.915	19.0125	8.0275
		19.8575	55.3475	7.605
		30.8425	29.575	34.645
		8.8725	15.21	14.365
		23.66	14.365	24.9275
		13.52	27.04	13.0975
		12.2525	7.1825	17.3225
		28.3075	10.5625	17.3225
		40.56	7.605	6.3375
		17.3225	40.1375	14.365
		22.3925	17.745	43.94
		9.7175	30.42	8.45
		19.0125	9.7175	6.76
		23.2375	21.97	4.225
		29.575	19.435	29.9975
		8.45	15.6325	16.4775
		8.0275	31.265	27.04
		10.5625	10.5625	8.8725
		20.7025	14.365	10.5625
		15.21	13.52	17.745
		10.5625	29.575	8.0275
		16.4775	29.1525	22.3925
		29.575	5.4925	31.265
		32.5325	10.5625	29.575
		13.9425	17.745	19.0125
		8.8725	14.365	8.0275
		22.3925	17.3225	16.9
		10.14	25.7725	31.6875
		5.915	15.6325	9.7175
		31.6875	8.0275	8.8725
		9.295	13.9425	28.73
		22.815	11.83	13.9425
		38.87	16.9	32.11
		7.1825	51.1225	9.295
		15.6325	15.6325	47.7425
		18.1675	15.21	11.4075
		37.6025	19.435	31.265
		20.28	21.125	32.955
		25.7725	7.605	28.3075
		10.14	28.3075	15.21
		8.0275	15.6325	3.8025
		18.1675	10.14	4.6475
		15.21	16.4775	21.97
		7.605	29.575	10.985
		18.59	24.505	33.3775
		10.985	19.8575	18.1675
		9.295	4.6475	49.855
		8.8725	3.8025	10.985
		9.7175	15.21	10.985
		16.4775	32.955	38.025
		21.97	8.45	27.885
		17.745	20.28	14.365
		6.76	35.0675	30.42
		10.14	47.32	11.83
		8.0275	17.3225	9.7175
		6.76	7.605	10.5625
		42.6725	15.21	34.645
		8.8725	19.8575	28.73
		52.8125	12.675	20.7025
		14.365	5.915	11.4075
		21.125	17.3225	14.7875
		29.575	42.6725	32.955
		32.5325	24.0825	16.055
		16.055	7.605	19.435
		24.505	6.3375	30.42
		20.7025	11.4075	31.265
		11.4075	24.0825	18.59
		13.52	21.5475	33.3775
		14.7875	13.9425	19.435
		7.605	49.855	16.9
		9.7175	13.0975	35.0675
		8.8725	16.4775	32.955
		25.35	22.815	15.6325
		11.83	12.2525	3.8025
		17.3225	15.21	14.365
		37.6025	28.73	16.4775
		18.59	15.21	18.59
		26.6175	12.2525	38.025
		13.0975	24.505	9.295
		8.8725	13.9425	24.0825
		28.3075	12.675	22.3925
		22.815	14.7875	19.0125
		19.8575	21.125	7.605
		9.295	27.885	15.6325
		10.14	20.28	21.125
		12.675	22.3925	4.225
		8.45	8.8725	16.9
		17.745	8.0275	28.3075
		28.73	50.2775	39.2925
		10.5625	27.04	10.14
		10.14	18.1675	10.5625
		9.295	8.45	22.815
		19.0125	8.8725	15.6325
		13.0975	36.335	32.11
		10.5625	11.4075	18.1675
		14.365	17.3225	7.1825
		9.295	24.505	17.745
		20.7025	17.745	15.6325
		9.7175	33.8	19.0125
		16.4775	17.3225	12.675
		12.675	16.4775	29.1525
		8.45	14.7875	11.4075
		9.295	30.42	12.2525
		10.985	19.435	4.225
		27.4625	4.225	17.3225
		20.7025	24.505	29.1525
		16.9	10.985	6.76
		16.9	51.1225	16.4775
		19.0125	24.0825	8.0275
		27.04	27.885	18.1675
		7.1825	9.295	12.2525
		13.9425	8.0275	16.4775
		21.5475	5.4925	8.0275
		16.4775	13.9425	13.9425
		10.14	22.815	18.1675
		10.985	19.0125	10.5625
		21.5475	13.52	10.14
		13.0975	26.195	8.0275
		9.295	22.3925	37.6025
		18.59	14.365	29.9975
		40.9825	36.7575	10.14
		28.3075	25.7725	12.675
		18.59	24.0825	36.7575
		31.265	5.915	37.6025
		8.45	12.675	6.3375
		49.01	23.2375	6.3375
		12.675	33.3775	6.76
		5.4925	16.055	34.2225
		12.2525	5.4925	11.4075
		12.2525	29.1525	11.83
		10.14	22.815	36.335
		32.5325	19.0125	8.8725
		19.8575	12.675	21.125
		33.8	7.605	24.0825
		13.9425	13.0975	8.0275
		24.0825	11.83	20.7025
		20.7025	14.7875	35.9125
		16.055	13.9425	8.0275
		16.4775	24.9275	7.1825
		10.985	24.9275	4.6475
		29.9975	26.195	8.45
		33.3775	13.52	7.605
		25.35	22.3925	11.4075
		11.4075	13.9425	7.1825
		12.675	49.01	6.76
		10.985	13.9425	7.1825
		11.83	23.2375	9.295
		30.8425	15.21	9.7175
		24.0825	10.5625	28.73
		19.8575	54.5025	28.73
		27.4625	13.0975	8.0275
		4.225	10.14	19.8575
		7.1825	7.1825	30.42
		3.8025	17.3225	20.28
		43.5175	19.435	10.5625
		10.5625	20.7025	7.1825
		16.4775	10.14	10.14
		12.2525	12.675	15.21
		10.985	12.2525	9.7175
		54.925	10.985	16.4775
		17.745	11.4075	25.7725
		13.0975	10.14	8.45
		21.97	10.985	13.52
		29.9975	6.3375	36.7575
		10.14	19.0125	9.7175
		13.52	24.0825	21.125
		17.3225	35.9125	15.21
		21.125	24.9275	21.125
		29.1525	12.675	6.76
		11.4075	13.52	13.9425
		10.14	8.8725	10.985
		19.8575	13.9425	9.295
		18.1675	24.505	6.76
		30.8425	11.83	17.3225
		21.5475	12.675	21.97
		13.52	10.14	10.5625
		21.125	16.9	7.1825
		12.2525	16.055	8.0275
		10.5625	19.0125	7.605
		17.745	11.83	7.605
		24.505	12.2525	9.295
		13.0975	17.745	11.83
		29.1525	11.4075	16.055
		44.785	34.645	14.7875
		7.605	36.335	31.6875
		16.9	19.8575	7.1825
		13.52	19.8575	6.76
		13.52	34.645	10.14
		15.21	21.125	17.745
		34.645	11.83	6.76
		52.8125	19.0125	10.985
		21.97	12.2525	32.955
		12.675	11.4075	10.985
		27.4625	11.4075	8.0275
		34.2225	24.0825	8.8725
		11.4075	23.66	8.8725
		21.97	10.5625	4.6475
		50.7	21.5475	9.295
		31.6875	14.7875	42.6725
		21.97	11.4075	48.165
		14.7875	11.83	9.7175
[truncated: 975 more rows]
