# Supplementary material for: An improved organ explant culture method reveals stem cell lineage dynamics in the adult Drosophila intestine
Source: eLife. 2022 Aug 25;11:e76010. doi: 10.7554/eLife.76010 (PMC9578704; doi:10.7554/eLife.76010)
Supplement: Figure 3—source data 1. [file elife-76010-fig3-data1.xlsx]

## Sheet: Fig. 3D
		Time (h)	0	1	2	3	4	5	6	7	8	9	10	11	12	13	14	15	16	17	18	19	20	21	22	23	24	25	26	27	28	29	30	31	32	33	34	35	36	37	38	39	40	41	42	43	44	45	46
	Area (µm2)	Rep 1	6.954	7.0256	7.1644	8.2456	6.8352	5.726	5.2624	5.6932	5.8608	7.7984	6.1396	6.3612	7.4716	5.6864	7.4192	6.6832	7.1168	7.7468	7.2156	6.9124	7.894	8.3716	6.8556	5.7328	7.028	7.2904	9.8072	8.4324	8.796	7.594	6.878	7.0332	6.24	5.696	6.9032	5.6592	6.7168	6.472	7.6368	6.9928	7.1168	8.3416	7.26	6.9188	7.588	6.6844	7.1352
		Rep 2	5.6324	6.7152	5.7196	4.7796	6.0716	4.826	5.6796	6.0572	5.1496	5.0384	4.9008	4.722	3.9356	5.156	5.6196	5.3888	4.824	4.7284	4.746	5.5892	5.7372	5.7792	5.6152	5.934	5.38	4.8324	5.166	5.9872	4.1392	6.3004	5.8416	6.4792	7.0868	5.2976	6.5288	6.6056	6.0508	5.274	6.9272	6.388	6.8224	7.2652	6.6464	6.3148	6.86	6.1672	6.3752
		Rep 3	6.8668	8.6976	9.5292	7.8336	7.788	7.4252	8.4348	9.4668	9.4504	9.0172	7.6556	9.3852	8.8356	7.8648	9.2704	6.634	7.5528	8.11	8.7328	10.0472	8.9076	8.2912	9.0268	8.7364	9.3912	9.988	7.932	8.3904	9.8552	10.4568	9.3764	9.0316	8.8064	8.2804	8.634	7.2024	7.3308	9.0052	8.3848	8.1736	7.4296	9.6076	9.41	8.8676	8.8188	7.708	8.2016
		Rep 4	6.0896	5.9544	7.1588	8.2128	6.5392	6.7244	6.5268	5.8252	5.6472	5.88	6.9412	6.3296	6.8172	6.0768	6.3744	6.9344	7.2036	6.9488	6.5124	6.6352	6.4984	5.9644	4.3568	6.6548	6.2228	5.9796	5.766	5.8472	6.6464	6.9868	6.1408	5.9112	7.0124	5.2628	5.2484	5.234	5.8036	6.5536	6.2048	5.9568	6.4148	6.034	5.176	6.5076	6.3124	6.176	5.486
		Rep 5	10.6708	10.0196	9.8816	8.7612	9.4096	8.8532	9.3076	9.0756	9.3736	8.5444	8.7892	9.608	8.7488	9.4392	9.4212	8.7104	8.8848	8.864	9.0848	8.7312	9.5284	10.2256	9.1496	8.7844	8.8276	10.1496	8.9828	8.718	9.2952	9.7052	9.2784	8.8312	8.9832	7.9712	9.1772	8.4948	9.5724	8.5032	9.5924	9.8148	9.468	10.2292	10.3672	9.3468	9.1504	8.9724	9.4484
		Time (h)	0	1	2	3	4	5	6	7	8	9	10	11	12	13	14	15	16	17	18	19	20	21	22	23	24	25	26	27	28	29	30	31	32	33	34	35	36	37	38	39	40	41	42	43	44	45	46
	Normalized GFP	Rep 1	0.979588	1	0.910772	0.884003	0.861084	0.890885	0.89036	0.879804	0.88966	0.875605	0.850236	0.861958	0.842655	0.846212	0.836065	0.819852	0.826908	0.831107	0.810229	0.8272	0.822126	0.824051	0.80778	0.795649	0.799673	0.797574	0.787426	0.797282	0.779203	0.777979	0.792325	0.792384	0.786727	0.786202	0.794366	0.786785	0.805855	0.771797	0.762757	0.749985	0.763341	0.7592	0.761416	0.770747	0.760308	0.754884	0.799207
		Rep 2	1	0.874011	0.850659	0.832329	0.827684	0.852982	0.828123	0.864721	0.848964	0.862084	0.890898	0.870182	0.863402	0.866604	0.86221	0.848211	0.860264	0.85656	0.842122	0.844633	0.839422	0.840364	0.872316	0.852668	0.865348	0.839297	0.830132	0.833082	0.842059	0.826993	0.820527	0.814375	0.815631	0.82737	0.825612	0.76811	0.762775	0.802762	0.794664	0.805587	0.812429	0.812304	0.826428	0.822473	0.808286	0.767357	0.795229
		Rep 3	0.957209	0.999087	0.953671	0.994808	1	0.955041	0.929252	0.931934	0.942546	0.92988	0.880812	0.873338	0.86187	0.893707	0.87659	0.873167	0.850802	0.852114	0.862213	0.858561	0.850859	0.832544	0.847036	0.84424	0.851429	0.826268	0.835625	0.809095	0.814914	0.818509	0.809437	0.812689	0.82661	0.822046	0.812518	0.816398	0.833343	0.840874	0.829862	0.8423	0.86769	0.879215	0.841901	0.844982	0.857648	0.841844	0.835226
		Rep 4	1	0.970918	0.939665	0.907626	0.896645	0.911367	0.894292	0.92627	0.909195	0.885664	0.921504	0.879389	0.893749	0.927839	0.896947	0.871304	0.900084	0.882165	0.887293	0.894292	0.89381	0.855074	0.876131	0.871787	0.875287	0.853807	0.847291	0.884639	0.901291	0.855979	0.850428	0.868891	0.82913	0.884639	0.883432	0.881622	0.900145	0.876312	0.896464	0.906963	0.886811	0.9136	0.927235	0.879389	0.928201	0.896042	0.916194
		Rep 5	1	0.840801	0.85725	0.888601	0.887455	0.849973	0.899467	0.828939	0.806759	0.841998	0.858097	0.795743	0.840104	0.820665	0.858795	0.844241	0.802073	0.809301	0.804516	0.82236	0.83487	0.800279	0.814534	0.804067	0.829637	0.797787	0.771719	0.79036	0.782236	0.783033	0.766685	0.80302	0.794398	0.765539	0.810995	0.761451	0.802073	0.794049	0.772816	0.785426	0.745352	0.756716	0.738972	0.743408	0.734287	0.729801	0.713104
[truncated: 2 more columns]

## Sheet: Fig. 3E
		Time (h)	0	1	2	3	4	5	6	7	8	9	10	11	12	13	14	15	16	17	18	19	20	21	22	23	24	25	26	27	28	29	30	31	32	33	34	35	36	37	38	39	40	41	42	43	44	45	46
	Area (µm2)	Rep 1	7.9964	8.2944	10.2916	10.3564	11.2632	10.1248	8.334	11.4712	9.4336	13.104	12.9492	10.3248	13.9772	13.9884	13.0748	15.278	16.1	14.8216	15.6904	15.62	15.5884	16.2168	15.0696	16.0864	15.342	19.5096	18.34	17.7136	20.502	19.9284	19.7328	17.9904	18.8324	20.8924	22.1724	23.71	24.1056	23.4548	23.4952	23.3012	22.0512	24.686	23.926	25.1448	24.0972	23.8404	26.4384
		Rep 2	9.9732	11.3168	11.5024	11.2132	11.8952	10.9064	13.4944	13.5904	14.4992	12.2296	14.1004	13.21	12.5676	15.2644	13.4672	15.3852	16.6168	16.1368	17.5608	17.196	18.5912	21.8004	21.3424	21.848	22.714	25.4948	28.5496	31.1724	33.2988	34.902	37.076	38.9052	42.2136	48.716	48.244	56.1648	52.7192	51.1632	55.6608	55.3408	53.9816	50.9608	54.5648	51.5536	51.9728	53.5256	53.3896
		Rep 3	9.0048	8.724	7.4576	9.0124	11.502	14.8184	15.5956	16.0588	18.3184	15.3052	16.1788	15.4968	15.8232	18.714	18.11	16.2124	18.3732	20.4172	21.2048	22.938	22.0752	22.158	25.638	27.25	26.8164	30.2536	30.5088	32.394	33.0628	36.6772	36.6688	36.7228	37.4716	38.1672	37.744	39.8984	39.8864	39.2584	41.6756	41.0496	40.6396	42.9628	40.2316	44.89	43.0552	46.0056	46.7392
		Rep 4	5.5144	5.944	5.4156	5.2944	5.2988	5.8004	5.6532	5.938	4.4252	5.3932	4.9164	4.814	6.2156	4.9076	6.5248	7.0088	7.3112	8.5556	8.5116	11.6516	13.8976	13.0208	15.4736	16.5612	16.4352	17.5364	17.1916	17.3164	20.8172	20.3708	22.1804	20.1092	20.5236	24.586	28.8392	25.6468	25.6484	27.5028	27.5248	27.9472	26.7552	27.8788	28.1848	30.3332	31.13	35.7168	34.9512
		Rep 5	9.26	8.2108	8.9616	9.1648	12.594	15.712	17.104	18.0364	19.7116	16.846	17.8416	19.0052	17.1096	18.6772	18.8824	19.8308	17.2924	19.1916	17.2308	21.214	22.0316	23.1648	27.2076	31.6404	30.5236	33.5472	31.9472	33.2212	34.4312	36.2952	37.5004	40.4564	37.2924	39.8576	40.468	41.578	37.772	43.1056	42.4772	45.1396	46.2832	46.2052	50.288	49.3524	49.864	48.7224	48.5104
		Time (h)	0	1	2	3	4	5	6	7	8	9	10	11	12	13	14	15	16	17	18	19	20	21	22	23	24	25	26	27	28	29	30	31	32	33	34	35	36	37	38	39	40	41	42	43	44	45	46
	Normalized GFP	Rep 1	0.937441	0.956546	0.885672	0.888358	0.83403	0.831173	0.8342	0.83339	0.822047	0.87194	0.972623	0.999062	1	0.930064	0.957313	0.938721	0.911898	0.84081	0.697484	0.738337	0.729765	0.715437	0.762687	0.666866	0.584989	0.580512	0.581493	0.619232	0.596716	0.594755	0.604136	0.603198	0.589723	0.607889	0.586055	0.589083	0.562985	0.569339	0.575011	0.551343	0.53565	0.514158	0.561194	0.521109	0.53548	0.535394	0.521365
		Rep 2	1	0.926995	0.884014	0.858904	0.813153	0.842105	0.853498	0.790948	0.859619	0.815745	0.779019	0.856983	0.840273	0.773032	0.796935	0.797784	0.815075	0.751988	0.748727	0.760567	0.793405	0.832097	0.790903	0.749173	0.715932	0.716826	0.678983	0.678804	0.626217	0.620588	0.61058	0.594853	0.574926	0.554821	0.538915	0.511259	0.52855	0.508221	0.538602	0.543115	0.562908	0.549147	0.546421	0.548342	0.555982	0.51662	0.537217
		Rep 3	0.951645	1	0.906146	0.811303	0.808668	0.817563	0.824152	0.812621	0.808485	0.836634	0.863648	0.886416	0.858084	0.86072	0.863868	0.91731	0.951755	0.947582	0.788682	0.842966	0.837659	0.798785	0.747465	0.759179	0.756726	0.732018	0.694132	0.722977	0.688605	0.688532	0.660566	0.639079	0.646327	0.630111	0.604085	0.588125	0.554889	0.515539	0.492917	0.481753	0.492148	0.505582	0.503056	0.531754	0.55584	0.567664	0.573557
		Rep 4	1	0.916533	0.86207	0.803688	0.844279	0.878566	0.863536	0.874169	0.889063	0.864388	0.752497	0.790225	0.743397	0.730309	0.714461	0.649228	0.645343	0.63321	0.587983	0.608159	0.528953	0.569783	0.557718	0.521386	0.55114	0.527726	0.523022	0.552878	0.555298	0.527419	0.547323	0.527692	0.538802	0.53219	0.546164	0.599809	0.590164	0.593743	0.613646	0.612488	0.658328	0.641117	0.6267	0.587028	0.626155	0.554105	0.584506
		Rep 5	0.965379	0.980989	0.925657	0.857071	0.877743	0.876546	0.803478	0.834699	0.865185	0.823107	0.826816	0.843161	0.886708	0.877396	0.948145	0.951198	1	0.969397	0.853864	0.917697	0.845672	0.865456	0.805526	0.803825	0.811978	0.791267	0.735471	0.750927	0.724614	0.70881	0.692543	0.676005	0.657535	0.654366	0.613138	0.595402	0.561708	0.532612	0.507535	0.506066	0.497566	0.526662	0.52075	0.550618	0.570672	0.584544	0.60425
[truncated: 2 more columns]

## Sheet: Fig. 3F-G
		Nuclear Area (µm2)		nlsGFP intensity normalized to Day 0
	Sample	0 Days	2 Days	2 Days
	Control Diet	9.7952	10.7232	0.826736
	Control Diet	12.096	11.736	0.708789
	Control Diet	12.712	12.406	0.951122
	Control Diet	9.1404	8.7956	0.709387
	Control Diet	12.5128	13.706	0.742307
	Control Diet	12.486	12.9516	0.809784
	Control Diet	9.6804	9.592	0.726328
	Control Diet	9.6468	10.0236	0.78209
	Control Diet	6.9568	7.0812	0.809482
	Control Diet	6.7896	6.4716	0.770536
	Control Diet	6.3736	7.0188	0.861192
	Control Diet	12.6164	11.7772	0.898267
	Control Diet	11.3568	11.9328	0.723243
	Control Diet	9.5748	8.9976	0.688182
	Control Diet	6.0876	6.502	0.790602
	Control Diet	8.1504	8.366	0.744777
	Control Diet	12.0248	10.4684	0.780464
	Control Diet	7.9576	8.2328	0.970326
	Control Diet	10.902	12.5384	0.684873
	Control Diet	7.608	6.6092	0.847295
	Control Diet	8.264	8.6064	0.841432
	Control Diet	7.5944	6.9864	0.685379
	Control Diet	9.8304	9.5688	0.807853
	Control Diet	14.828	14.8584	1.04525
	Control Diet	8.632	8.6296	0.909352
	Control Diet	11.6008	11.9232	1.00969
	Control Diet	8.4824	7.9572	0.650177
	Control Diet	17.6672	18.538	1.20748
	Control Diet	8.8528	7.8384	1.31514
	Control Diet	7.5272	6.6352	0.746872
	Control Diet	13.2031	10.4173	0.994348
	Control Diet	7.7502	8.3444	1.31874
	Control Diet	4.9974	4.1788	1.00711
	Control Diet	7.2419	6.7402	0.931749
	Control Diet	5.9018	5.9876	1.008
	Control Diet	13.0183	14.167	1.00537
	Control Diet	12.2987	11.1632	0.936779
	Control Diet	9.8231	11.4405	0.936546
	Control Diet	10.7209	13.1569	1.13881
	Control Diet	9.46	9.7109	0.98815
	Control Diet	5.2945	5.3209	1.13443
	Control Diet	8.5952	8.5688	1.15304
	Control Diet	10.9454	9.5129	1.23986
	Control Diet	7.3409	7.0835	1.18865
	Control Diet	7.6116	6.0008	1.19878
	Control Diet	10.3975	9.1696	1.24939
	Control Diet	10.3975	8.7339	1.14382
	Control Diet	8.0275	6.5289	1.18591
	Control Diet	6.954	6.4436	0.766268
	Control Diet	5.6324	5.5496	0.775016
	Control Diet	6.8668	8.2824	0.877511
	Control Diet	6.0896	6.788	0.892543
	Control Diet	10.6708	9.5652	0.734985
	SDS 0.2 %	60.7928	71.6984	0.705582
	SDS 0.2 %	12.8544	34.0184	0.946263
	SDS 0.2 %	24.2384	75.7416	0.913783
	SDS 0.2 %	10.2952	28.9016	0.690771
	SDS 0.2 %	17.4012	43.8016	0.775399
	SDS 0.2 %	14.8576	47.2048	0.674284
	SDS 0.2 %	50.5348	80.028	0.761302
	SDS 0.2 %	12.1116	41.9212	0.850777
	SDS 0.2 %	10.5608	38.1056	0.890965
	SDS 0.2 %	47.2448	46.874	0.979796
	SDS 0.2 %	12.094	12.3264	0.870206
	SDS 0.2 %	50.1828	49.7228	0.75824
	SDS 0.2 %	21.1524	33.7384	0.972912
	SDS 0.2 %	49.558	80.2256	0.786875
	SDS 0.2 %	24.0728	28.3468	0.908746
	SDS 0.2 %	40.1108	73.9392	0.735352
	SDS 0.2 %	17.9856	35.6024	0.962822
	SDS 0.2 %	7.5188	17.1096	0.635112
	SDS 0.2 %	6.0464	6.3172	0.889381
	SDS 0.2 %	8.6984	8.19	0.80245
	SDS 0.2 %	9.9524	38.7468	0.789201
	SDS 0.2 %	8.9244	17.6712	0.576982
	SDS 0.2 %	14.11	23.6976	0.529155
	SDS 0.2 %	8.8128	14.0656	0.949372
	SDS 0.2 %	16.7892	35.6928	0.603889
	SDS 0.2 %	7.184	13.0972	0.815972
	SDS 0.2 %	6.7912	34.8828	0.455778
	SDS 0.2 %	7.2044	5.1748	0.967848
	SDS 0.2 %	5.5328	5.9788	0.784227
	SDS 0.2 %	28.7436	23.7536	0.886596
	SDS 0.2 %	31.264	42.8676	0.881436
	SDS 0.2 %	8.0272	34.7604	0.714368
	SDS 0.2 %	8.1284	13.5348	0.700085
	SDS 0.2 %	9.032	9.1224	0.760605
	SDS 0.2 %	13.4924	24.7192	0.519119
	SDS 0.2 %	17.642	32.5816	0.85847
	SDS 0.2 %	5.902	30.498	0.458636
	SDS 0.2 %	13.57	17.6824	0.941904
	SDS 0.2 %	40.436	42.7176	0.807491
	SDS 0.2 %	12.0932	33.73	0.908442
	SDS 0.2 %	12.664	33.1912	0.64727
	SDS 0.2 %	8.3484	17.1968	0.739406
	SDS 0.2 %	12.612	23.6096	0.740965
	SDS 0.2 %	20.5948	35.75	0.851032
	SDS 0.2 %	25.616	64.2144	0.532661
	SDS 0.2 %	23.8636	77.0832	0.425172
	SDS 0.2 %	8.7736	18.328	0.775813
	SDS 0.2 %	9.498	36.4364	0.601745
	SDS 0.2 %	17.0128	43.6356	0.318768
	SDS 0.2 %	5.9116	43.0304	0.734884
	SDS 0.2 %	22.7408	64.8288	0.467544
	SDS 0.2 %	5.7092	33.5224	0.75919
	SDS 0.2 %	6.1452	21.8824	0.664153
	SDS 0.2 %	7.6104	18.7536	0.754197
	SDS 0.2 %	8.822	8.7456	0.644229
	SDS 0.2 %	14.1816	41.6572	0.748009
	SDS 0.2 %	24.9784	41.9068	0.315936
	SDS 0.2 %	7.3144	14.7808	0.978287
	SDS 0.2 %	26.704	53.2384	0.929863
	SDS 0.2 %	9.7456	42.5056	0.604853
	SDS 0.2 %	8.3752	11.9524	0.7756
	SDS 0.2 %	6.352	27.3916	0.694208
	SDS 0.2 %	6.4692	8.0184	1.08342
	SDS 0.2 %	8.4616	17.3284	0.514916
	SDS 0.2 %	7.9964	25.8228	0.555975
	SDS 0.2 %	26.6564	58.4584	0.522566
	SDS 0.2 %	9.9732	49.248	0.525556
	SDS 0.2 %	9.0048	46.8744	0.627433
	SDS 0.2 %	5.5144	38.9672	0.576531
