# Supplementary material for: An improved organ explant culture method reveals stem cell lineage dynamics in the adult Drosophila intestine
Source: eLife. 2022 Aug 25;11:e76010. doi: 10.7554/eLife.76010 (PMC9578704; doi:10.7554/eLife.76010)
Supplement: Figure 4—source data 1. [file elife-76010-fig4-data1.xlsx]

## Sheet: Fig. 4D
			Total esg+ cells tracked	Proliferating cells
	Control	Rep 1	96	0
		Rep 2	119	0
		Rep 3	73	0
		Rep 4	62	0
	RasG12V	Rep 1	32	5
		Rep 2	43	7
		Rep 3	32	5
		Rep 4	40	3
		Rep 5	26	4
		Rep 6	25	8
		Rep 7	38	10
		Rep 8	22	6
		Rep 9	44	9
		Rep 10	28	8
	stg + CycE	Rep 1	35	7
		Rep 2	33	11
		Rep 3	26	9
		Rep 4	48	14
		Rep 5	43	12
		Rep 6	34	8
		Rep 7	43	8

## Sheet: Fig. 4F
	Cell cycle duration (h)
	RasG12V	stg + CycE
	8	8
	7	7
	7	11
	8	9
	10	10
	5	6
	7	22
	12	19
	7	5
	7	6
	8	14
	7	8
	4	8
	6	6
	11	16
	13	7
	5	12
	9	5
	8	7
	15	7
	8	6
	11	8
	6
	5
	4
	10
