# Supplementary material for: An improved organ explant culture method reveals stem cell lineage dynamics in the adult Drosophila intestine
Source: eLife. 2022 Aug 25;11:e76010. doi: 10.7554/eLife.76010 (PMC9578704; doi:10.7554/eLife.76010)
Supplement: Figure 6—source data 1. [file elife-76010-fig6-data1.xlsx]

## Sheet: Fig. 6-E-F
	Symmetric pair
	Nuclear area (µm2)
	Time-point (h)	15	16	17	18	19	20	21	22	23	24	25	26	27	28	29	30	31	32	33	34	35	36	37	38	39	40	41	42	43	44	45	46
	Cell #0	12.5072	14.1872	9.134	7.592	9.9656	15.8728	18.7192	25.012	24.8736	24.788	25.8672	23.54	27.3056	24.5176	28.9496	28.32	64.0488	Divided
	Cell #1																	Daughter of #0	14.74	14.512	18.5992	20.7	19.0792	30.2584	31.7184	36.4672	27.2408	Divided
	Cell #2																	Daughter of #0	16.7592	13.104	20.3448	22.3136	21.932	31.532	31.9136	33.948	32.8684	25.1704	Divided
	Cell #3																											Daughter of #2	14.2324	16.3204	17.7184	23.0468	19.212
	Cell #4																										Daughter of #1	12.708	16.0692	15.5236	19.2976	17.08	18.8416
	Cell #5																										Daughter of #1	11.7232	16.0124	18.4004	19.7168	18.7432	15.1448
	Cell #6																											Daughter of #2	15.2808	18.3272	15.6808	15.3808	21.9832
	Normalized GFP Fluorescence
	Time-point (h)	15	16	17	18	19	20	21	22	23	24	25	26	27	28	29	30	31	32	33	34	35	36	37	38	39	40	41	42	43	44	45	46
	Cell #0	0.9928	1.0214	1.0438	1.0796	1.0737	1.0629	1.0764	1.0773	1.0955	1.0894	1.0894	1.0947	1.1229	1.1875	1.1954	1.1917	1.1448	Divided
	Cell #1																	Daughter of #0	1.2021	1.2097	1.2213	1.146	1.1948	1.2202	1.2675	1.3057	1.3227	Divided
	Cell #2																	Daughter of #0	1.165	1.2442	1.2393	1.2733	1.333	1.2786	1.3198	1.3622	1.2635	1.3844	Divided
	Cell #3																											Daughter of #2	1.336	1.2719	1.277	1.2103	1.2227
	Cell #4																										Daughter of #1	1.3555	1.2645	1.3046	1.3629	1.3926	1.3924
	Cell #5																										Daughter of #1	1.2666	1.2207	1.2211	1.207	1.2082	1.2612
	Cell #6																											Daughter of #2	1.2928	1.2943	1.2924	1.2976	1.3557

## Sheet: Fig. 6G-H
	Asymmetric pair
	Nuclear area (µm2)
	Time-point (h)	0	1	2	3	4	5	6	7	8	9	10	11	12	13	14	15	16	17	18	19	20	21	22	23	24	25	26	27	28	29	30	31	32	33	34	35	36	37	38	39	40	41	42	43	44	45	46	47
	Cell #0	11.97	14.2904	11.9124	10.5144	9.654	8.7092	9.3616	9.3016	12	10.0132	12.8312	15.254	15.8216	14.2532	14.3544	12.9672	16.0276	17.652	20.5532	22.8496	22.8216	26.678	25.0124	24.1012	25.86	27.714	27.8272	28.7288	30.3604	Divided
	Cell #1																													Daughter of #0	11.5516	14.9996	18.386	24.8588	28.33	27.3228	26.2652	29.7044	25.2848	23.2468	23.3408	27.3852	30.1256	Divided
	Cell #2																																										Daughter of #1	18.0276	16.206	15.2808	14.2892	17.974	21.6396
	Cell #3																													Daughter of #0	15.8164	17.2044	19.88	23.322	21.528	24.5852	22.812	30.1592	26.0104	26.972	32.4012	30.652	31.5276	33.464	35.5056	39.4524	39.0952	39.2128	41.7628
	Cell #4																																										Daughter of #1	25.2432	17.4228	21.6324	21.5576	21.8344	23.462
	Normalized GFP Fluorescence
	Time-point (h)	0	1	2	3	4	5	6	7	8	9	10	11	12	13	14	15	16	17	18	19	20	21	22	23	24	25	26	27	28	29	30	31	32	33	34	35	36	37	38	39	40	41	42	43	44	45	46	47
	Cell #0	1.2026	1.1388	1.1703	1.1941	1.2592	1.2587	1.2002	1.2169	1.2046	1.1925	1.2453	1.2232	1.2296	1.2845	1.2711	1.2857	1.2802	1.2748	1.2622	1.2663	1.2341	1.2659	1.2801	1.239	1.2857	1.2524	1.2522	1.3281	1.3342	Divided
	Cell #1																													Daughter of #0	1.3431	1.3255	1.3068	1.279	1.3246	1.4472	1.6219	1.6005	1.8542	1.713	1.7522	1.6701	1.6409	Divided
	Cell #2																																										Daughter of #1	1.4579	1.6938	1.5903	1.5331	1.5115	1.4594
	Cell #3																													Daughter of #0	1.2924	1.2597	1.282	1.2409	1.2783	1.4386	1.3834	1.2664	1.4237	1.3565	1.253	1.2305	1.2421	1.1786	1.1966	1.1132	1.1082	1.1115	1.0826
	Cell #4																																										Daughter of #1	1.4574	1.5781	1.4326	1.4294	1.4138	1.4909
