# Supplementary material for: An improved organ explant culture method reveals stem cell lineage dynamics in the adult Drosophila intestine
Source: eLife. 2022 Aug 25;11:e76010. doi: 10.7554/eLife.76010 (PMC9578704; doi:10.7554/eLife.76010)
Supplement: Figure 7—figure supplement 1—source data 1. [file elife-76010-fig7-figsupp1-data1.xlsx]

## Sheet: Fig. 7 - figure supplement 1A
	Cell motility (µm / h)
	RasG12V		Stg + CycE
	Dividing	Non-dividing	Dividing	Non-Dividing
	3.4598	3.07145	2.741	3.94289
	1.1612	0.355049	0.5906	4.72459
	2.3366	3.72619	3.4544	1.42184
	3.4345	3.33347	0.4078	0.324363
	0.6539	1.69947	3.8446	1.25616
	1.4018	0.47033	3.0133	3.67835
	2.0829	2.88465	0.5153	3.08059
	3.5812	3.14349	1.8812	3.05549
	6.018	6.00903	2.2258	2.3004
	4.7813	2.23171	0.5721	0.727309
	1.6451	1.15463	0.8644	0.927122
	3.1294	3.08445	0.6678	1.37275
	3.2915	2.23859	2.5791	3.25562
	2.2688	3.35778	3.1091	3.03134
	0.8371	0.571118	3.1404	1.60964
	3.6767	4.04033	3.9315	0.685986
	0.9803	1.5509	1.1976	3.21339
	3.0028	3.5638	3.3899	3.01304
	3.4518	3.00698	5.1643	0.74507
	3.1222	0.925737	3.0515	3.21495
	0.9031	4.86171	3.1765	1.42818
	5.0494	2.53375	0.7685	1.05821
	3.8996	3.40895	1.1587	3.73745
	3.6792	5.7951	1.6541	3.67453
	6.5379	3.30339	3.5552	3.87974
	3.2966	3.00274	3.7498	4.48876
	2.9278	1.77086	1.5717	3.33939
	2.2005	0.718506	0.1485	1.08337
	0.3166	3.22876	3.043	3.58959
	4.6926	2.1912	0.6141	1.41276
	3.0307	3.91872	1.5466	4.02684
	1.9167	1.25445	3.2898	3.84367
	3.6718	3.02349	6.5861	2.91145
	3.3518	4.54775	1.1291	3.76718
	1.5451	0.394332	1.4065	4.1723
	3.067	3.64595	4.5097	2.18299
	0.3199	0.657831	6.3025	3.21066
	5.6812	0.612089	3.3949	1.578
	1.8609	4.68977	1.2368	0.530984
	5.173	1.71342	1.4744
	0.3045	3.36192
		3.77629

## Sheet: Fig. 7 - figure supplement 1B
		Time (h)	1	2	3	4	5
	Asymmetric Dividing cells motility (µm / h)	Cell 1	3.45981	4.78129	3.4518	2.2005	3.06697
		Cell 2	1.1612	1.64507	3.12221	0.316628	0.319919
		Cell 3	2.33663	3.12938	0.90305
		Cell 4	3.4345	3.29151	5.04945	4.69258	5.68124
		Cell 5	0.653933	2.26878	3.89959	3.0307
		Cell 6	1.40179	0.837051	3.67918	1.91668	1.86089
		Cell 7	2.0829	3.67669	6.5379	3.67175	5.17303
		Cell 8	3.58119	0.980324	3.29662	3.35181
		Cell 9	6.01804	3.00282	2.92779	1.5451	0.304451
		Cell 10	2.74096	2.22581	1.19756	3.55521	6.58607
		Cell 11	0.590644	0.572121	3.38985	3.7498	1.12905
		Cell 12	3.45438	0.864429	5.1643	1.57172	1.40648
		Cell 13	0.407777	0.667751	3.05155	0.148458	4.50967
		Cell 14	3.84459	2.57914	3.17652	3.04304	6.30246
		Cell 15	3.01331	3.10914	0.768539	0.614095	3.3949
		Cell 16	0.51533	3.1404	1.15865	1.5466	1.23684
		Cell 17	1.88121	3.93152	1.65415	3.28985	1.47437

## Sheet: Fig. 7 - figure supplement 1C
		Time (h)	1	2	3	4	5
	Asymmetric Non-dividing cells motility (µm / h)	Cell 1	3.07145	2.23171	3.5638	1.77086	3.64595
		Cell 2	0.355049	1.15463	3.00698	0.718506	0.657831
		Cell 3	3.72619	3.08445	0.925737	3.22876	0.612089
		Cell 4	3.33347	2.23859	4.86171	2.1912
		Cell 5	1.69947	3.35778	2.53375	3.91872	4.68977
		Cell 6	0.47033	0.571118	3.40895	1.25445	1.71342
		Cell 7	2.88465	4.04033	5.7951	3.02349
		Cell 8	3.14349	1.5509	3.30339	4.54775	3.36192
		Cell 9	6.00903		3.00274	0.394332	3.77629
		Cell 10	3.94289	2.3004	3.21339	3.87974
		Cell 11	4.72459	0.727309	3.01304	4.48876	2.91145
		Cell 12	1.42183	0.927122	0.74507	3.33939	3.76718
		Cell 13	0.324363	1.37275	3.21495	1.08337	4.1723
		Cell 14	1.25616	3.25562	1.42818	3.58959	2.18299
		Cell 15	3.67835	3.03134	1.05821	1.41276	3.21066
		Cell 16	3.08059	1.60964	3.73745	4.02684	1.578
		Cell 17	3.05549	0.685986	3.67453	3.84367	0.530984

## Sheet: Fig. 7 - figure supplement 1D
		Time (h)	1	2	3	4	5
	Symmetric cells motility (µm / h)	Cell 1	5.8771	6.42737	3.07093	3.27785	3.71775
		Cell 2	3.4099	6.09201	3.06455	1.07878	3.57158
		Cell 3	3.04736	4.05288	1.54275	6.11515	3.00791
		Cell 4	2.17331	2.66359	3.34566	6.1616	3.43319
		Cell 5	3.49629	4.01573	2.90157	2.24583	3.28104
		Cell 6	3.07485	2.19588	1.48513	1.1392	4.882
		Cell 7		3.19344		3.96757	6.33454
		Cell 8		3.96584	0.422363	3.72215
		Cell 9	1.27237	4.24167	1.46688
		Cell 10	6.45441	4.76097			3.95819
		Cell 11	2.01706	2.90084	3.11109	2.13846	3.03441
		Cell 12	0.885481	0.470253	3.20928	3.18723	1.38996
		Cell 13	0.696433	0.909911	0.76064	2.01826	2.33236
		Cell 14	4.05706	4.19374	0.930249	3.1932	4.14916
		Cell 15	0.865134	1.46246	1.41408	3.24758
		Cell 16	3.88589	1.09336	3.07966	1.78996	0.833602

## Sheet: Fig. 7 - figure supplement 1E
	Cell motility (µm / h)
	Asymmetric Dividing	Asymmetric Differentiating	Symmetric
	0.148458	0.324363	0.422363
	0.304451	0.355049	0.470253
	0.316628	0.394332	0.696433
	0.319919	0.47033	0.76064
	0.407777	0.530984	0.833602
	0.51533	0.571118	0.865134
	0.572121	0.612089	0.885481
	0.590644	0.657831	0.909911
	0.614095	0.685986	0.930249
	0.653933	0.718506	1.07878
	0.667751	0.727309	1.09335
	0.768539	0.74507	1.1392
	0.837051	0.925737	1.27237
	0.864429	0.927122	1.38996
	0.90305	1.05821	1.41408
	0.980324	1.08337	1.46246
	1.12905	1.15463	1.46688
	1.15865	1.25445	1.48513
	1.1612	1.25616	1.54275
	1.19756	1.37275	1.78996
	1.23684	1.41276	2.01706
	1.40179	1.42184	2.01826
	1.40648	1.42818	2.13846
	1.47437	1.5509	2.17331
	1.5451	1.578	2.19588
	1.5466	1.60964	2.24583
	1.57172	1.69947	2.33236
	1.64507	1.71342	2.66359
	1.65415	1.77086	2.90084
	1.86089	2.18299	2.90157
	1.88121	2.1912	3.00791
	1.91668	2.23171	3.03441
	2.0829	2.23859	3.04736
	2.2005	2.3004	3.06455
	2.22581	2.53375	3.07093
	2.26878	2.88465	3.07485
	2.33663	2.91145	3.07966
	2.57914	3.00274	3.11109
	2.74096	3.00698	3.18723
	2.92779	3.01304	3.1932
	3.00282	3.02349	3.19344
	3.01331	3.03134	3.20928
	3.0307	3.05549	3.24758
	3.04304	3.07145	3.27785
	3.05155	3.08059	3.28104
	3.06697	3.08445	3.34566
	3.10914	3.14349	3.40989
	3.12221	3.21066	3.43319
	3.12938	3.21339	3.49629
	3.1404	3.21495	3.57158
	3.17652	3.22876	3.71775
	3.28985	3.25562	3.72215
	3.29151	3.30339	3.88589
	3.29662	3.33347	3.95819
	3.35181	3.33939	3.96584
	3.38986	3.35778	3.96757
	3.3949	3.36192	4.01573
	3.4345	3.40895	4.05288
	3.45179	3.5638	4.05706
	3.45438	3.58959	4.14916
	3.45981	3.64595	4.19374
	3.55521	3.67453	4.24167
	3.58119	3.67835	4.76097
	3.67175	3.72619	4.882
	3.67669	3.73745	5.8771
	3.67918	3.76718	6.09201
	3.74981	3.77629	6.11515
	3.84459	3.84367	6.1616
	3.89959	3.87974	6.33454
	3.93152	3.91872	6.42737
	4.50967	3.94289	6.45441
	4.69258	4.02684
	4.78129	4.04033
	5.04944	4.1723
	5.1643	4.48876
	5.17303	4.54775
	5.68124	4.68977
	6.01804	4.72459
	6.30246	4.86171
	6.5379	5.7951
	6.58607	6.00903
		6.8409

## Sheet: Fig. 7 - figure supplement 1F
	Sister Relative Movement (μm)
	Symmetric	Asymmetric
	5.2915	1.7916
	2.69344	4.38304
	1.19108	3.34388
	1.27484	3.53373
	2.74646	1.44443
	1.26195	1.75613
	5.19281	1.51077
	1.43182	2.49957
	1.94126	0.829361
	0.582219	0.854457
	1.73666	0.977749
	4.10593	1.38819
	1.12179	4.4602
	1.82269	0.631619
	1.57451	0.843856
	2.76063	0.740293
	3.32095	1.48117
	1.33424	2.5737
	4.55619	2.50227
	2.47245	0.898533
	7.40623	1.27254
	2.71029	1.27209
	3.79077	2.55891
	6.24553	1.93694
	7.06888	2.12706
	1.00511	1.57631
	8.49111	1.31528
	3.74797	0.639519
	1.38836	0.671142
	3.35802	1.50811
	0.572837	4.36385
	2.02825	3.72493
	1.17688	0.580989
	0.685576	0.895374
	4.14941	2.17063
	3.87925	1.9363
	1.46445	1.72021
	1.32157	2.18399
	2.57102	1.79572
	0.263203	0.066808
	2.09137	1.93185
	0.867472	0.304371
	1.07419	1.20018
	0.904556	3.01235
		1.34063
		1.98909
		0.709551
		1.25015
		1.14202
		0.4108
		0.689967
		4.29285
		5.14858
		5.29694
		1.06966
		1.46526
		1.38145
		3.88817
		2.57604
		0.400665
		4.12795
		2.56643
		4.21764
		1.51673
		0.084359
		0.813092
		1.13837
		1.16
		5.40184
		1.82823
		3.6581
		0.805459
		1.75329
		1.6161
		3.55193
		1.84549
		1.24509
		0.431219
		1.00134
		0.446266
		0.24967
		0.954794
		1.66318
		1.41028
		1.15923
		2.14674
		1.20755
		1.3685
		3.206
		2.17831
		2.02437
		1.36538
