# Supplementary material for: An improved organ explant culture method reveals stem cell lineage dynamics in the adult Drosophila intestine
Source: eLife. 2022 Aug 25;11:e76010. doi: 10.7554/eLife.76010 (PMC9578704; doi:10.7554/eLife.76010)
Supplement: Figure 7—source data 1. [file elife-76010-fig7-data1.xlsx]

## Sheet: Fig. 7A
	Sister cells angle (Degrees)
	Symmetric	Asymmetric
	6.02133	34.1582
	1.4114	3.44577
	3.78883	9.548
	7.60563	21.1127
	2.5629	2.47081
	4.6455	2.89173
	1.1758	3.1006
	0.858267	6.74483
		3.11677
		2.7117
		20.2872
		2.8339
		2.77607
		2.5516
		7.96553

## Sheet: Fig. 7D
			Time (h)	0	1	2	3	4	5
	Sister cells distance (µm)	Symmetric pairs	Pair 1	9.03999	14.2397	16.2552	15.0645	15.4716	17.9922
			Pair 2	10.6955	15.4457	14.014	14.9905	14.4206	15.1881
			Pair 3	6.7599	6.40594	7.62695	8.94278	11.4817	9.89765
			Pair 4	8.14329	12.5207	10.1891	17.7603	19.845	20.1951
			Pair 5	8.33191	12.2358	13.0187	21.4913	22.8635
			Pair 6	8.52844	7.14087	9.66132	9.09413	11.515	11.1125
			Pair 7	8.48666	12.5006	15.9207	15.9016	15.5282	12.9644
			Pair 8	10.9594	9.25718	9.61403	9.22809	9.33241
		Asymmetric pairs	Pair 1	6.8235	5.12687	4.5906	5.85179	7.03397	6.32152
			Pair 2	4.26507	5.01508	4.82593	5.43372	6.13157	5.98073
			Pair 3	3.02528	4.73077	4.21849	4.44651
			Pair 4	5.86379	5.5621	6.97749	8.93615	11.3962	13.5206
			Pair 5	6.52645	6.01747	8.63635	9.50672	8.1542
			Pair 6	3.35759	4.63499	5.80661	6.31053	6.93171	5.5354
			Pair 7	7.6962	6.75013	6.25245	5.36716	6.72665	5.22485
			Pair 8	8.17497	9.23594	11.0047	11.0713	12.9662
			Pair 9	6.14396	6.28979	8.45591	4.72751	5.80977	5.97695
			Pair 10	8.13593	9.06412	10.1876	10.9508	10.9198	13.7508
			Pair 11	7.53888	7.56993	6.88806	7.53969	6.79192	5.41141
			Pair 12	4.40008	3.82747	3.61785	5.83139	3.87049	4.61677
			Pair 13	9.68357	9.72551	9.111	10.2445	10.5254	5.14788
			Pair 14	5.26657	5.89061	5.20825	6.9463	6.32296	9.95404
			Pair 15	5.38165	6.58917	6.52172	6.11117	6.52962	6.46295
			Pair 16	4.39235	5.17745	5.28344	7.2285	7.69422	9.81707
			Pair 17	5.84606	6.01596	8.11349	6.83776	4.82679	6.01446

## Sheet: Fig. 7F
		Time (h)	0	1	2	3	4	5	6	7	8	9	10	11	12	13	14	15	16	17	18
	Sister cells distance (µm)	Symmetric pair	8.33191	12.2358	13.0187	21.4913	22.8635
		Asymmetric pair	4.40008	3.82747	3.61785	5.83139	3.87049	4.61677	4.51409	7.16816	8.49805	7.34249	14.3973	12.6935	16.5035	17.3651	22.0557	26.7161	26.137	27.9298	28.8861
