# Supplementary material for: An improved organ explant culture method reveals stem cell lineage dynamics in the adult Drosophila intestine
Source: eLife. 2022 Aug 25;11:e76010. doi: 10.7554/eLife.76010 (PMC9578704; doi:10.7554/eLife.76010)
Supplement: Figure 8—source data 1. [file elife-76010-fig8-data1.xlsx]

## Sheet: Fig. 8B
	GFP intensity
	0D	1D	2D
	1601.47	1648.64	2342.24
	1495.78	1303.7	1945.23
	1540.3	1304.27	1951.68
	1552.96	1396.94	2486.68
	1322.8	1246.44	1879.46
	1504.54	1305.66	1754.49
	1545.12	1417.58	1901.26
	1386.26	1283.69	1800.52
	1492.87	1259.46	2415.28
	1479.61	1285.43	2043.64
	1637.81	1310.7	2159.34
	1446.78	1257.18	2493.26
	1507.71	1314.65	2325.81
	1535.74	1304.48	2080.75
	1435.63	1288.67	1831.86
	1191.38	1292.99	1841.02
	1222.03	1280.38	2284.8
	1234.63	1233.08	2256.05
	1239.54	1253.7	2183.16
	1267.54	1219.03	2491.18
	1240.59	1326.95	1550.77
	1225.87	1308.89	2370.85
	1218.84	1233.43	1986.86
	1204.95	1312.45	1591.37
	1208.31	1344.69	1674.25
	1190.09	1455.7	3329.01
	1356	1405.79	2104.49
	1420.35	1409.48	2245.64
	1404.94	1436.32	2464.57
	1440.81	1595.08	2079.25
	1493.2	1589.95	2478.05
	1500.02	1577.02	2512.88
	1338.66	1614.76	1946.89
	1495.05	1437.76	1852.73
	1308.45	1449.45	1825.4
	1539.64	1562.08	1808.16
	1430.54	1304.17	2413.34
	1381.27	1350.6	2618.96
	1378.28	1391.47	2326.71
	1430	1478.67	2645.89
	1443.29	1506.44	2961.76
	1419.19	1561.77	2368.05
	1339.41	1451.15	2914.36
	1556.4	1349.61	2708.32
	1372.51	1360.88	2734.9
	1591.39	1381.44	1920.59
	1359.88	1393.03	2414.98
	1376.98	1510.01	2493.43
	1381.35	1491.79	2741.67
	1398.63	1384.32	3261.15
	1272.96	1291.78	2656.14
	1284.86	1335.23	2433.73
	1306	1318.55	2062.16
	1276.93	1323.93	2175.49
	1217.49	1311.3	2217.68
	1315.7	1329.76	1956.24
	1345.98	1269.33	2114.85
	1211.12	1282.02	1384.25
	1160.93	1430.49	1493.58
	1147.6	1220.8	1733.85
	1149.39	1275.85	1826.07
	1174.92	1227.15	1760.9
	1150.25	1379.06	1891.79
	1183.93	1346.08	1754.07
	1501.33	1373.93	1909.08
	1323.44	1353.89	1715.91
	1215.1	1308.92	1796.77
	1165.87	1345.12	1850.94
	1122.42	1462.72	2172.45
	1269.08	1473.02	1809.54
	1213.49	1475.55	2016.45
	1120.78	1594.85
	1151.76	1494.95
	1149.87	1515.82
	1064.76	1365.5
	1060.95	1418.63
	1465.35	1455.31
	1456.63	1502.94
	1539.53	1546.82
	1541.82	1494.36
	1640.82	1492.52
	1570.39	1560.45
	1579.82	1437.13
	1552.19	1389.22
	1498.16	1352.72
	1435.51	1408.33
	1387.12	1457.67
	1541.68	1396.01
	1367.52	1413.08
	1475.82	1363.9
	1544.42	1358.24
	1542.57	1297.26
	1649.37	1404.2
	1532.64
	1586.44
	1471.23
