# Supplementary material for: An improved organ explant culture method reveals stem cell lineage dynamics in the adult Drosophila intestine
Source: eLife. 2022 Aug 25;11:e76010. doi: 10.7554/eLife.76010 (PMC9578704; doi:10.7554/eLife.76010)
Supplement: Supplementary file 1. [file elife-76010-supp1.xlsx]

## Sheet: Culture Medium Recipe
	The concentrations for the additives were defined so as to run through the solutions fairly quickly, thus avoiding them getting old.
	N.B. Prepare each additive solution using Schneider's medium.
	N.B. Do not filter the individual additive solutions, filter the final modifed medium instead.
	N.B. Store each solution at 4°C for no more than 1 month.
	N.B. Add Glutamine only if using a batch of Schneider's medium without it.
	Modified Schneider's Medium
	Component	MW (g/mol)	Final Concentration (mM)	Final Concentration (g/L)	Volume Needed (ml)
	Trisodium Citrate Dihydrate	294.1	1	0.2941	2
	Sodium Chloride	58.44	55	3.2142	2
	D-(+)-Trehalose Anhydrous	342.3	50	17.115	4
	Glutamine (0.2M Stock)	146.14	10	1.4614	1
	N-Acetyl Cysteine	163.195	2	0.32639	2
	Solution Volume (mL)
	20
	Schneider's Medium Volume (mL)
	9
	Additive-1 (10X)
	Component	MW (g/mol)	Final Concentration (mM)	Final Concentration (g/L)	Mass Needed (g)
	Trisodium Citrate Dihydrate	294.1	10	2.941	0.017646
	Solution Volume (mL)
	6
	Additive-2 (10X)
	Component	MW (g/mol)	Final Concentration (mM)	Final Concentration (g/L)	Mass Needed (g)
	Sodium Chloride	58.44	550	32.142	0.192852
	Solution Volume (mL)
	6
	Additive-3 (5X)
	Component	MW (g/mol)	Final Concentration (mM)	Final Concentration (g/L)	Mass Needed (g)
	D-(+)-Trehalose Anhydrous	342.3	250	85.575	0.6846
	Solution Volume (mL)
	8
	Additive-4 (10X)
	Component	MW (g/mol)	Final Concentration (mM)	Final Concentration (g/L)	Mass Needed (g)
	N-Acetyl Cysteine	163.195	20	3.2639	0.0195834
	Solution Volume (mL)
	6

## Sheet: Catalog Numbers
	Reagent	Vendor	Catalog Number
	Schneider's medium	Genesee Scientific	25-515
	Trisodium Citrate Dihydrate	ThermoFisher Scientific	BP327
	Sodium Chloride	Sigma-Aldrich	S9888
	D-(+)-Trehalose Anhydrous	Sigma-Aldrich	T0167
	Glutamine (0.2M Stock)	Gibco	25030
	N-Acetyl Cysteine	Sigma-Aldrich	A7250
