# Supplementary material for: An improved organ explant culture method reveals stem cell lineage dynamics in the adult Drosophila intestine
Source: eLife. 2022 Aug 25;11:e76010. doi: 10.7554/eLife.76010 (PMC9578704; doi:10.7554/eLife.76010)
Supplement: Supplementary file 2. [file elife-76010-supp2.xlsx]

## Sheet: RasG12V
	Summary of esgTS > RasG12V
	Lineage #1	Time-point (h)	16	17	18	19	20	21	22	23	24	25	26	27	28	29	30	31	32	33	34	35	36	37	38	39	40	41	42	43	44	45	46	47
	Nuclear Area (μm2)	Cell-0	16.5536	14.6184	17.1896	17.7792	19.066	23.054	22.562	26.9444	28.0364	33.7576	33.574	128.022	Divided
		Cell-1												Daughter of #0	29.3692	26.0824	20.6004	24.3176	24.2452	17.7504	26.0448	28.776	Divided
		Cell-2												Daughter of #0	22.2852	26.4572	23.302	25.904	29.266	29.376	115.329	Divided
		Cell-3																			Daughter of #2	21.0388	19.8136	23.116	28.45	26.3932	27.3656	91.5624	Divided
		Cell-4																			Daughter of #2	17.6288	20.6016	25.2976	22.6968	23.958	24.1708	20.95	22.9352	Divided
		Cell-5																				Daughter of #1	12.798	20.636	19.4792	18.59	21.9764	28.1852	24.7784	21.7884	21.6264	20.8384	24.202	33.5188
		Cell-6																				Daughter of #1	13.266	17.4408	20.7772	23.0404	22.2024	20.0752	23.4228	23.8292	18.0172	22.1108	Divided
		Cell-7																										Daughter of #3	15.0492	18.8172	15.3396	20.4912	21.0964	22.4752
		Cell-8																										Daughter of #3	17.966	19.7884	17.7164	20.488	64.164	Divided
		Cell-9																											Daughter of #4	11.4476	13.178	18.6184	18.3516	21.476
		Cell-10																											Daughter of #4	10.42	10.7308	13.9504	13.8252	16.866
		Cell-11																														Daughter of #6	13.808	19.1776
		Cell-12																														Daughter of #6	13.7408	19.7436
		Cell-13																															Daughter of #8	16.998
		Cell-14																															Daughter of #8	15.4764
	Normalized nlsGFP intensity	Cell-0	1.1627	1.1623	1.1744	1.1434	1.1361	1.1254	1.1119	1.1163	1.1164	1.1193	1.1353	1.0876	Divided
		Cell-1												Daughter of #0	1.1714	1.1447	1.1692	1.1999	1.2043	1.2428	1.2423	1.2178	Divided
		Cell-2												Daughter of #0	1.1029	1.1004	1.1231	1.1157	1.1262	1.136	1.0656	Divided
		Cell-3																			Daughter of #2	1.1471	1.151	1.1446	1.1144	1.1524	1.1961	1.0944	Divided
		Cell-4																			Daughter of #2	1.1673	1.1671	1.1996	1.191	1.1811	1.2157	1.2599	1.2388	Divided
		Cell-5																				Daughter of #1	1.1725	1.1807	1.1596	1.118	1.0879	1.0915	1.0995	1.1	1.0946	1.1021	1.146	1.1507
		Cell-6																				Daughter of #1	1.1998	1.2628	1.2409	1.2138	1.2067	1.1988	1.2083	1.2291	1.3024	1.2452	Divided
		Cell-7																										Daughter of #3	1.1841	1.18	1.2192	1.2015	1.1766	1.1952
		Cell-8																										Daughter of #3	1.1692	1.1622	1.1895	1.1531	1.0635	Divided
		Cell-9																											Daughter of #4	1.1958	1.2014	1.1676	1.1615	1.1724
		Cell-10																											Daughter of #4	1.1871	1.2079	1.2014	1.1987	1.1644
		Cell-11																														Daughter of #6	1.2695	1.243
		Cell-12																														Daughter of #6	1.1749	1.1516
		Cell-13																															Daughter of #8	1.1181
		Cell-14																															Daughter of #8	1.1201
	Lineage #2	Time-point (h)	29	30	31	32	33	34	35	36	37	38	39	40	41	42	43	44	45	46	47
	Nuclear Area (μm2)	Cell-0	15.9916	17.992	15.0972	Divided
		Cell-1			Daughter of #0	9.5788	11.9672	13.4136	12.4832	14.8784	16.4256	16.8576	Divided
		Cell-2										Daughter of #1	9.222	9.3552	13.044	11.6796	13.1052	14.7988	17.564	18.1412	17.7668
		Cell-3			Daughter of #0	8.5784	13.8072	13.3396	18.2376	15.8148	17.4136	15.6376	21.4084	23.3436	21.5992	21.83	24.8612	25.5828	28.05	26.2812	30.4384
		Cell-4										Daughter of #1	10.168	9.51	13.6756	13.6536	11.0336	12.272	14.6036	20.6592	20.5152
	Normalized nlsGFP intensity	Cell-0	1.1574	1.1519	1.1599	Divided
		Cell-1			Daughter of #0	1.1217	1.1032	1.0941	1.0777	1.0759	1.073	1.0769	Divided
		Cell-2										Daughter of #1	1.0758	1.0693	1.0685	1.0643	1.0832	1.1029	1.1055	1.1157	1.1036
		Cell-3			Daughter of #0	1.1032	1.1115	1.0948	1.0672	1.0631	1.0659	1.0817	1.0753	1.0905	1.1324	1.1434	1.1739	1.1821	1.1842	1.1837	1.145
		Cell-4										Daughter of #1	1.0773	1.0837	1.073	1.0713	1.088	1.0656	1.0698	1.0509	1.0177
	Lineage #3	Time-point (h)	24	25	26	27	28	29	30	31	32	33	34	35	36	37	38	39	40	41	42	43	44	45
	Nuclear Area (μm2)	Cell-0	14.7556	15.498	16.4544	14.6596	15.9956	Divided
		Cell-1					Daughter of #0	9.8512	12.4892	11.6268	13.0236	14.4508	15.3832	15.3656	16.0344	16.074	15.1776	15.7924	16.03	Divided
		Cell-2																	Daughter of #1	10.5244	16.0492	15.8408	17.3104	19.2648
		Cell-3					Daughter of #0	10.1544	9.8104	10.5452	10.8148	14.4088	15.926	15.7928	17.4176	17.436	17.0492	16.5532	18.3824	13.7064	20.336	21.31	22.1036	24.3616
		Cell-4																	Daughter of #1	8.8476	15.7812	14.1872	16.912	18.9404
	Normalized nlsGFP intensity	Cell-0	1.2453	1.2457	1.2079	1.2143	1.2072	Divided
		Cell-1					Daughter of #0	1.1421	1.1415	1.132	1.1197	1.1271	1.1101	1.0957	1.0752	1.0887	1.0998	1.0907	1.0682	Divided
		Cell-2																	Daughter of #1	1.0649	1.0511	1.0629	1.044	1.0395
		Cell-3					Daughter of #0	1.1848	1.1774	1.1598	1.1453	1.1421	1.1433	1.136	1.1126	1.1116	1.1255	1.1271	1.1371	1.1796	1.1567	1.161	1.1603	1.172
		Cell-4																	Daughter of #1	1.0459	1.0176	1.0237	1.0009	1.0126
	Lineage #4	Time-point (h)	31	32	33	34	35	36	37	38	39	40	41	42	43	44	45	46	47
	Nuclear Area (μm2)	Cell-0	10.6392	11.4152	10.2764	11.3916	15.0244	15.036	15.5052	21.7608	74.3128	Divided
		Cell-1									Daughter of #0	14.4488	15.0552	15.1164	16.486	14.556	26.0992	20.1196	Divided
		Cell-2																Daughter of #1	13.6544
		Cell-3									Daughter of #0	14.6396	12.67	14.7276	17.1808	13.3968	18.396	16.6068	27.182
		Cell-4																Daughter of #1	18.5096
	Normalized nlsGFP intensity	Cell-0	1.0499	1.0515	1.0394	1.0208	1.0558	1.066	1.099	1.0834	1.017	Divided
		Cell-1									Daughter of #0	1.0241	1.043	1.0227	1.0056	0.9932	0.9911	1.0012	Divided
		Cell-2																Daughter of #1	0.9916
		Cell-3									Daughter of #0	1.0833	1.103	1.0926	1.0804	1.0724	1.012	1.0315	1.0795
		Cell-4																Daughter of #1	1.0138
	Lineage #5	Time-point (h)	25	26	27	28	29	30	31	32	33	34	35	36	37	38	39	40	41	42	43	44	45	46	47	48	49
	Nuclear Area (μm2)	Cell-0	8.618	8.864	8.3032	12.7424	14.4104	13.8936	14.7412	14.888	14.6692	15.9112	15.8516	16.8872	19.176	18.5404	20.9696	23.3136	Divided
		Cell-1																Daughter of #0	17.4352	16.7876	19.1096	19.4632	21.4736	20.844	25.1816	Divided
		Cell-2																Daughter of #0	11.3548	15.8272	15.0608	15.204	13.2952	17.5648	16.3944	18.9368	21.6472
		Cell-3																							Daughter of #1	11.9936	17.284
		Cell-4																							Daughter of #1	12.5664	19.4968
	Normalized nlsGFP intensity	Cell-0	1.1171	1.1402	1.0765	1.0428	1.0789	1.075	1.09	1.0543	1.0772	1.0939	1.0966	1.132	1.1498	1.1768	1.1605	1.1732	Divided
		Cell-1																Daughter of #0	1.1777	1.1911	1.2167	1.261	1.3167	1.2342	1.2221	Divided
		Cell-2																Daughter of #0	1.1686	1.1212	1.0912	1.1322	1.144	1.125	1.1765	1.1738	1.1684
		Cell-3																							Daughter of #1	1.1366	1.1358
		Cell-4																							Daughter of #1	1.1857	1.1977
	Lineage #6	Time-point (h)	23	24	25	26	27	28	29	30	31	32	33	34	35	36	37	38	39	40	41	42	43	44	45	46	47
	Nuclear Area (μm2)	Cell-0	16.0272	17.3508	19.5072	16.9308	22.1764	18.8256	20.9536	Divided
		Cell-1							Daughter of #0	12.4616	11.2456	11.1256	15.0884	19.0556	21.324	14.2156	28.614	Divided
		Cell-2							Daughter of #0	11.9416	9.6236	10.7056	13.72	14.3696	17.6272	14.3832	13.3568	15.44	12.3352	16.1736	13.1456	13.9132	14.3296	15.0252	16.904	13.8416	16.9688
		Cell-3															Daughter of #1	12.12	17.4628	15.1428	16.104	16.3912	16.4972	19.172	22.8732	19.4904	20.0524
		Cell-4															Daughter of #1	11.8152	12.9756	13.4988	11.534	12.2432	16.0452	20.436	Divided
		Cell-5																						Daughter of #4	17.7112	18.2852	15.4416
		Cell-6																						Daughter of #4	13.596	14.42	14.6872
	Normalized nlsGFP intensity	Cell-0	1.099	1.1135	1.1058	1.1022	1.0882	1.094	1.0512	Divided
		Cell-1							Daughter of #0	1.0367	1.082	1.0945	1.0447	1.0587	1.0456	1.0933	1.0752	Divided
		Cell-2							Daughter of #0	1.0382	1.0358	1.0292	1.0148	1.0268	1.0146	1.0693	1.1112	1.0793	1.115	1.115	1.1543	1.0986	1.1154	1.0887	1.092	1.0932	1.0889
		Cell-3															Daughter of #1	1.0575	1.0473	1.0342	1.0507	1.0316	1.0438	1.0428	1.0462	1.0438	1.0359
		Cell-4															Daughter of #1	1.0902	1.0738	1.0677	1.0939	1.0449	1.0714	1.025	Divided
		Cell-5																						Daughter of #4	1.0059	1.0172	1.061
		Cell-6																						Daughter of #4	1.0238	1.0384	1.0202
	Lineage #7	Time-point (h)	27	28	29	30	31	32	33	34	35	36	37	38	39	40	41	42	43	44	45	46	47	48	49
	Nuclear Area (μm2)	Cell-0	12.7004	13.3936	15.696	16.5744	20.9064	19.3164	21.5204	33.6992	Divided
		Cell-1								Daughter of #0	11.1744	12.4556	10.3476	11.942	Divided
		Cell-2								Daughter of #0	12.1224	14.4728	10.8832	11.8488	14.126	16.26	12.5528	16.1516	19.0552	21.6328	24.6344	19.9112	23.894	24.88	26.336
		Cell-3												Daughter of #1	9.1168	5.8328	8.6228	10.1304	9.8716	8.956	11.442	10.9056	9.656	9.7364	15.1772
		Cell-4												Daughter of #1	8.0976	12.1528	13.5216	10.8856	12.5556	11.4316	13.436	15.7684	15.558	13.9992	19.3576
	Normalized nlsGFP intensity	Cell-0	1.1069	1.1087	1.1093	1.0833	1.0794	1.0844	1.0673	1.0434	Divided
		Cell-1								Daughter of #0	1.079	1.041	1.0506	1.0637	Divided
		Cell-2								Daughter of #0	1.1063	1.0263	1.0454	1.0744	1.0911	1.0935	1.141	1.1456	1.1452	1.1795	1.2127	1.1671	1.1999	1.2139	1.2021
		Cell-3												Daughter of #1	1.044	1.0925	1.0755	1.0781	1.107	1.0963	1.1135	1.0944	1.1015	1.0984	1.1177
		Cell-4												Daughter of #1	1.0623	1.1093	1.1011	1.0925	1.1101	1.1241	1.1326	1.1452	1.1662	1.1633	1.1849
	Lineage #8	Time-point (h)	28	29	30	31	32	33	34	35	36	37	38	39	40	41	42	43	44	45
	Nuclear Area (μm2)	Cell-0	17.4684	19.688	19.0628	16.9076	17.656	16.8396	15.678	20.8356	Divided
		Cell-1								Daughter of #0	12.6328	14.5548	13.4912	19.5608	13.742	17.4524	17.3168	15.766	16.9472	17.7244
		Cell-2								Daughter of #0	13.2084	14.294	13.4424	13.5072	11.0968	11.408	Divided
		Cell-3														Daughter of #2	10.712	7.2324	16.4204	10.77
		Cell-4														Daughter of #2	11.3624	9.012	10.5748	12.3188
	Normalized nlsGFP intensity	Cell-0	1.1203	1.1212	1.0699	1.0914	1.0844	1.0648	1.0643	1.0393	Divided
		Cell-1								Daughter of #0	1.0437	1.0435	1.0374	1.0454	1.0492	1.0388	1.0378	1.0455	1.0516	1.0481
		Cell-2								Daughter of #0	1.0294	1.0314	1.05	1.0595	1.0669	1.0656	Divided
		Cell-3														Daughter of #2	1.0392	1.0487	1.0334	1.0416
		Cell-4														Daughter of #2	1.0473	1.0714	1.0719	1.0709
	Lineage #9	Time-point (h)	12	13	14	15	16	17	18	19	20	21	22	23	24	25	26	27	28	29	30	31	32	33
	Nuclear Area (μm2)	Cell-0	22.6476	21.9296	22.1588	30.2184	23.3328	20.0832	24.5832	22.5764	23.9796	Divided
		Cell-1									Daughter of #0	12.408	14.9268	13.7932	20.7044	18.4172	20.9964	22.1104	22.7856	24.1032	22.2608	27.6624	Divided
		Cell-2																				Daughter of #1	12.4992	14.0528
		Cell-3									Daughter of #0	17.716	15.9148	11.5936	21.1008	17.8984	28.4796	21.4592	13.9296	25.4048	17.7456	31.38	26.4328	23.0992
		Cell-4																				Daughter of #1	14.5328	15.3688
	Normalized nlsGFP intensity	Cell-0	1.1417	1.1103	1.1064	1.0755	1.0724	1.0648	1.0805	1.0652	1.0545	Divided
		Cell-1									Daughter of #0	1.0322	1.0518	1.0424	1.0583	1.0769	1.1227	1.1216	1.1188	1.0926	1.098	1.0916	Divided
		Cell-2																				Daughter of #1	1.0748	1.0625
		Cell-3									Daughter of #0	1.0587	1.0704	1.0639	1.0742	1.0888	1.0981	1.089	1.093	1.0774	1.079	1.0742	1.0832	1.082
		Cell-4																				Daughter of #1	1.0468	1.0472
	Lineage #10	Time-point (h)	1	2	3	4	5	6	7	8	9	10	11	12	13	14	15	16	17	18	19	20	21	22	23	24	25	26	27	28	29	30	31	32	33	34	35	36	37	38	39	40	41	42	43	44	45	46	47
	Nuclear Area (μm2)	Cell-0	11.97	14.2904	11.9124	10.5144	9.654	8.7092	9.3616	9.3016	12	10.0132	12.8312	15.254	15.8216	14.2532	14.3544	12.9672	16.0276	17.652	20.5532	22.8496	22.8216	26.678	25.0124	24.1012	25.86	27.714	27.8272	28.7288	30.3604	Divided
		Cell-1																													Daughter of #0	11.5516	14.9996	18.386	24.8588	28.33	27.3228	26.2652	29.7044	25.2848	23.2468	23.3408	27.3852	30.1256	Divided
		Cell-2																																										Daughter of #1	18.0276	16.206	15.2808	14.2892	17.974
		Cell-3																													Daughter of #0	15.8164	17.2044	19.88	23.322	21.528	24.5852	22.812	30.1592	26.0104	26.972	32.4012	30.652	31.5276	33.464	35.5056	39.4524	39.0952	39.2128
		Cell-4																																										Daughter of #1	25.2432	17.4228	21.6324	21.5576	21.8344
	Normalized nlsGFP intensity	Cell-0	1.2026	1.1388	1.1703	1.1941	1.2592	1.2587	1.2002	1.2169	1.2046	1.1925	1.2453	1.2232	1.2296	1.2845	1.2711	1.2857	1.2802	1.2748	1.2622	1.2663	1.2341	1.2659	1.2801	1.239	1.2857	1.2524	1.2522	1.3281	1.3342	Divided
		Cell-1																													Daughter of #0	1.3431	1.3255	1.3068	1.279	1.3246	1.4472	1.6219	1.6005	1.8542	1.713	1.7522	1.6701	1.6409	Divided
		Cell-2																																										Daughter of #1	1.4579	1.6938	1.5903	1.5331	1.5115
		Cell-3																													Daughter of #0	1.2924	1.2597	1.282	1.2409	1.2783	1.4386	1.3834	1.2664	1.4237	1.3565	1.253	1.2305	1.2421	1.1786	1.1966	1.1132	1.1082	1.1115
		Cell-4																																										Daughter of #1	1.4574	1.5781	1.4326	1.4294	1.4138
	Lineage #11	Time-point (h)	1	2	3	4	5	6	7	8	9	10	11	12	13	14	15	16	17	18	19	20	21	22	23	24	25	26	27	28	29	30	31	32	33	34	35	36	37	38	39	40	41	42	43	44	45	46	47
	Nuclear Area (μm2)	Cell-0	11.7144	17.0412	15.752	14.706	14.6512	16.354	14.4996	14.7488	12.9212	14.6008	15.3724	13.6084	16.1488	15.0024	17.328	15.3476	18.5708	21.6264	21.5164	19.6152	20.3204	24.652	21.722	23.7508	22.778	22.0572	23.8072	25.9484	25.944	25.2732	29.5176	29.5736	31.016	30.6624	34.486	31.9516	Divided
		Cell-1																																				Daughter of #0	25.226	22.7352	26.1112	31.6516	26.2088	Divided
		Cell-2																																									Daughter of #1	17.1944	16.9752	19.1596	22.1168	19.79	25.9856
		Cell-3
		Cell-4																																				Daughter of #0	19.838	23.7464	24.1452	25.718	24.878	26.702	29.9708	26.6708	30.2988	31.6664	33.1468
		Cell-5																																									Daughter of #1	11.6932	16.3384	18.6488	22.86	24.582	25.4872
		Cell-6
	Normalized nlsGFP intensity	Cell-0	1.3145	1.2894	1.2599	1.3359	1.2713	1.2053	1.2624	1.2528	1.2505	1.2622	1.2395	1.2921	1.2926	1.2592	1.3233	1.3306	1.3301	1.3505	1.3762	1.365	1.4192	1.4336	1.3514	1.3675	1.4715	1.4627	1.4927	1.6161	1.6582	1.7656	1.603	1.6089	1.6452	1.5655	1.5667	1.5777	Divided
		Cell-1																																				Daughter of #0	1.403	1.4229	1.3778	1.3361	1.4413	Divided
		Cell-2																																									Daughter of #1	1.351	1.3656	1.3151	1.3287	1.3127	1.1961
		Cell-3
		Cell-4																																				Daughter of #0	1.4454	1.403	1.3444	1.3755	1.3844	1.4078	1.4101	1.4076	1.4224	1.3789	1.3586
		Cell-5																																									Daughter of #1	1.4526	1.409	1.4397	1.5179	1.5054	1.4568
		Cell-6
	Lineage #12	Time-point (h)	33	34	35	36	37	38	39	40	41	42	43	44	45	46	47	48	49	50	51
	Nuclear Area (μm2)	Cell-0	12.3988	14.3868	14.4148	13.6452	14.1792	15.886	17.3372	18.3444	22.922	Divided
		Cell-1									Daughter of #0	10.3044	11.9492	12.7588	15.4548	13.5024	16.1144	18.6224	16.9148	14.692	19.0232
		Cell-2									Daughter of #0	9.8768	14.5784	13.0968	16.862	19.6468	21.0736	21.0508	23.4464	Divided
		Cell-3																	Daughter of #2	9.4768	9.7504
		Cell-4																	Daughter of #2	10.1816	13.2816
	Normalized nlsGFP intensity	Cell-0	1.31	1.337	1.305	1.3621	1.3948	1.4273	1.3803	1.4327	1.2964	Divided
		Cell-1									Daughter of #0	1.3912	1.2884	1.2876	1.2873	1.3461	1.277	1.3303	1.2747	1.3377	1.3338
		Cell-2									Daughter of #0	1.4283	1.2813	1.2731	1.2697	1.263	1.2468	1.2635	1.2675	Divided
		Cell-3																	Daughter of #2	1.1877	1.2387
		Cell-4																	Daughter of #2	1.2499	1.2717
	Lineage #13	Time-point (h)	11	12	13	14	15	16	17	18	19	20	21	22	23	24	25	26	27	28	29	30	31	32	33	34	35	36	37	38	39	40	41	42	43	44
	Nuclear Area (μm2)	Cell-0	12.3744	11.3344	13.322	16.9948	19.9792	16.606	Divided
		Cell-1						Daughter of #0	9.7796	15.0376	14.6908	18.7496	17.1092	19.6012	20.8252	21.6044	24.1208	24.3512	26.3432	28.9524	32.4504	31.6208	37.2392	Divided
		Cell-2																					Daughter of #1	45.9416	24.2748	30.8384	28.832	35.738	39.2504	37.1528	43.7556	Divided
		Cell-3																					Daughter of #1	31.392	21.9396	22.3592	24.1804	30.5688	29.542	30.6292	29.126	28.4272	28.7336	28.362	30.9464	26.6584
		Cell-4						Daughter of #0	12.6704	13.8456	12.7944	15.1876	11.6636	17.8724	15.6104	22.9336	20.4208	20.8588	20.4104	23.1652	26.0336	23.7476	25.2464	26.516	28.7956	25.914	25.1796	35.9884	27.3272	29.216	29.9596	31.0288	27.8676	30.1676	25.1588	29.9908
		Cell-5																													Daughter of #2	45.1396	18.3444	20.4524	18.736	17.9736
		Cell-6																													Daughter of #2	46.314	22.9256	18.6452	20.7476	25.748
	Normalized nlsGFP intensity	Cell-0	1.1547	1.2008	1.1909	1.1911	1.1709	1.1542	Divided
		Cell-1						Daughter of #0	1.143	1.1723	1.1638	1.261	1.346	1.2791	1.3973	1.3797	1.44	1.4286	1.447	1.4415	1.5104	1.4966	1.4586	Divided
		Cell-2																					Daughter of #1	1.2228	1.2813	1.2823	1.2942	1.251	1.2678	1.2658	1.2235	Divided
		Cell-3																					Daughter of #1	1.2866	1.3734	1.3397	1.3493	1.3356	1.329	1.375	1.3944	1.4202	1.4967	1.49	1.5062	1.3984
		Cell-4						Daughter of #0	1.159	1.1585	1.1375	1.1814	1.2066	1.2016	1.22	1.1807	1.1956	1.1674	1.1575	1.1826	1.158	1.173	1.1507	1.1401	1.1346	1.1537	1.1532	1.1393	1.1358	1.1248	1.1462	1.1132	1.0992	1.1004	1.0914	1.0778
		Cell-5																													Daughter of #2	1.1488	1.1882	1.1685	1.1629	1.2085
		Cell-6																													Daughter of #2	1.163	1.2162	1.3019	1.2208	1.1983
	Lineage #14	Time-point (h)	3	4	5	6	7	8	9	10	11	12	13	14	15	16	17	18	19	20	21	22	23	24	25	26	27	28	29	30	31	32	33	34	35	36	37	38	39	40	41	42	43	44	45	46	47	48	49
	Nuclear Area (μm2)	Cell-0	21.5028	26.3536	21.0908	23.2024	27.3964	26.4852	29.5488	33.1176	33.8548	24.1876	42.7772	36.028	22.7928	22.0088	29.0576	29.9248	33.2168	31.3192	28.3776	30.3584	34.988	32.0188	32.9888	45.0096	35.3928	Divided
		Cell-1																									Daughter of #0	22.6744	20.8208	23.3792	23.9488	23.14	24.8336	24.656	21.84	26.8336	25.372	28	23.4208	31.172	35.84	26.3736	27.9264	25.1704	26.2952	23.9536	24.0984	23.41	30.6652
		Cell-2																									Daughter of #0	22.8848	21.4656	22.1192	23.7424	23.0344	23.4864	26.5696	23.4136	22.952	23.2904	24.3736	Divided
		Cell-3																																				Daughter of #2	24.3104	22.7088	20.8552	22.832	27.5984	24.4872	29.8408	23.7744	22.2104	21.056	29.472
		Cell-4																																				Daughter of #2	19.688	17.1024	19.3184	21.2544	20.2112	20.5928	22.4344	21.6656	29.1404	19.7012	30.1396
	Normalized nlsGFP intensity	Cell-0	1.074	1.0716	1.0888	1.08	1.0734	1.0565	1.0626	1.0308	1.023	1.0376	1.0266	1.0717	1.1058	1.0892	1.0938	1.1244	1.1768	1.2184	1.2674	1.3006	1.3222	1.3762	1.3351	1.3655	1.3343	Divided
		Cell-1																									Daughter of #0	1.2431	1.3345	1.2757	1.3039	1.2914	1.2914	1.2552	1.256	1.2197	1.208	1.217	1.1974	1.18	1.1436	1.1554	1.1384	1.1316	1.13	1.1561	1.1332	1.1321	1.1277
		Cell-2																									Daughter of #0	1.2741	1.3467	1.2721	1.3251	1.3203	1.3665	1.3224	1.3295	1.2577	1.2569	1.2627	Divided
		Cell-3																																				Daughter of #2	1.1663	1.219	1.2216	1.2195	1.2082	1.1604	1.1664	1.1541	1.1735	1.1329	1.1132
		Cell-4																																				Daughter of #2	1.1669	1.1662	1.1559	1.139	1.1471	1.1289	1.1363	1.1222	1.1496	1.144	1.1202
	Lineage #15	Time-point (h)	7	8	9	10	11	12	13	14	15	16	17	18	19	20	21	22	23	24	25	26	27	28	29	30	31	32	33	34	35	36	37	38	39	40	41	42	43	44	45	46	47	48	49	50
	Nuclear Area (μm2)	Cell-0	25.9208	22.5328	23.3656	28.1552	30.0952	31.1032	26.192	27.8672	27.0672	31.5216	34.4792	35.6448	30.652	26.1816	30.212	35.54	32.2264	31.9496	29.0672	34.7976	36.8872	38.712	39.3208	38.7624	36.936	46.6592	44.2808	41.644	40.1976	45.2296	37.5144	41.99	45.0756	50.4844	56.2692	Divided
		Cell-1																																			Daughter of #0	49.0272	24.2432	24.42	31.9088	34.38	32.7936	Divided
		Cell-2																																			Daughter of #0	67.432	36.1808	30.9656	39.3088	52.8264	42.3768	50.8208	50.4328	50.1152
		Cell-3																																									Daughter of #1	20.8816	23.0472	20.4296
		Cell-4																																									Daughter of #1	19.9944	21.92	19.1952
	Normalized nlsGFP intensity	Cell-0	1.0658	1.056	1.0663	1.0866	1.0866	1.061	1.0669	1.0673	1.0617	1.075	1.103	1.1102	1.1743	1.1998	1.2166	1.2553	1.2677	1.3397	1.3418	1.3783	1.3699	1.429	1.3654	1.3366	1.3677	1.3234	1.3733	1.4169	1.4454	1.4266	1.419	1.3343	1.4366	1.4187	1.378	Divided
		Cell-1																																			Daughter of #0	1.139	1.304	1.2822	1.2212	1.2894	1.3066	Divided
		Cell-2																																			Daughter of #0	1.1309	1.2938	1.302	1.2362	1.2246	1.2361	1.257	1.248	1.2482
		Cell-3																																									Daughter of #1	1.1758	1.1899	1.2292
		Cell-4																																									Daughter of #1	1.1875	1.1851	1.2154
	Lineage #16	Time-point (h)	6	7	8	9	10	11	12	13	14	15	16	17	18	19	20	21	22	23	24	25	26	27	28
	Nuclear Area (μm2)	Cell-0	22.4004	21.6864	20.3728	21.0076	22.674	19.912	20.5976	24.5764	21.2428	24.7256	19.6632	Divided
		Cell-1											Daughter of #0	14.5344	15.4328	19.2272	19.28	21.5372	Divided
		Cell-2											Daughter of #0	17.51	16.63	15.03	20.16	19.0404	18.4464	17.2804	19.8028	17.4072	22.2892	21.376	21.018
		Cell-3																Daughter of #1	17.7704	17.0056	19.16	43.8528	Divided
		Cell-4																Daughter of #1	19.5688	15.312	17.2824	15.524	19.9576	18.6824	15.7096
		Cell-5																				Daughter of #3	13.7112	11.664	12.5936
		Cell-6																				Daughter of #3	12.9852	11.0288	12.3552
	Normalized nlsGFP intensity	Cell-0	1.0967	1.0999	1.0968	1.0759	1.0808	1.0742	1.1016	1.1102	1.1175	1.1054	1.1357	Divided
		Cell-1											Daughter of #0	1.0758	1.1114	1.1131	1.1113	1.0539	Divided
		Cell-2											Daughter of #0	1.1035	1.0924	1.0806	1.072	1.1013	1.0525	1.0673	1.0724	1.0504	1.034	1.0449	1.0253
		Cell-3																Daughter of #1	1.0604	1.0919	1.1219	1.0517	Divided
		Cell-4																Daughter of #1	1.0596	1.1012	1.1722	1.2227	1.171	1.1555	1.2508
		Cell-5																				Daughter of #3	1.0701	1.0685	1.0875
		Cell-6																				Daughter of #3	1.0959	1.1012	1.0773
	Lineage #17	Time-point (h)	23	24	25	26	27	28	29	30	31	32	33	34	35	36	37	38	39	40	41	42	43	44	45	46	47	48	49	50
	Nuclear Area (μm2)	Cell-0	20.8868	18.748	19.8008	21.1516	Divided
		Cell-1				Daughter of #0	12.2992	14.9032	15.28	14.248	23.1056	18.3912	20.6448	20.3728	21.7016	48.8936	Divided
		Cell-2				Daughter of #0	12.3392	15.3452	16.4648	12.6792	14.7856	16.6656	21.5264	21.324	17.5816	16.152	21.6328	20.9032	26.6872	18.1928	17.9552	17.8624	19.4896	16.4864	22.9824	23.7496	24.562	28.7736	26.1552	25.9152
		Cell-3														Daughter of #1	18.076	14.0392	15.5872	16.0576	16.096	17.4496	18.172	14.6648	27.6952	20.744	16.8856	20.9056	24.1976	21.012
		Cell-4														Daughter of #1	17.2264	14.6656	16.3992	16.2392	20.9088	16.66	19.7952	22.8144	23.9592	25.504	33.468	31.2448	31.0192	26.9336
	Normalized nlsGFP intensity	Cell-0	1.5656	1.6273	1.5661	1.4715	Divided
		Cell-1				Daughter of #0	1.3264	1.3215	1.3847	1.4419	1.3435	1.3808	1.39	1.4191	1.343	1.2283	Divided
		Cell-2				Daughter of #0	1.4753	1.465	1.391	1.3981	1.3746	1.3823	1.3596	1.3475	1.4268	1.4437	1.4164	1.3966	1.3116	1.3428	1.3519	1.3368	1.3174	1.3322	1.3052	1.2929	1.2964	1.3439	1.297	1.2862
		Cell-3														Daughter of #1	1.2771	1.3056	1.2553	1.2299	1.2116	1.2063	1.1629	1.1611	1.1227	1.1019	1.095	1.0976	1.084	1.1006
		Cell-4														Daughter of #1	1.2505	1.2586	1.1954	1.1718	1.1555	1.1637	1.1219	1.0675	1.0746	1.1497	1.1099	1.0711	1.0185	1.0288
[truncated: 4 more columns]

## Sheet: stg, CycE
	Summary of esgTS > Stg, CycE lineages
	Lineage #1	Time-point (h)	18	19	20	21	22	23	24	25	26	27	28	29	30	31	32	33	34	35	36	37	38	39	40
	Nuclear Area (μm2)	Cell-0	19.5388	20.4508	22.766	20.7448	24.6176	29.17	26.784	Divided
		Cell-1							Daughter of #0	17.168	18.9212	23.2384	32.3676	26.6624	29.8636	29.4856	57.1016	Divided
		Cell-2							Daughter of #0	13.946	18.8104	24.1356	27.1716	28.1708	29.9572	34.9776	Divided
		Cell-3														Daughter of #2	20.8784	14.9356	14.0656	12.0824	16.3428	25.1684	26.7212	25.142	24.9392
		Cell-4														Daughter of #2	22.0336	21.8456	19.6768	18.0072	17.9428	27.6048	22.17	25.212	24.0152
		Cell-5															Daughter of #1	14.4568	16.3448	19.3916	21.6796	19.2312	22.2648	24.1612	22.4556
		Cell-6															Daughter of #1	12.5608	16.0772	21.8056	19.4016	17.7564	17.6092	18.7328	18.772
	Normalized nlsGFP intensity	Cell-0	1.4909	1.4305	1.4543	1.2971	1.24	1.2248	1.2351	Divided
		Cell-1							Daughter of #0	1.2356	1.1903	1.14	1.1108	1.1216	1.1315	1.1856	1.1059	Divided
		Cell-2							Daughter of #0	1.274	1.2399	1.1799	1.1706	1.137	1.168	1.2117	Divided
		Cell-3														Daughter of #2	1.0937	1.093	1.116	1.1604	1.2023	1.1545	1.2936	1.334	1.4535
		Cell-4														Daughter of #2	1.1551	1.1557	1.2112	1.2122	1.2896	1.2726	1.2114	1.2469	1.3543
		Cell-5															Daughter of #1	1.1224	1.1737	1.1434	1.1442	1.1372	1.1111	1.0965	1.1144
		Cell-6															Daughter of #1	1.1491	1.1523	1.0777	1.117	1.104	1.0977	1.0938	1.1105
	Lineage #2	Time-point (h)	1	2	3	4	5	6	7	8	9	10	11	12	13	14	15	16	17	18	19	20	21	22	23	24	25	26	27	28	29	30	31	32	33	34	35	36	37	38	39
	Nuclear Area (μm2)	Cell-0	9.4184	10.2684	8.4576	7.2608	7.536	10.8784	10.5864	11.2652	13.4024	12.6284	13.7368	18.2184	17.4048	14.422	18.6876	16.9096	15.718	18.9988	23.1308	19.8292	20.8008	34.6904	Divided
		Cell-1																						Daughter of #0	19.3584	17.8312	15.7912	17.6256	18.222	18.8816	19.42	20.6056	21.5808	24.3944	56.232	Divided
		Cell-2																																	Daughter of #1	13.5792	13.3876	13.82	18.4492	13.78	20.6292
		Cell-3																						Daughter of #0	21.8912	18.858	15.9872	17.3244	17.7012	19.902	24.1584	21.5752	22.4008	30.1936	31.708	27.24	26.7552	27.8592	27.7868	35.9976	28.6656
		Cell-4																																	Daughter of #1	17.8336	19.3624	20.454	18.5248	18.35	15.3992
	Normalized nlsGFP intensity	Cell-0	1.006	1.0191	1.0106	1.0157	1.0161	1.0118	1.0166	1.0075	1.0249	1.0144	1.0257	1.0081	1.0234	1.0214	1.0198	1.0266	1.0199	1.0267	1.0306	1.0614	1.0621	1.0568	Divided
		Cell-1																						Daughter of #0	1.0624	1.097	1.113	1.0963	1.0951	1.0989	1.1379	1.113	1.1453	1.1304	1.0679	Divided
		Cell-2																																	Daughter of #1	1.1869	1.1368	1.1166	1.1184	1.2761	1.1257
		Cell-3																						Daughter of #0	1.1041	1.1196	1.1379	1.1226	1.1149	1.124	1.1145	1.1196	1.0925	1.0947	1.0901	1.1196	1.0958	1.1142	1.1135	1.0924	1.0793
		Cell-4																																	Daughter of #1	1.1105	1.1469	1.1412	1.1271	1.1624	1.1494
	Lineage #3	Time-point (h)	16	17	18	19	20	21	22	23	24	25	26	27	28	29	30	31	32	33	34	35	36	37	38	39	40	41	42	43	44	45	46	47
	Nuclear Area (μm2)	Cell-0	12.5072	14.1872	9.134	7.592	9.9656	15.8728	18.7192	25.012	24.8736	24.788	25.8672	23.54	27.3056	24.5176	28.9496	28.32	64.0488	Divided
		Cell-1																	Daughter of #0	14.74	14.512	18.5992	20.7	19.0792	30.2584	31.7184	36.4672	27.2408	Divided
		Cell-2																	Daughter of #0	16.7592	13.104	20.3448	22.3136	21.932	31.532	31.9136	33.948	32.8684	25.1704	Divided
		Cell-3																											Daughter of #2	14.2324	16.3204	17.7184	23.0468	19.212
		Cell-4																										Daughter of #1	12.708	16.0692	15.5236	19.2976	17.08	18.8416
		Cell-5																										Daughter of #1	11.7232	16.0124	18.4004	19.7168	18.7432	15.1448
		Cell-6																											Daughter of #2	15.2808	18.3272	15.6808	15.3808	21.9832
	Normalized nlsGFP intensity	Cell-0	0.9928	1.0214	1.0438	1.0796	1.0737	1.0629	1.0764	1.0773	1.0955	1.0894	1.0894	1.0947	1.1229	1.1875	1.1954	1.1917	1.1448	Divided
		Cell-1																	Daughter of #0	1.2021	1.2097	1.2213	1.146	1.1948	1.2202	1.2675	1.3057	1.3227	Divided
		Cell-2																	Daughter of #0	1.165	1.2442	1.2393	1.2733	1.333	1.2786	1.3198	1.3622	1.2635	1.3844	Divided
		Cell-3																											Daughter of #2	1.336	1.2719	1.277	1.2103	1.2227
		Cell-4																										Daughter of #1	1.3555	1.2645	1.3046	1.3629	1.3926	1.3924
		Cell-5																										Daughter of #1	1.2666	1.2207	1.2211	1.207	1.2082	1.2612
		Cell-6																											Daughter of #2	1.2928	1.2943	1.2924	1.2976	1.3557
	Lineage #4	Time-point (h)	2	3	4	5	6	7	8	9	10	11	12	13	14	15	16	17	18	19	20	21	22	23	24	25	26	27	28	29	30	31	32	33	34	35	36	37	38	39	40	41	42	43	44	45	46	47
	Nuclear Area (μm2)	Cell-0	20.436	25.928	31.0724	24.1084	28.9544	28.7104	26.6464	33.5008	27.0744	31.656	32.5328	36.2232	40.0664	42.9832	31.9348	Divided
		Cell-1															Daughter of #0	16.5936	15.9184	21.1624	25.8704	23.9552	25.8428	Divided
		Cell-2															Daughter of #0	15.0104	17.5912	21.496	23.076	26.5488	23.5536	22.8496	22.0384	19.722	23.8392	22.9384	22.1376	20.9584	21.064	28.1392	25.2344	29.344	25.96	28.62	24.9912	30.5816	31.6008	28.588	39.2852	38.348	37.586	36.6568	31.9772	29.922	25.0172	25.3436
		Cell-3																					Daughter of #1	19.444	13.5824	12.8616	13.6792	12.424	12.864	17.4704	17.4304	18.064	19.3424	16.3408	17.304	17.1016	18.3436	14.9376	18.6968	24.0272	17.6828	21.0068	27.0112	22.9104	26.8328	22.5388	22.6328	22.9648
		Cell-4																					Daughter of #1	20.8352	18.8432	18.4864	15.0856	15.7512	15.9288	19.8232	15.7968	17.1472	25.0016	19.8872	19.8592	17.7368	19.3088	24.3652	27.7048	27.3984	24.638	26.8768	29.6008	24.6616	30.8728	23.8748	22.5176	24.2296
	Normalized nlsGFP intensity	Cell-0	1.0823	1.0812	1.0664	1.0947	1.0975	1.0926	1.1074	1.1008	1.1321	1.1245	1.1265	1.1152	1.0938	1.101	1.1002	Divided
		Cell-1															Daughter of #0	1.0877	1.1013	1.0924	1.0871	1.1359	1.1966	Divided
		Cell-2															Daughter of #0	1.0689	1.0821	1.0838	1.0845	1.1441	1.2407	1.2965	1.2918	1.2972	1.2221	1.222	1.2449	1.2578	1.2518	1.2086	1.1577	1.1024	1.1396	1.1197	1.115	1.0864	1.0624	1.0575	1.0296	0.9965	1.0173	0.9653	0.951	0.9584	1.0103	1.038
		Cell-3																					Daughter of #1	1.1323	1.1505	1.1402	1.1146	1.1572	1.2081	1.2198	1.2389	1.2645	1.2656	1.3097	1.3043	1.298	1.3228	1.4254	1.3352	1.333	1.4306	1.3708	1.3127	1.2793	1.2497	1.2018	1.1973	1.2123
		Cell-4																					Daughter of #1	1.161	1.205	1.2326	1.2283	1.239	1.2678	1.2539	1.2938	1.3596	1.3192	1.4018	1.4289	1.5287	1.5622	1.4921	1.4479	1.4887	1.4736	1.4007	1.3735	1.3594	1.3487	1.3492	1.3277	1.3335
	Lineage #5	Time-point (h)	18	19	20	21	22	23	24	25	26	27	28	29	30	31	32	33	34	35	36	37	38	39	40	41	42	43	44	45	46	47
	Nuclear Area (μm2)	Cell-0	23.4192	17.4256	22.3576	21.6352	24.4528	26.292	Divided
		Cell-1						Daughter of #0	13.18	18.1272	14.3576	15.9496	18.1584	21.8184	22.1192	31.5904	28.576	23.604	24.4024	27.884	24.716	22.8248	25.4104	27.5648	29.8856	32.6872	32.8412	28.9188	27.632	50.5372	Divided
		Cell-2																												Daughter of #1	14.5692	24.3724
		Cell-3						Daughter of #0	14.1544	15.2368	15.3208	15.1248	14.1656	21.352	19.5176	16.752	22.4248	20.3936	17.228	21.3248	23.2152	21.8184	22.8512	21.104	27.2324	23.5144	21.0124	22.8628	26.4824	22.3396	21.4352	21.756
		Cell-4																												Daughter of #1	17.9248	21.264
	Normalized nlsGFP intensity	Cell-0	1.0978	1.1749	1.2532	1.268	1.2487	1.2318	Divided
		Cell-1						Daughter of #0	1.2083	1.1951	1.1874	1.1715	1.1602	1.2385	1.2739	1.3085	1.2925	1.2884	1.2185	1.2195	1.2297	1.2587	1.2066	1.215	1.2002	1.162	1.1379	1.1553	1.1586	1.0886	Divided
		Cell-2																												Daughter of #1	1.0698	1.0583
		Cell-3						Daughter of #0	1.2496	1.2219	1.2309	1.2071	1.2298	1.1576	1.1702	1.1746	1.1469	1.1606	1.1252	1.1064	1.0987	1.1273	1.1182	1.1158	1.0879	1.0905	1.118	1.051	1.0311	1.0247	1.0629	1.0593
		Cell-4																												Daughter of #1	1.0661	1.0392
	Lineage #6	Time-point (h)	10	11	12	13	14	15	16	17	18	19	20	21	22	23	24	25	26	27	28	29	30	31	32	33	34	35	36	37	38	39	40	41	42	43	44	45	46	47	48	49	50
	Nuclear Area (μm2)	Cell-0	22.484	24.1688	26.948	27.4804	27.3664	26.4748	24.0964	26.8044	Divided
		Cell-1								Daughter of #0	15.4632	14.7912	10.4576	12.9432	13.4344	12.2952	13.256	17.4304	17.0928	14.0376	15.0376	22.4784	21.2016	26.2084	27.4072	25.3888	28.464	28.6972	32.4032	24.6008	24.854	32.5476	23.3912	24.5844	29.9392	32.038	33.2592	32.3376	30.9064	40.3936	40.778	45.2076	45.364
		Cell-2								Daughter of #0	11.268	10.3968	10.5584	16.4952	17.06	17.7704	21.2632	18.2208	22.1368	21.06	25.2192	20.5024	24.772	28.7948	32.0016	30.62	34.6516	45.3752	42.2772	Divided
		Cell-3																											Daughter of #2	27.9636	22.9744	22.9476	23.2708	28.0156	Divided
		Cell-4																											Daughter of #2	22.35	26.4388	24.4896	30.774	38.9244	42.5552	Divided
		Cell-5																																Daughter of #3	17.4632	11.8712	19.2512	25.7648	39.4252	25.8584	23.644	25.3008	25.7416
		Cell-6																																Daughter of #3	15.7832	12.5	16.8224	22.3552	31.056	32.0648	31.8208	28.1312	28.808
		Cell-7																																	Daughter of #4	18.4816	13.216	28.1064	27.4952	22.3092	31.5364	34.2564	31.9424
		Cell-8																																	Daughter of #4	20.3296	23.7808	31.0552	45.4972	36.2912	34.2184	36.4904	38.1864
	Normalized nlsGFP intensity	Cell-0	1.0373	1.0533	1.0539	1.0563	1.0702	1.0708	1.1106	1.1219	Divided
		Cell-1								Daughter of #0	1.1035	1.1053	1.1165	1.0698	1.0786	1.1064	1.0931	1.0902	1.0845	1.0836	1.0919	1.0668	1.0451	1.0653	1.0758	1.1032	1.1198	1.1567	1.1564	1.2126	1.1969	1.1544	1.1942	1.1774	1.1745	1.1578	1.1442	1.1333	1.1564	1.1339	1.122	1.1174	1.1157
		Cell-2								Daughter of #0	1.123	1.1361	1.1009	1.0951	1.0986	1.0821	1.0839	1.1045	1.0984	1.1058	1.1206	1.1199	1.1298	1.1511	1.177	1.1973	1.186	1.1546	1.1331	Divided
		Cell-3																											Daughter of #2	1.1015	1.1471	1.1399	1.1597	1.151	Divided
		Cell-4																											Daughter of #2	1.0902	1.1055	1.1016	1.1341	1.1118	1.0723	Divided
		Cell-5																																Daughter of #3	1.1283	1.1466	1.1258	1.1	1.0382	1.0822	1.0857	1.0725	1.0541
		Cell-6																																Daughter of #3	1.1029	1.1224	1.1183	1.0088	1.0729	1.0526	1.0611	1.0808	1.0679
		Cell-7																																	Daughter of #4	1.0812	1.1044	1.0573	1.0777	1.0841	1.0608	1.0553	1.0542
		Cell-8																																	Daughter of #4	1.1016	1.1113	1.0976	1.0842	1.079	1.0628	1.0721	1.0541
	Lineage #7	Time-point (h)	11	12	13	14	15	16	17	18	19	20	21	22	23	24	25	26	27	28	29	30	31	32	33	34	35	36	37	38	39	40	41	42	43	44	45	46	47	48	49	50
	Nuclear Area (μm2)	Cell-0	5.488	6.0512	7.844	7.392	8.6736	10.508	9.2824	9.7368	11.8408	11.4904	9.3968	13.9248	14.4552	17.0096	18.132	22.6104	24.2864	58.92	Divided
		Cell-1																		Daughter of #0	15.2856	14.6688	14.3184	20.4368	24.5896	21.4856	26.864	27.0856	19.1008	17.536	23.6632	22.9496	21.5776	21.156	Divided
		Cell-2																		Daughter of #0	12.9408	14.8896	14.3504	19.2424	22.328	15.0136	27.7272	25.98	17.7584	12.7128	14.2432	21.1712	23.4304	16.9752	19.8992	21.5672	16.7192	20.0288	17.6712	22.1328	20.6168	18.9896
		Cell-3																																Daughter of #1	13.0664	13.132	12.0872	14.3856	12.8144	11.5368	16.628	9.3464
		Cell-4																																Daughter of #1	15.2424	15.6088	15.868	19.8256	18.5056	19.7056	20.9608	19.0272
	Normalized nlsGFP intensity	Cell-0	0.9935	1.0034	0.9927	0.9768	0.9833	0.9831	0.9927	0.9835	0.9774	0.9767	1.0137	1.0078	1.0241	1.0377	1.0345	1.0512	1.0328	1.0025	Divided
		Cell-1																		Daughter of #0	0.9972	0.9976	1.014	0.9813	1.0212	1.0531	1.0429	1.0579	1.0858	1.0708	1.0848	1.0772	1.0798	1.0995	Divided
		Cell-2																		Daughter of #0	1.048	1.037	1.0283	1.0005	0.993	1.0374	1.0028	1.0276	1.0358	1.0364	1.0411	1.0412	1.0437	1.0601	1.056	1.0412	1.0607	1.047	1.0631	1.0132	1.0429	1.0239
		Cell-3																																Daughter of #1	1.0655	1.0584	1.0733	1.0466	1.0505	1.0304	1.0137	1.002
		Cell-4																																Daughter of #1	1.0449	1.0535	1.1012	1.0802	1.075	1.0521	1.0587	1.0402
	Lineage #8	Time-point (h)	20	21	22	23	24	25	26	27	28	29	30	31	32	33	34	35	36	37	38	39	40	41	42	43	44	45	46	47	48
	Nuclear Area (μm2)	Cell-0	20.7844	18.1872	15.6008	13.822	13.646	16.6328	15.502	12.8384	18.9896	24.9208	18.8224	21.2456	27.5936	26.348	Divided
		Cell-1														Daughter of #0	10.2352	15.0428	18.7224	18.7696	23.8408	29.8676	36.5408	54.57	Divided
		Cell-2														Daughter of #0	9.4872	11.6232	20.4624	19.7656	28.1752	31.8008	29.0672	51.0808	Divided
		Cell-3																						Daughter of #1	18.0924	21.4508	16.9568	18.4716	20.46	20.504	17.06
		Cell-4																						Daughter of #1	14.83	20.5096	16.588	20.512	23.092	19.82	18.4632
		Cell-5																						Daughter of #2	15.21	20.4	18.7128	19.8216	21.3568	22.7528	20.294
		Cell-6																						Daughter of #2	14.3096	15.4308	14.1392	21.12	19.692	20.328	20.386
	Normalized nlsGFP intensity	Cell-0	1.0057	1.0149	1.0183	1.0412	1.0651	1.0534	1.0438	1.0467	1.0451	1.0391	1.0229	1.0197	1.0077	0.9972	Divided
		Cell-1														Daughter of #0	0.9802	0.9946	0.9894	1.0014	1.0416	1.0781	1.0995	1.0458	Divided
		Cell-2														Daughter of #0	0.9647	0.9801	0.9806	0.9829	0.9906	1.0218	1.0302	1.0303	Divided
		Cell-3																						Daughter of #1	1.0824	1.0458	1.0694	1.0824	1.1045	1.0936	1.0705
		Cell-4																						Daughter of #1	1.1009	1.0771	1.0804	1.0554	1.0703	1.0821	1.0929
		Cell-5																						Daughter of #2	1.0665	1.0838	1.0679	1.0757	1.0749	1.0311	1.0358
		Cell-6																						Daughter of #2	1.0758	1.0512	1.0505	1.0309	1.0391	1.0691	1.0961
	Lineage #9	Time-point (h)	32	33	34	35	36	37	38	39	40	41	42	43	44	45	46	47	48
	Nuclear Area (μm2)	Cell-0	17.0512	17.5252	13.3116	Divided
		Cell-1			Daughter of #0	10.51	11.612	14.8672	15.428	17.0208	19.3748	13.564	17.6652	14.404	20.408	13.8768	22.3108	22.1784	28.3908
		Cell-2			Daughter of #0	13.7416	11.268	15.04	19.4888	19.6776	49.9804	Divided
		Cell-3									Daughter of #2	15.4144	13.4476	16.3176	16.5008	17.7896	26.892	25.9048	19.2584
		Cell-4									Daughter of #2	14.016	14.4472	16.2208	21.804	15.8608	20.2684	21.6896	20.868
	Normalized nlsGFP intensity	Cell-0	1.1456	1.1109	1.0246	Divided
		Cell-1			Daughter of #0	1.0364	1.0508	1.0296	1.0176	1.0119	1.0026	1.0412	1.0251	1.0285	1.0137	1.0224	1.0531	1.0474	1.0413
		Cell-2			Daughter of #0	1.0677	1.0486	1.0729	1.1365	1.1858	1.2103	Divided
		Cell-3									Daughter of #2	1.2285	1.2825	1.3165	1.3596	1.3252	1.4075	1.3354	1.3988
		Cell-4									Daughter of #2	1.2695	1.2108	1.2507	1.2244	1.2912	1.3083	1.3091	1.3276
	Lineage #10	Time-point (h)	10	11	12	13	14	15	16	17	18	19	20	21	22	23	24	25	26	27	28	29	30	31	32	33	34	35	36	37	38	39	40	41	42	43	44	45	46	47	48	49	50
	Nuclear Area (μm2)	Cell-0	12.1072	12.1388	10.1628	12.7652	14.1248	13.4164	10.5448	11.3004	13.8556	Divided
		Cell-1									Daughter of #0	6.5032	8.4856	10.6904	14.152	13.3156	17.348	17.1784	16.3408	14.634	13.738	17.8128	16.6868	20.3592	15.4772	18.4592	19.7504	22.276	16.676	24.416	28.5696	26.3872	22.9648	23.1168	23.2784	21.3256	22.8968	25.3952	26.572	25.0288	25.6152	26.36	30.7104
		Cell-2									Daughter of #0	7.3776	7.9452	8.9852	11.196	9.4656	12.3584	15.2928	15.6448	15.4044	14.1768	23.5552	21.46	26.0756	25.6104	24.6176	24.8	Divided
		Cell-3																									Daughter of #2	7.9096	13.0184	16.4064	18.948	15.9488	18.2368	24.0552	20.5696	23.6568	25.428	21.428	26.0176	28.2544	24.3392	35.4968	21.14
		Cell-4																									Daughter of #2	9.248	14.348	15.1704	13.872	18.0456	19.3896	17.608	21.1336	19.9928	22.2392	19.68	20.4048	17.96	22.0576	20.2104	20.284
	Normalized nlsGFP intensity	Cell-0	0.9771	0.9667	0.9741	0.9789	1.0042	1.0152	1.0317	1.0068	0.9958	Divided
		Cell-1									Daughter of #0	1.0172	1.0155	1.0313	1.034	1.0625	1.0735	1.0624	1.0551	1.0548	1.047	1.0538	1.046	1.0399	1.0318	1.0435	1.0502	1.0645	1.0666	1.0583	1.0545	1.0401	1.0471	1.0604	1.0537	1.0552	1.0349	1.0366	1.0376	1.0299	1.0118	1.0193	1.0059
		Cell-2									Daughter of #0	1.0346	1.034	1.03	1.0304	1.0368	1.0151	1.0445	1.0424	1.0424	1.0672	1.0766	1.0956	1.0959	1.1074	1.1214	1.1418	Divided
		Cell-3																									Daughter of #2	1.1278	1.1307	1.1447	1.1502	1.1502	1.1473	1.1391	1.1154	1.1102	1.1236	1.0776	1.09	1.0912	1.095	1.0721	1.1113
		Cell-4																									Daughter of #2	1.1069	1.0917	1.1127	1.1176	1.1083	1.1103	1.0869	1.0947	1.1041	1.0704	1.0537	1.0558	1.0271	1.0301	1.0552	1.0446
	Lineage #11	Time-point (h)	3	4	5	6	7	8	9	10	11	12	13	14	15	16	17	18	19	20	21	22	23	24	25	26	27	28	29	30	31	32	33	34	35	36	37	38	39	40	41	42	43	44	45	46	47	48	49
	Nuclear Area (μm2)	Cell-0	5.8451	6.8385	5.0264	6.7497	7.3829	9.1101	7.3942	7.9835	8.9331	9.2197	8.9089	9.6675	8.1999	9.2927	10.5457	11.8835	11.6138	11.4694	9.8287	12.6678	16.0885	18.455	16.1699	19.0236	17.4588	18.1943	19.9305	22.2583	24.1945	23.7225	24.3119	26.4661	33.0225	Divided
		Cell-1																																	Daughter of #0	12.6925	14.4321	14.8524	17.1082	20.1912	25.8003	24.9508	Divided
		Cell-2																																	Daughter of #0	13.9702	14.5445	16.4773	18.4303	21.5773	25.2733	27.832	24.7142	24.9333	27.0297	25.8132	31.3201	Divided
		Cell-3																																								Daughter of #1	9.4118	13.7904	14.876	15.8862	19.0124	19.9636	12.9195
		Cell-4																																								Daughter of #1	7.5914	12.3341	13.691	12.9499	16.6076	16.0227	17.0273
		Cell-5																																													Daughter of #2	19.7872	13.9652
		Cell-6																																													Daughter of #2	13.9185	16.134
	Normalized nlsGFP intensity	Cell-0	1.0771	1.0725	1.0585	1.0635	1.0584	1.0577	1.0418	1.0172	1.0321	1.0152	1.0123	1.0088	1.0005	0.9664	0.9786	0.9849	0.9955	0.9696	1.0079	0.9708	1.112	1.2022	1.3184	1.4098	1.4576	1.4305	1.4238	1.3397	1.3421	1.3203	1.3889	1.3925	1.2446	Divided
		Cell-1																																	Daughter of #0	1.2814	1.2263	1.241	1.263	1.2436	1.1978	1.2055	Divided
		Cell-2																																	Daughter of #0	1.3086	1.2751	1.239	1.2407	1.258	1.2293	1.2158	1.2235	1.234	1.2103	1.1796	1.1353	Divided
		Cell-3																																								Daughter of #1	1.1983	1.1546	1.1419	1.1404	1.1278	1.1138	1.0997
		Cell-4																																								Daughter of #1	1.2247	1.2027	1.1865	1.1938	1.1721	1.1851	1.1693
		Cell-5																																													Daughter of #2	1.0681	1.1097
		Cell-6																																													Daughter of #2	1.061	1.1158
	Lineage #12	Time-point (h)	26	27	28	29	30	31	32	33	34	35	36	37	38	39	40	41	42	43	44	45	46	47	48	49	50
	Nuclear Area (μm2)	Cell-0	24.6408	27.4404	Divided
		Cell-1		Daughter of #0	12.872	18.6172	16.648	22.2028	28.4284	Divided
		Cell-2		Daughter of #0	15.916	22.0628	16.4	16.4508	21.418	22.4884	18.9264	Divided
		Cell-3							Daughter of #1	9.3164	11.8976	14.2028	13.0428	17.1624	21.192	18.7328	Divided
		Cell-4							Daughter of #1	10.3248	11.2172	15.9772	16.3656	19.476	19.0384	16.8536	12.4328	25.2032	17.7632	27.4136	26.944	30.04	23.5796	22.3256	20.5692	24.8072	22.9576
		Cell-5									Daughter of #2	11.378	8.5948	13.7624	15.7576	15.596	19.0808	26.7672	16.164	23.2248	24.756	25.0872	24.8488	20.2812	25.4512	24.5184	23.0936
		Cell-6									Daughter of #2	11.9352	13.4276	17.5752	19.1976	19.16	56.024	Divided
		Cell-7														Daughter of #3	13.432	9.1864	10.5904	19.8224	11.3304	11.3072	9.968	14.5608	7.9004	10.1168	12.2688
		Cell-8														Daughter of #3	13.4544	10.496	11.3496	18.5136	12.404	13.2084	13.9156	14.288	10.1812	12.1992	12.764
		Cell-9															Daughter of #6	13.9368	16.5184	18.8768	21.8712	18.9464	24.0352	23.626	22.38	Divided
		Cell-10															Daughter of #6	11.248	14.3512	13.884	16.6648	16.148	19.6232	18.5888	20.8328	23.236	13.6356
		Cell-11																							Daughter of #9	14.9248	13.2584
		Cell-12																							Daughter of #9	10.04	13.2148
	Normalized nlsGFP intensity	Cell-0	1.0638	1.0364	Divided
		Cell-1		Daughter of #0	1.076	1.0813	1.1006	1.1421	1.0839	Divided
		Cell-2		Daughter of #0	1.076	1.0779	1.1228	1.1288	1.0991	1.1026	1.0651	Divided
		Cell-3							Daughter of #1	1.1347	1.128	1.0822	1.0668	1.0771	1.0528	1.0605	Divided
		Cell-4							Daughter of #1	1.2034	1.1332	1.1371	1.1419	1.1104	1.1149	1.1031	1.1016	1.0104	1.0107	1.0244	1.0207	1.0289	1.0478	1.0963	1.0726	1.0571	1.0711
		Cell-5									Daughter of #2	1.0574	1.1006	1.0576	1.0693	1.1498	1.1141	1.0527	1.1163	1.0778	1.073	1.03	1.0599	1.0927	1.061	1.0672	1.0611
		Cell-6									Daughter of #2	1.0821	1.1708	1.2069	1.2694	1.4445	1.2163	Divided
		Cell-7														Daughter of #3	1.0311	1.026	1.0199	1.0325	1.0296	1.0091	1.0518	1.0567	1.0635	1.0853	1.0656
		Cell-8														Daughter of #3	1.0627	1.0529	1.0323	0.98	1.0453	1.0241	1.0484	1.0576	1.0925	1.0353	1.06
		Cell-9															Daughter of #6	1.293	1.2847	1.2499	1.2296	1.2291	1.2543	1.256	1.2293	Divided
		Cell-10															Daughter of #6	1.3444	1.2897	1.3003	1.2651	1.2303	1.2248	1.218	1.1694	1.1528	1.2363
		Cell-11																							Daughter of #9	1.0791	1.1873
		Cell-12																							Daughter of #9	1.1383	1.22
[truncated: 1 more columns]
